# Supplementary material for: Controllable Synthesis of Trifluoromethyl- or gem-Difluorovinyl-containing Analogues of Neonicotinoids by the Reaction of α-(Trifluoromethyl)styrenes with 2-Nitroimino-imidazolidine
Source: MDPI journal article supplement (doi:10.3390/molecules28083530), 2023-04-17

# Supporting Information

## **Controllable Synthesis of Trifluoromethyl- or *gem*-Difluorovinyl-containing Analogues of Neonicotinoids by the Reaction of $\alpha$ -(Trifluoromethyl)styrenes with 2-Nitroimino-imidazolidine**

Jingjing He <sup>1</sup>, Zhudi Sun <sup>1</sup>, Yupian Deng <sup>1</sup>, Ying Liu <sup>1</sup>, Pai Zheng <sup>1</sup> and Song Cao <sup>1,2,\*</sup>

<sup>1</sup>*Shanghai Key Laboratory of Chemical Biology, School of Pharmacy, East China University of Science and Technology (ECUST), Shanghai 200237, China*

<sup>2</sup>*Key Laboratory of Organofluorine Chemistry, Shanghai Institute of Organic Chemistry, Chinese Academy of Sciences, Shanghai 200032, China*

**<sup>1</sup>H, <sup>13</sup>C, <sup>19</sup>F NMR and HRMS (EI/ESI) spectra of the target compounds**

**<sup>1</sup>H NMR spectrum of 3aa (400 MHz, CDCl<sub>3</sub>)**

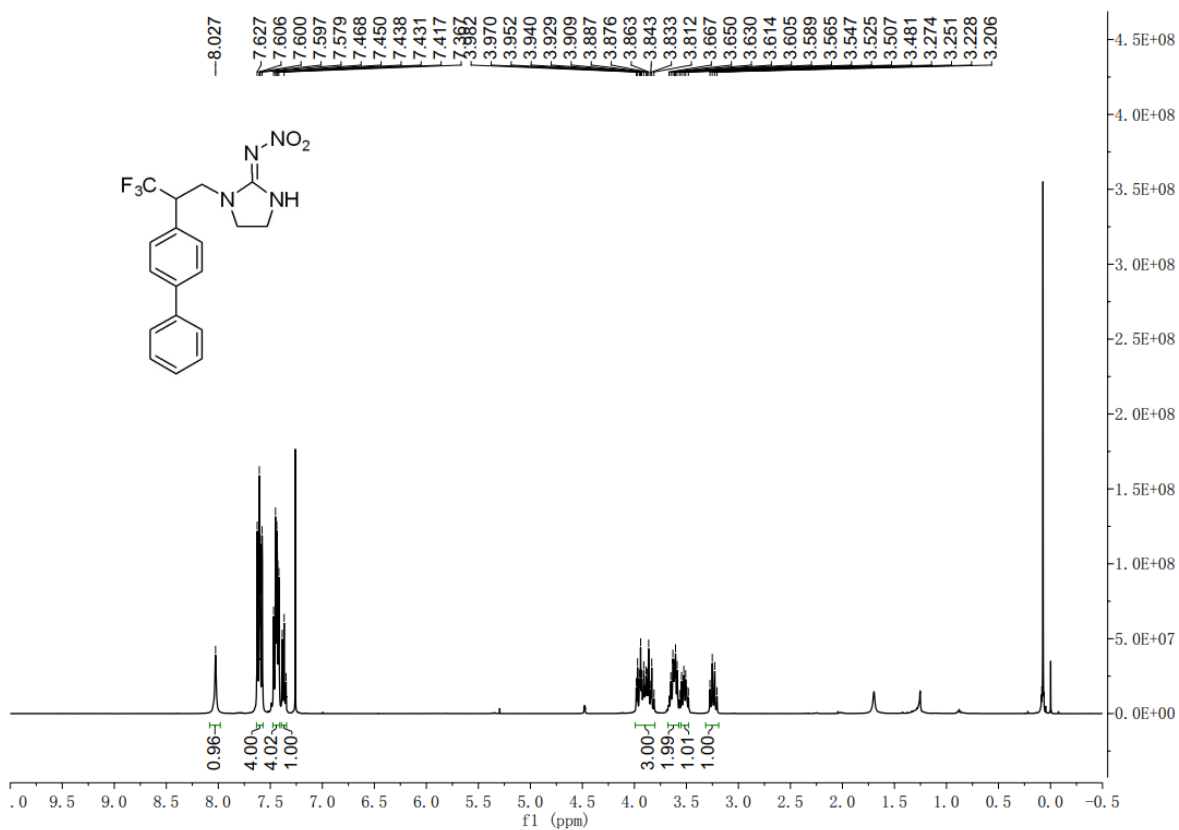

**<sup>13</sup>C NMR spectrum of 3aa (100 MHz, CDCl<sub>3</sub>)**

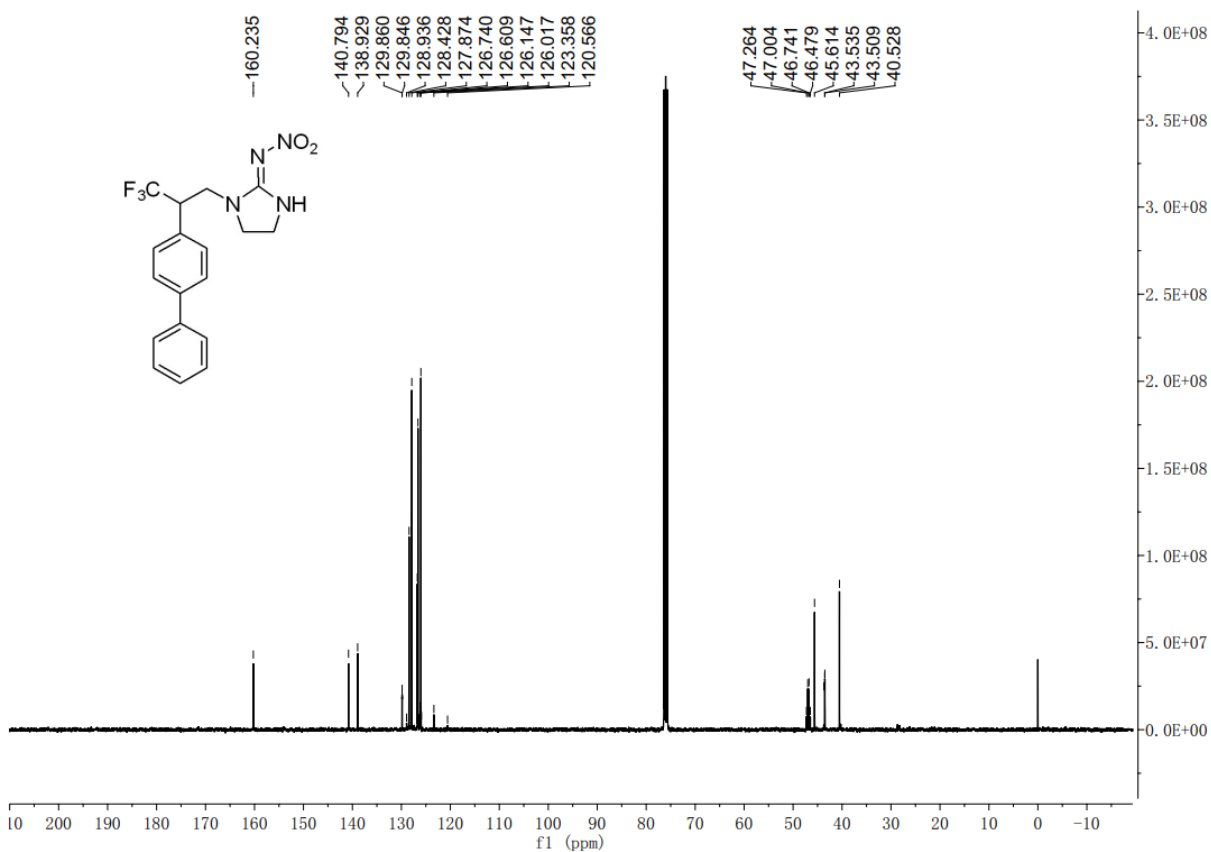

**$^{19}\text{F}$  NMR spectrum of 3aa (564 MHz,  $\text{CDCl}_3$ )**

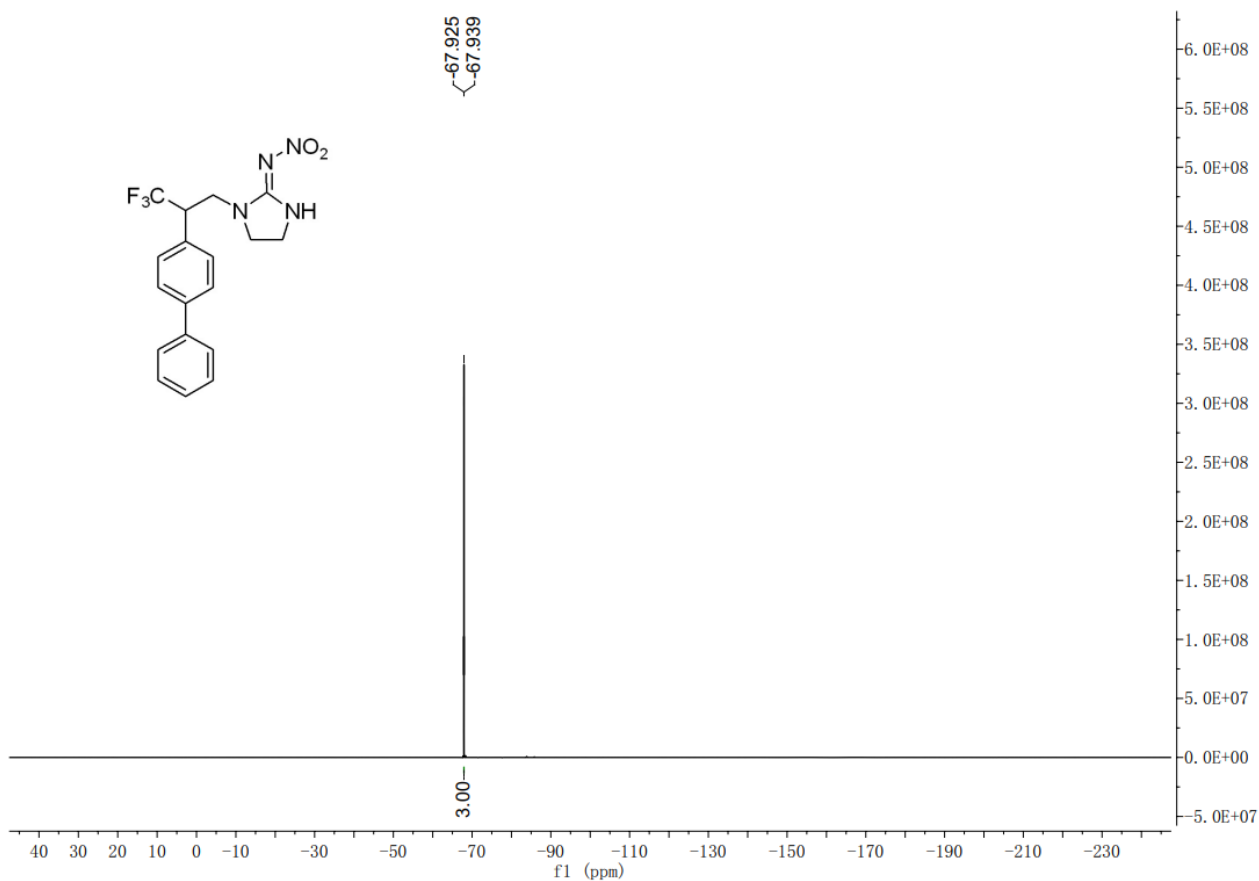

**HRMS (EI) spectrum of 3aa**

20221594 533 (8.884) Cm (533-(26+93))

TOF MS EI+  
1.87e4

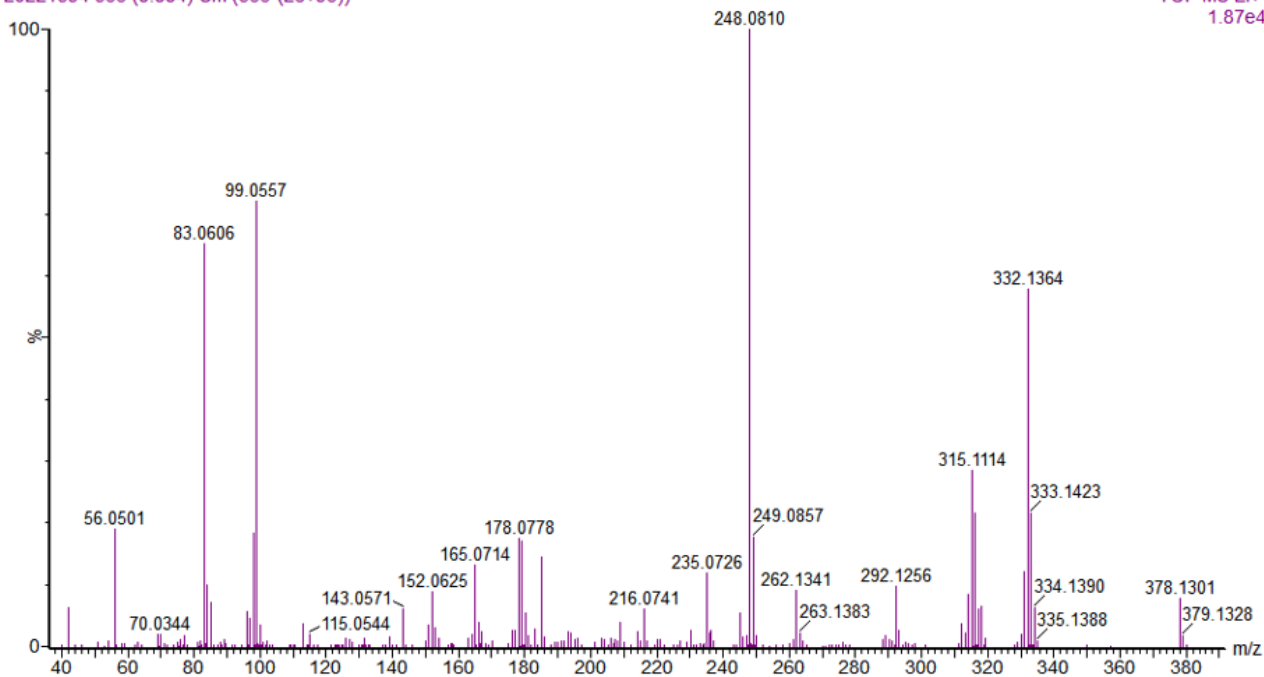

**<sup>1</sup>H NMR spectrum of 3ba (400 MHz, CDCl<sub>3</sub>)**

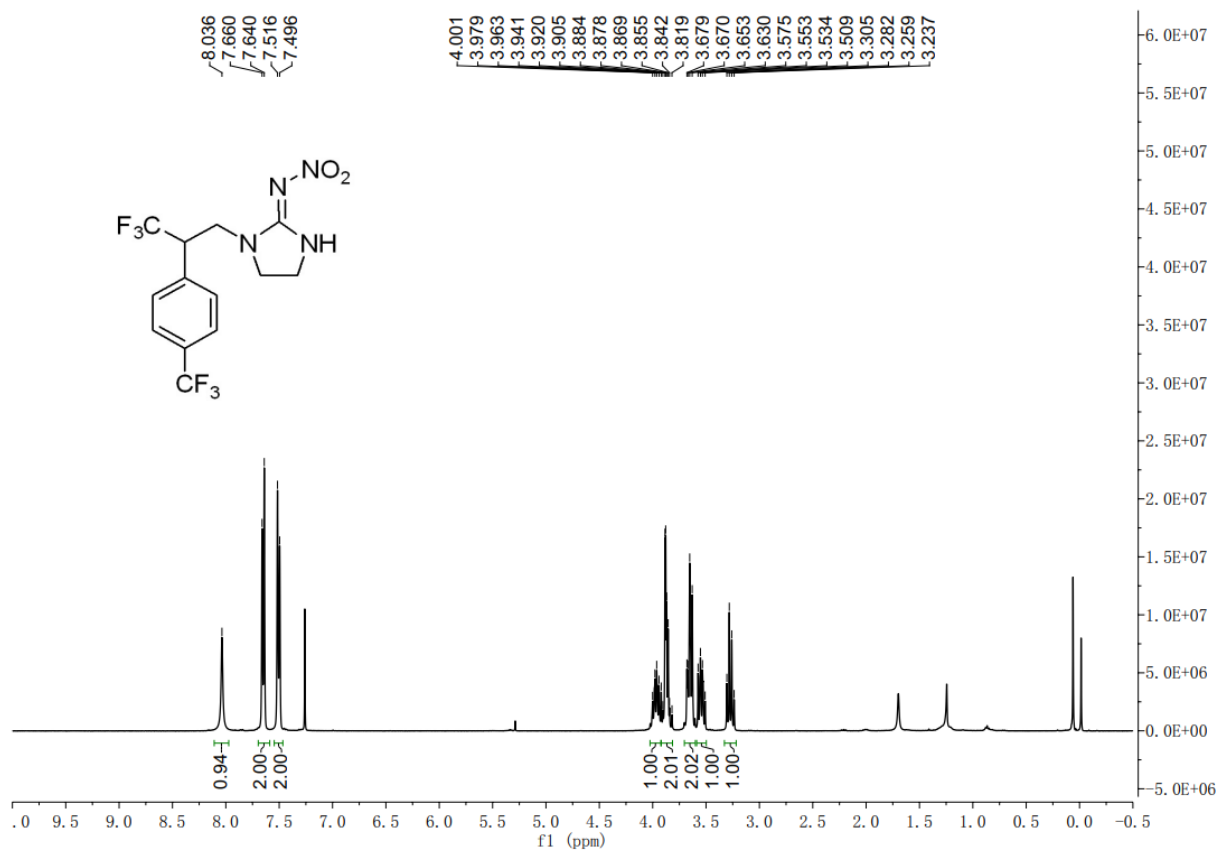

**<sup>13</sup>C NMR spectrum of 3ba (100 MHz, CDCl<sub>3</sub>)**

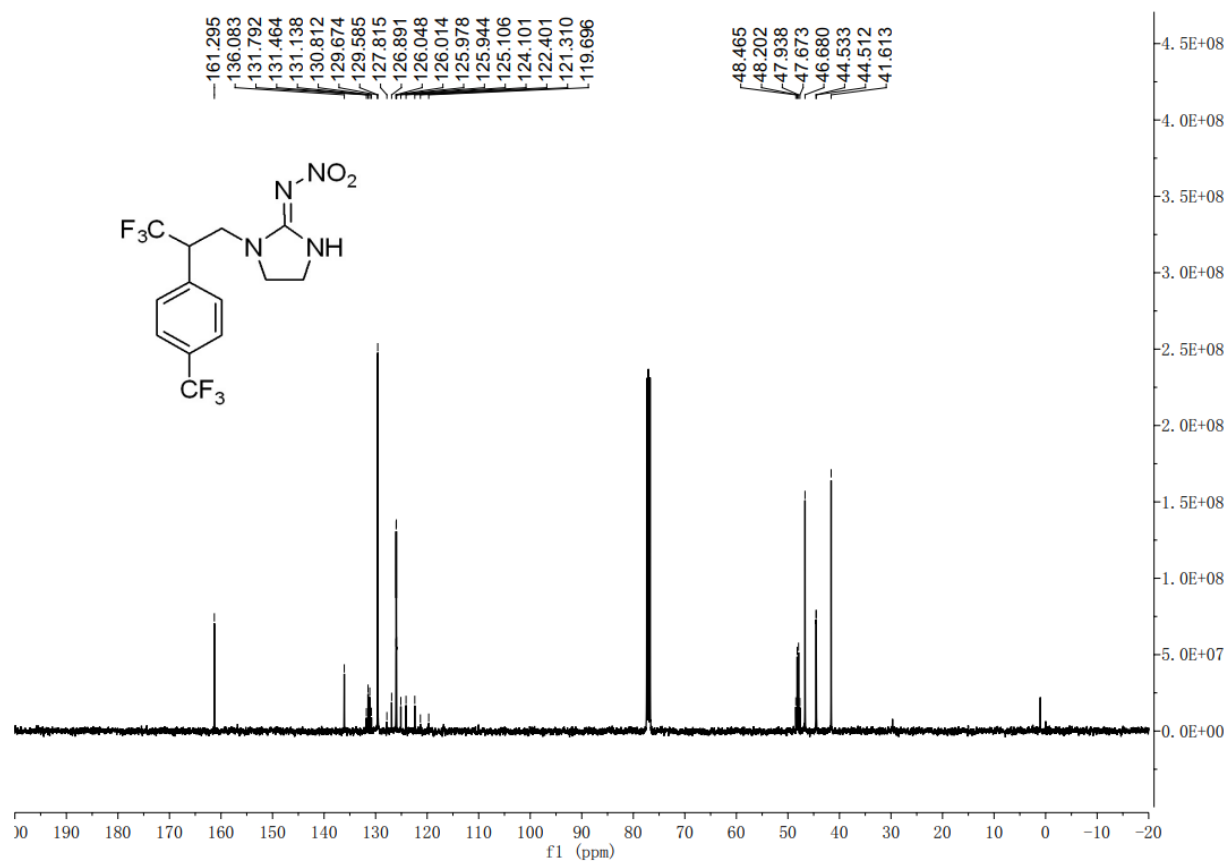

**$^{19}\text{F}$  NMR spectrum of 3ba (564 MHz,  $\text{CDCl}_3$ )**

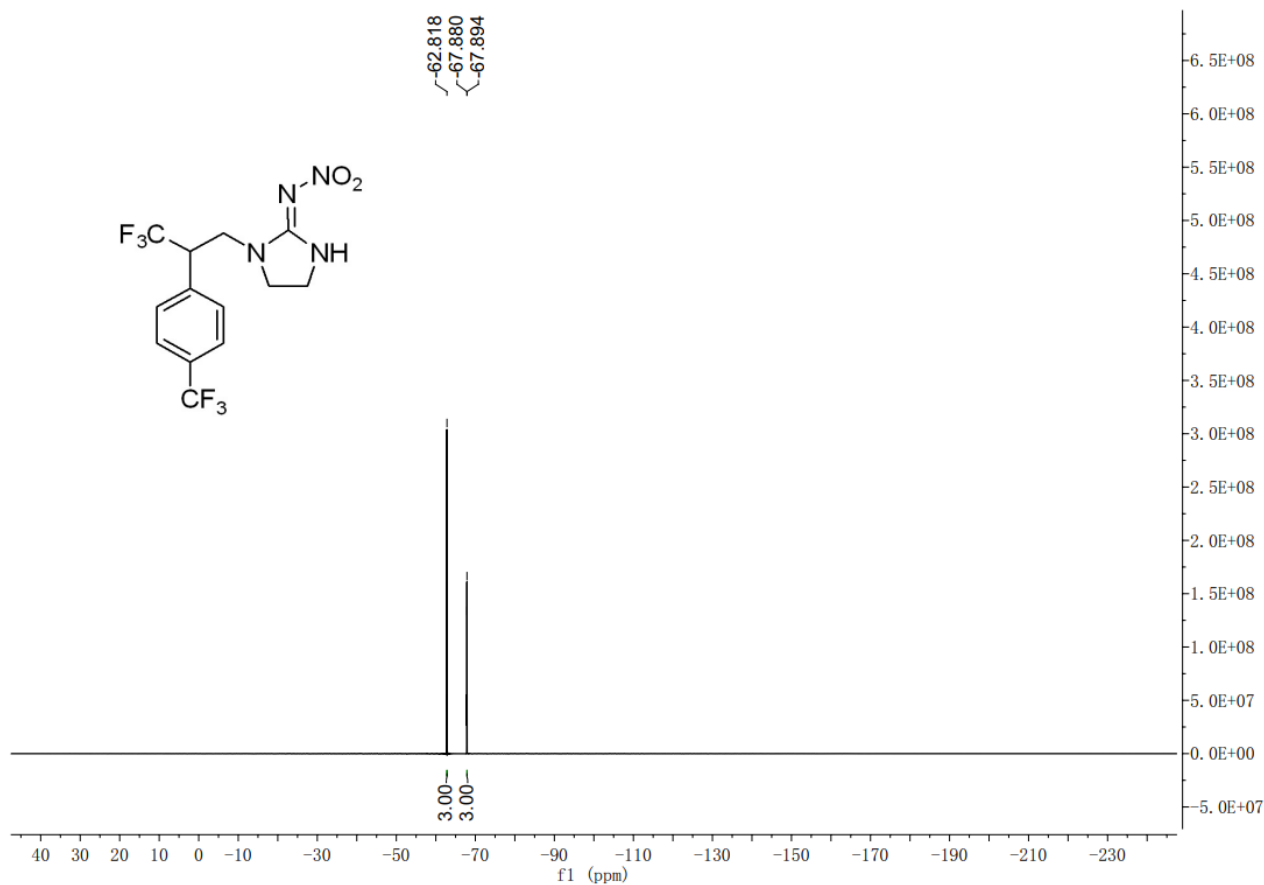

**HRMS (EI) spectrum of 3ba**

20221717 402 (6.700) Cm (402-(23+76))

TOF MS EI+  
1.25e4

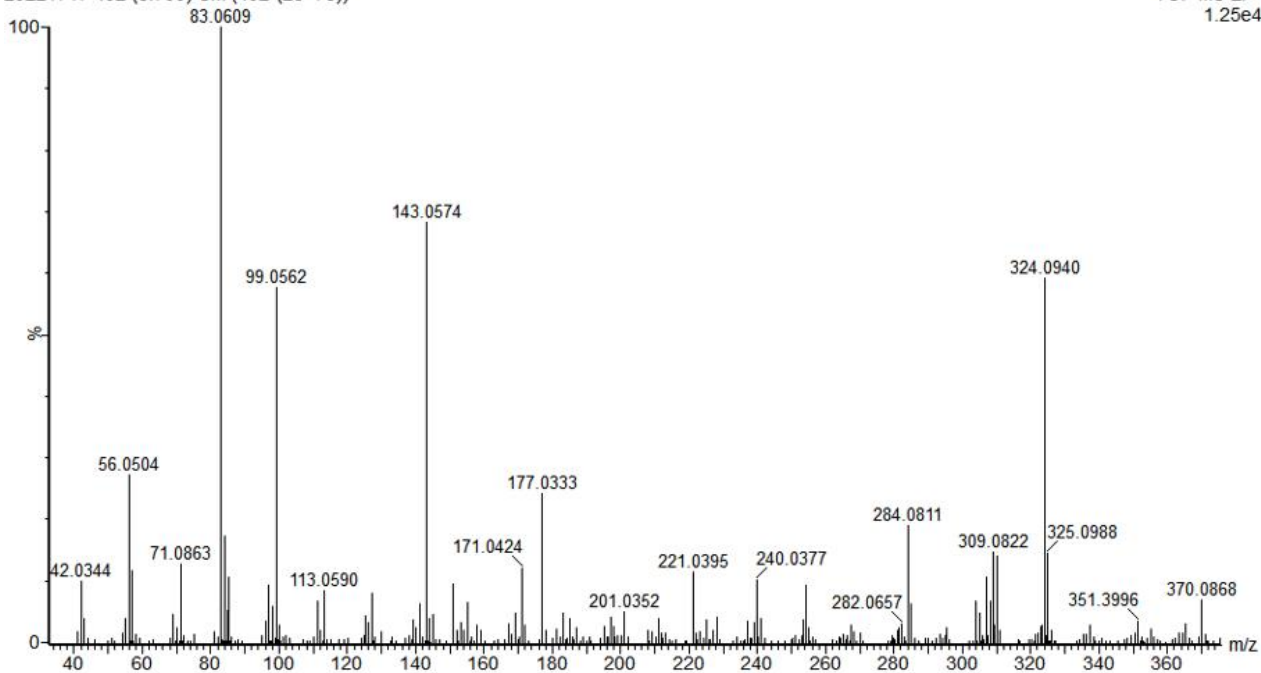

**<sup>1</sup>H NMR spectrum of 3a (400 MHz, CDCl<sub>3</sub>)**

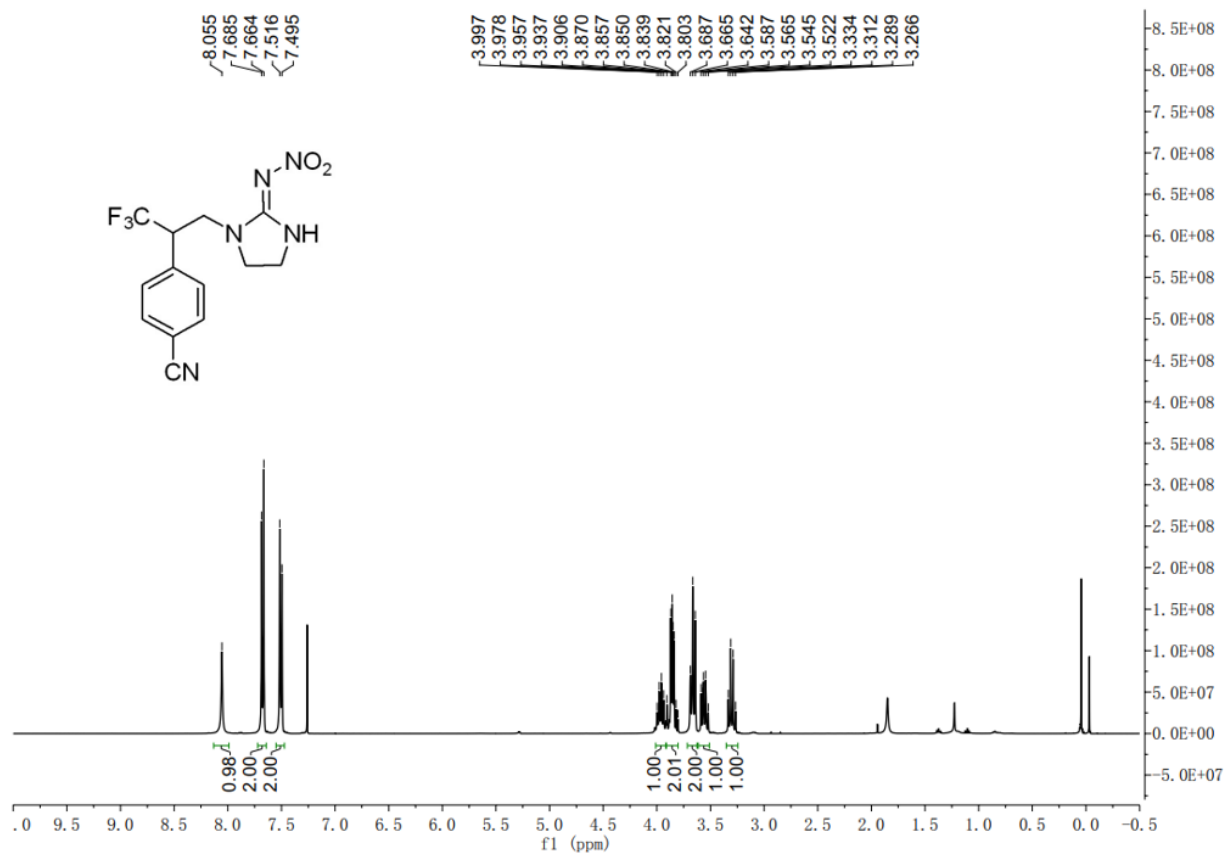

**<sup>13</sup>C NMR spectrum of 3a (100 MHz, CDCl<sub>3</sub>)**

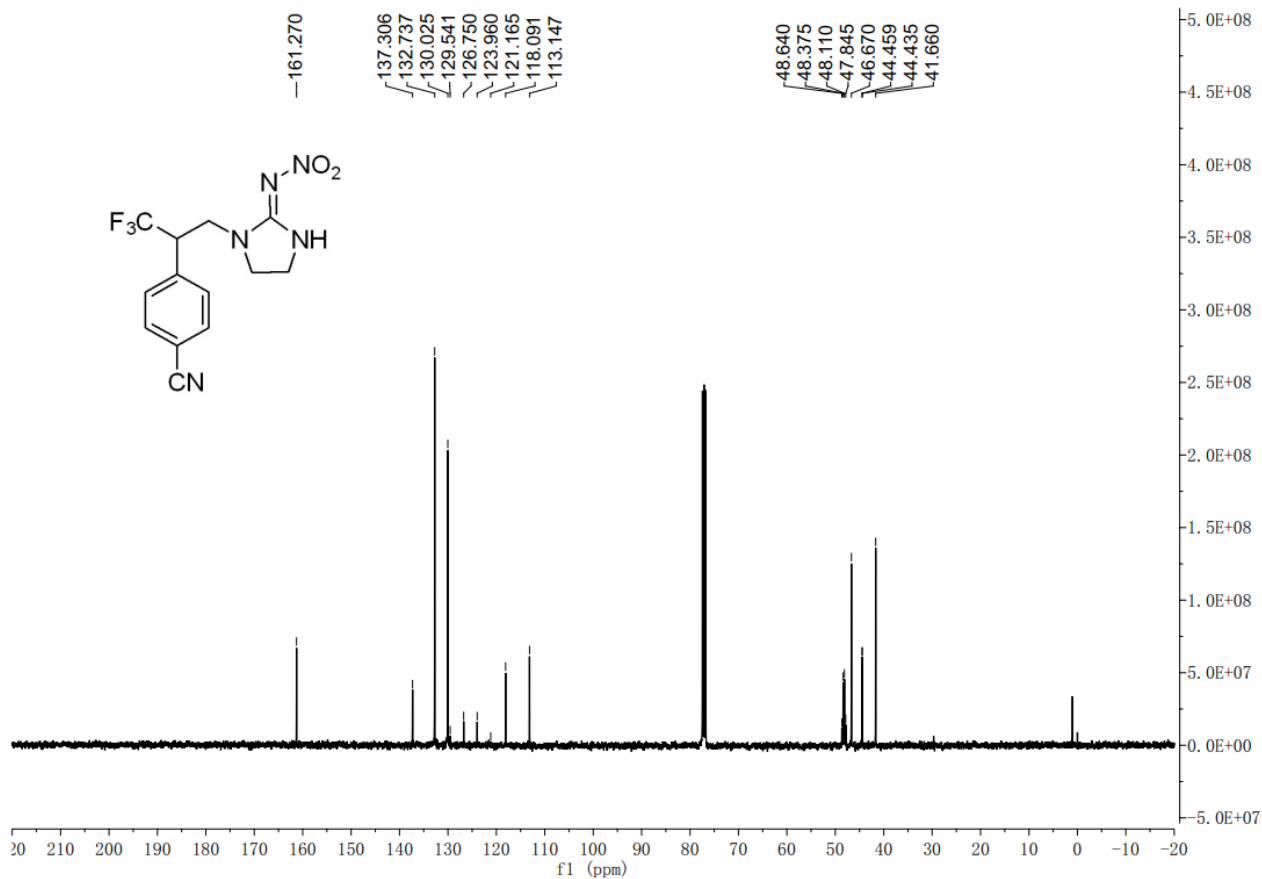

**$^{19}\text{F}$  NMR spectrum of 3ca (564 MHz,  $\text{CDCl}_3$ )**

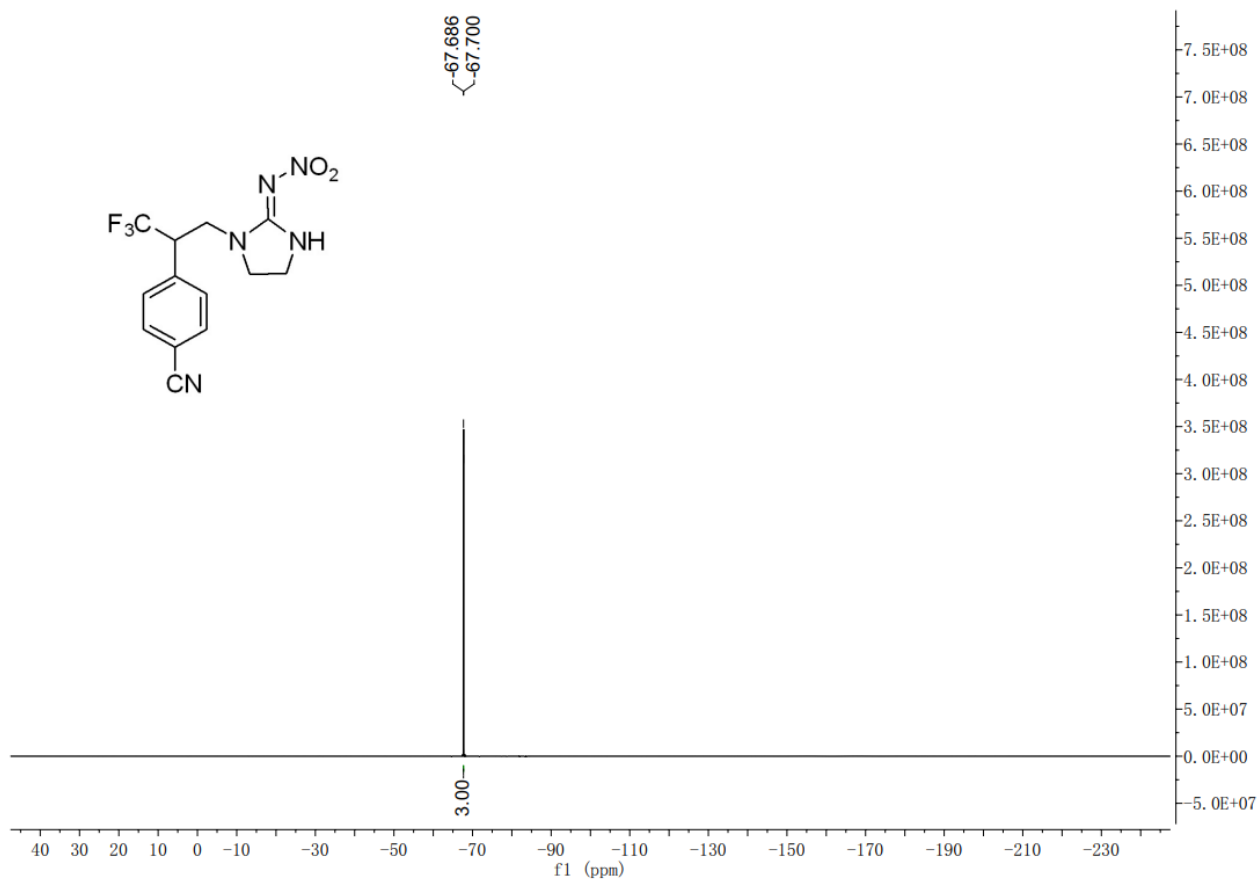

**HRMS (EI) spectrum of 3ca**

20221598 316 (5.267) Cm (316-(77+555))

TOF MS EI+  
1.98e4

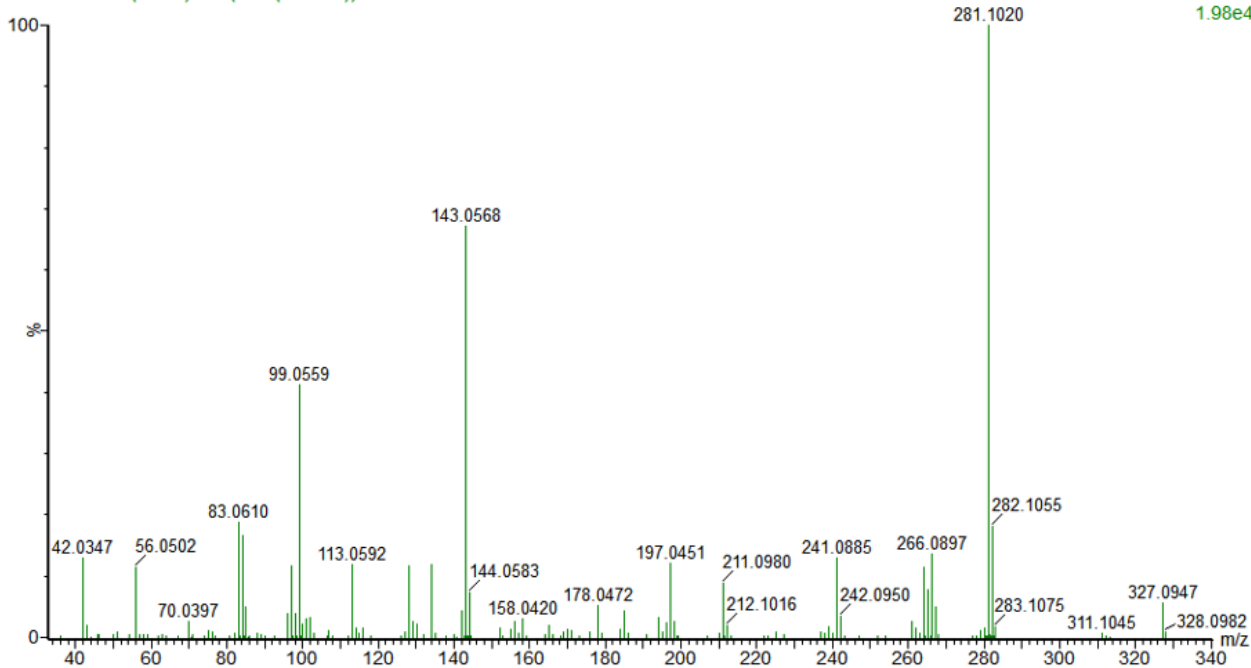

**<sup>1</sup>H NMR spectrum of 3da (400 MHz, CDCl<sub>3</sub>)**

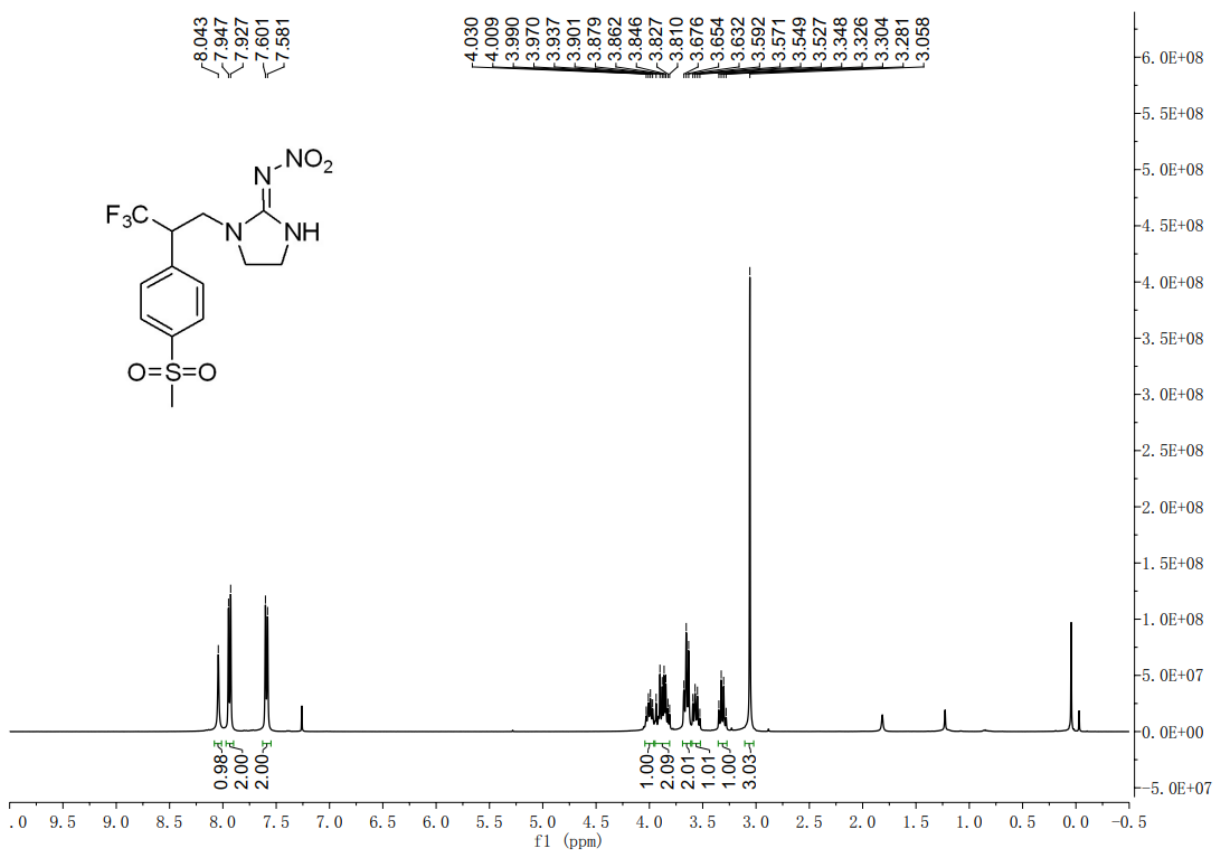

**<sup>13</sup>C NMR spectrum of 3da (100 MHz, CDCl<sub>3</sub>)**

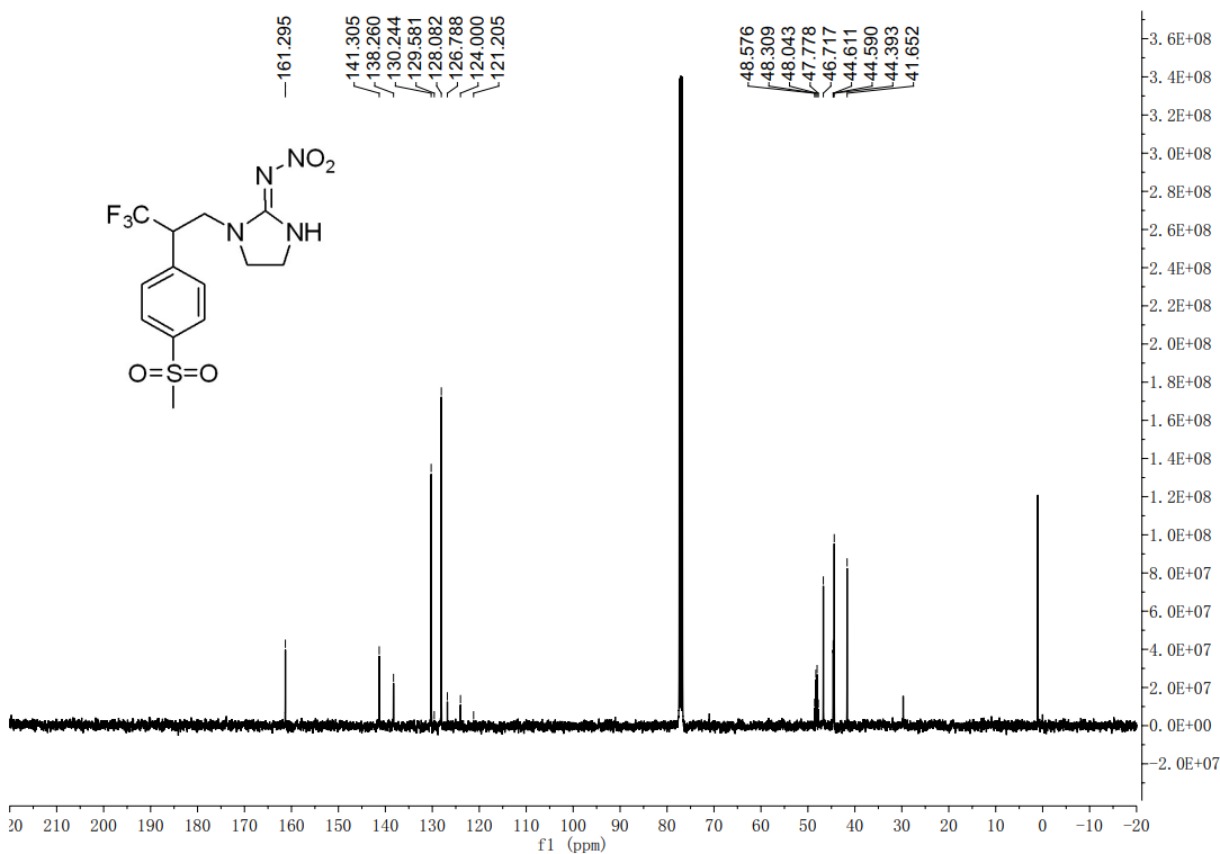



**<sup>19</sup>F NMR spectrum of 3da (564 MHz, CDCl<sub>3</sub>)**

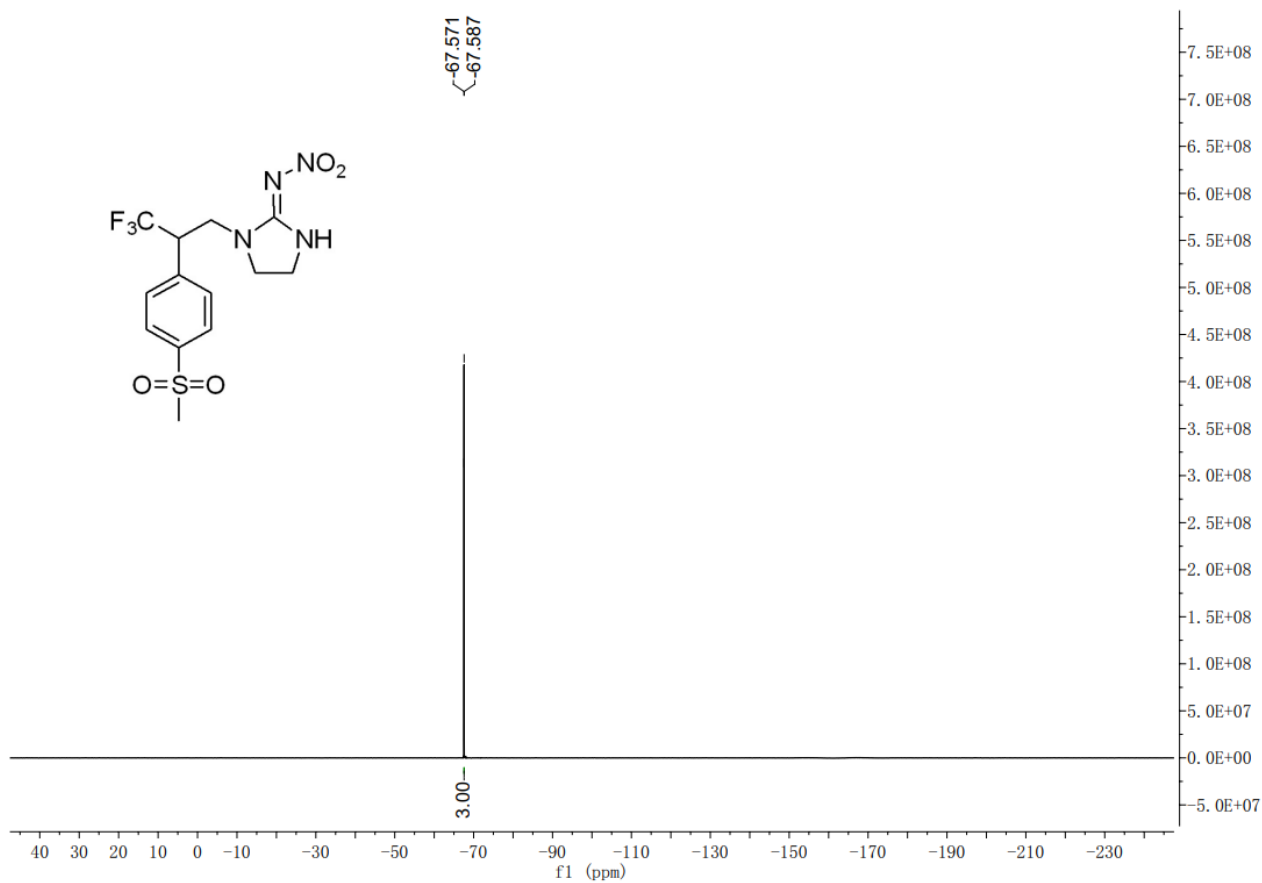

**HRMS (EI) spectrum of 3da**

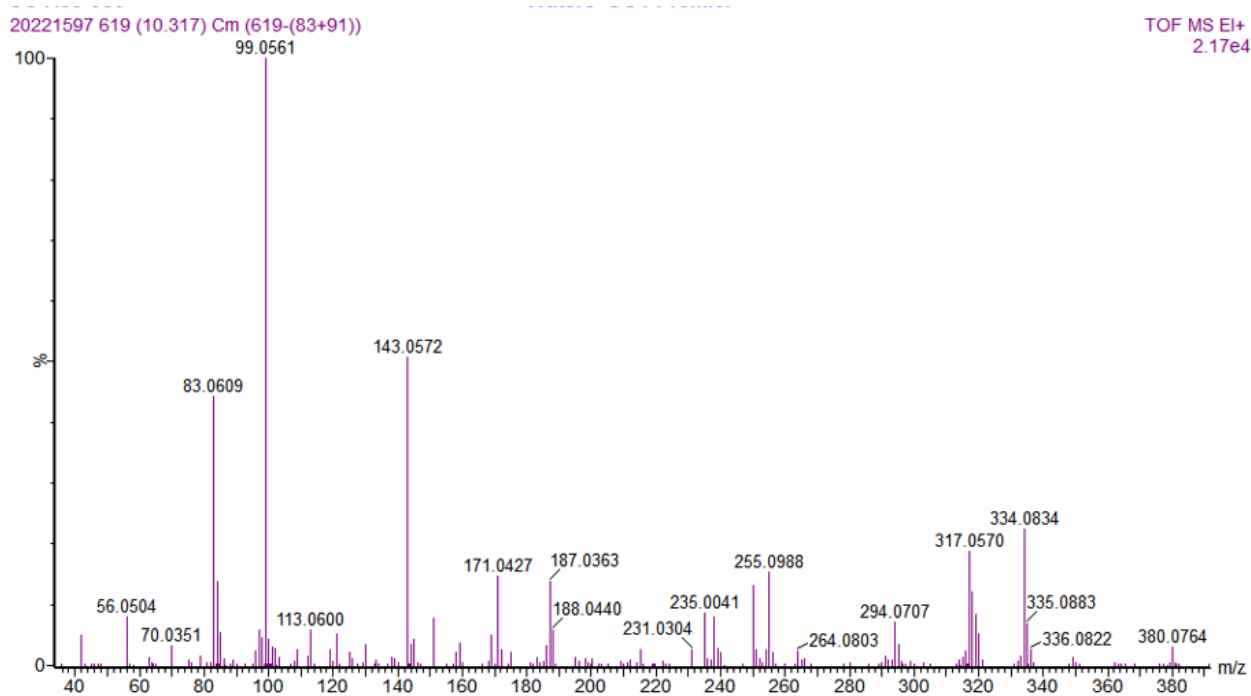

**<sup>1</sup>H NMR spectrum of 3ea (400 MHz, CDCl<sub>3</sub>)**

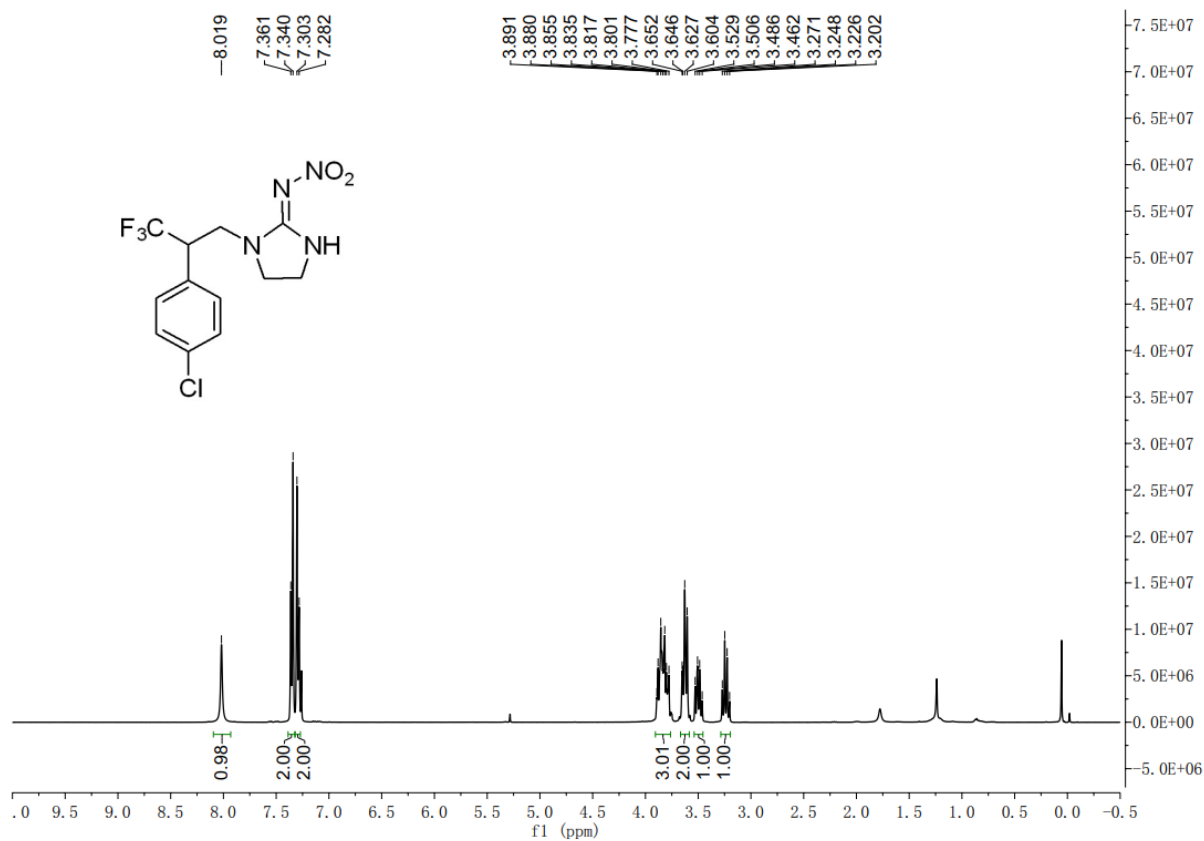

**<sup>13</sup>C NMR spectrum of 3ea (100 MHz, CDCl<sub>3</sub>)**

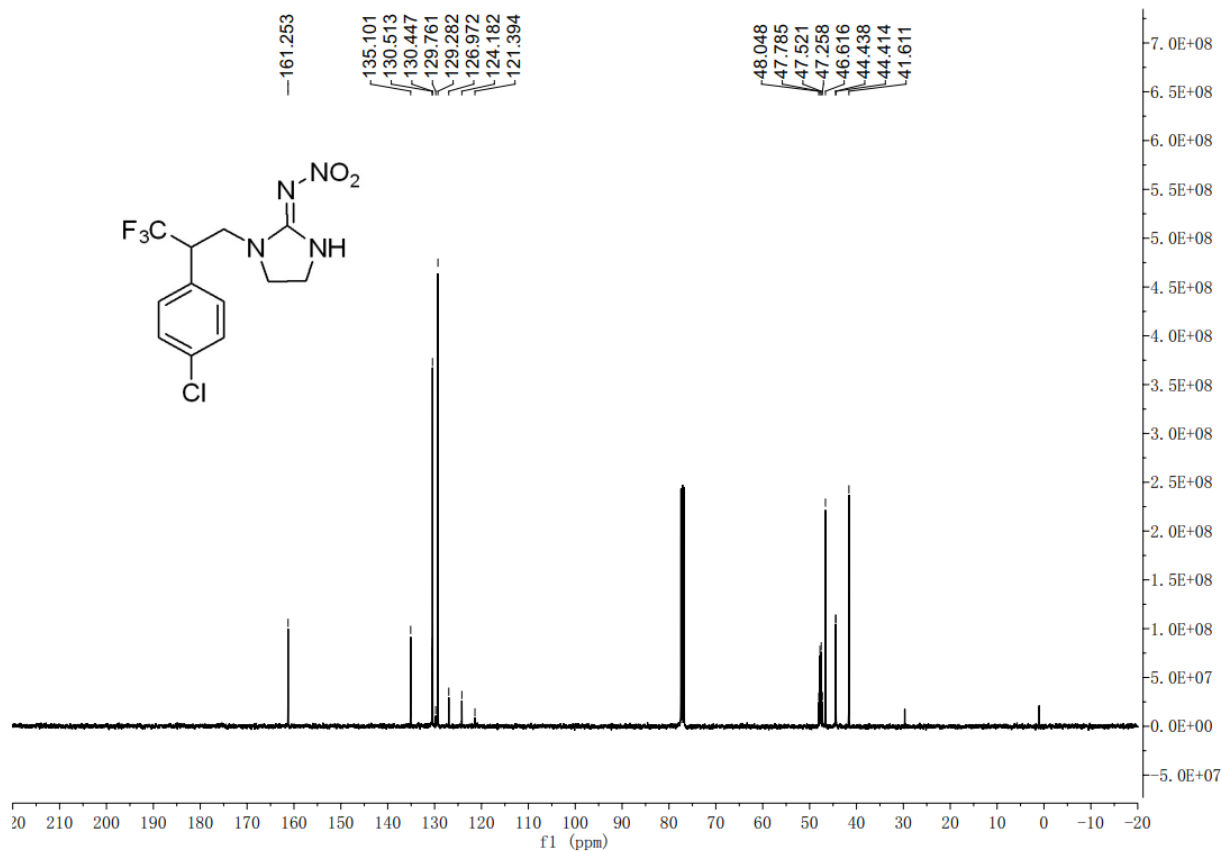

**$^{19}\text{F}$  NMR spectrum of 3ea (564 MHz,  $\text{CDCl}_3$ )**

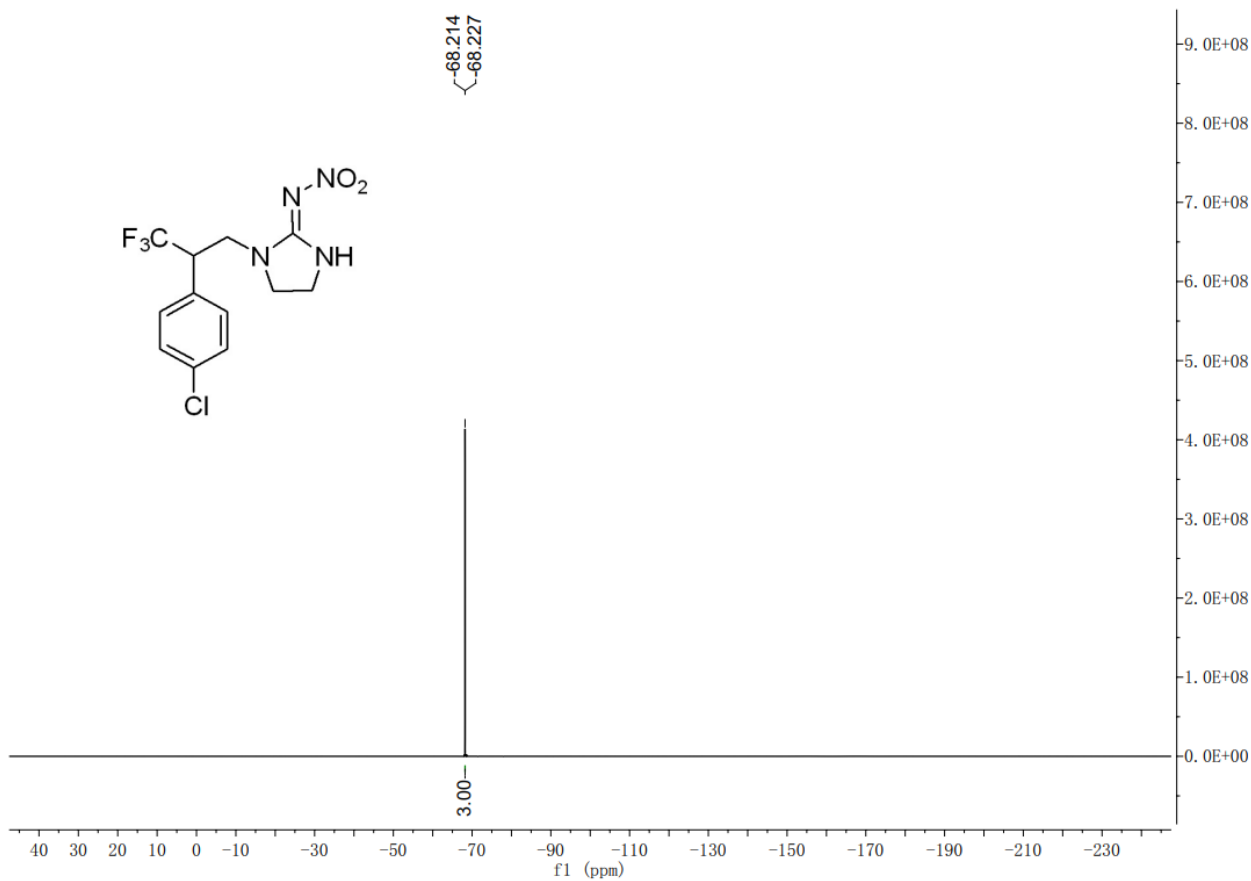

**HRMS (EI) spectrum of 3ea**

20221602 421 (7.019) Cm (421-(5+114))

TOF MS EI+  
1.86e4

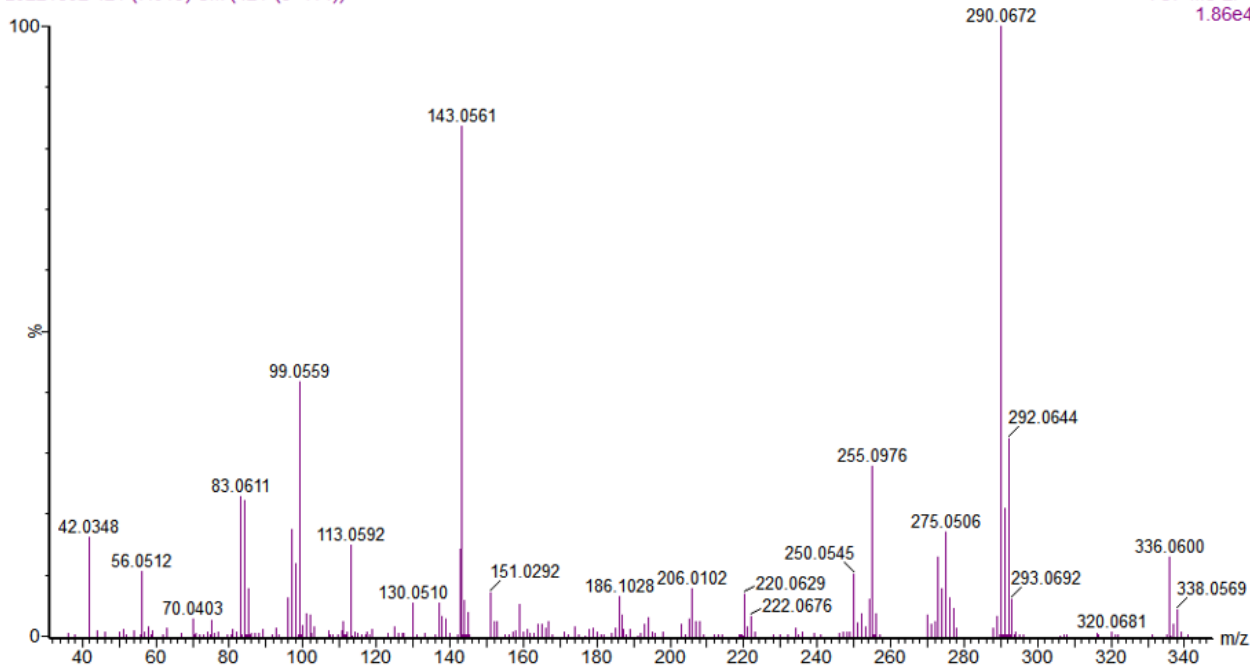

Chemical structure: Cc1ccc(cc1)C(C#N)C(F)(F)F

<sup>1</sup>H NMR spectrum (ppm) showing peaks and integrations:

- Peak at ~8.0 ppm: Integration 0.93
- Peak at ~7.2 ppm: Integration 2.00
- Peak at ~7.1 ppm: Integration 2.00
- Peak at ~3.8 ppm: Integration 1.01
- Peak at ~3.6 ppm: Integration 2.11
- Peak at ~3.4 ppm: Integration 2.04
- Peak at ~3.2 ppm: Integration 1.00
- Peak at ~3.0 ppm: Integration 1.00
- Peak at ~2.4 ppm: Integration 3.01
- Peak at ~0.0 ppm: Integration 1.00

Chemical shift values (ppm) for the inset:

- 3.937, 3.917, 3.907, 3.825, 3.802, 3.788, 3.779, 3.757, 3.734, 3.719, 3.704, 3.630, 3.609, 3.593, 3.584, 3.568, 3.545, 3.474, 3.455, 3.430, 3.407, 3.384, 3.361, 3.161

Chemical structure: Cc1ccc(cc1)C(F)(F)FCCN2C=NC(=O)N2

<sup>13</sup>C NMR peaks (ppm):

- 161.297
- 138.926
- 130.029
- 129.745
- 128.938
- 128.884
- 127.240
- 124.452
- 121.665
- 48.287
- 48.026
- 47.764
- 47.507
- 46.619
- 44.574
- 44.550
- 41.549
- 21.133

**$^{19}\text{F}$  NMR spectrum of 3fa (564 MHz,  $\text{CDCl}_3$ )**

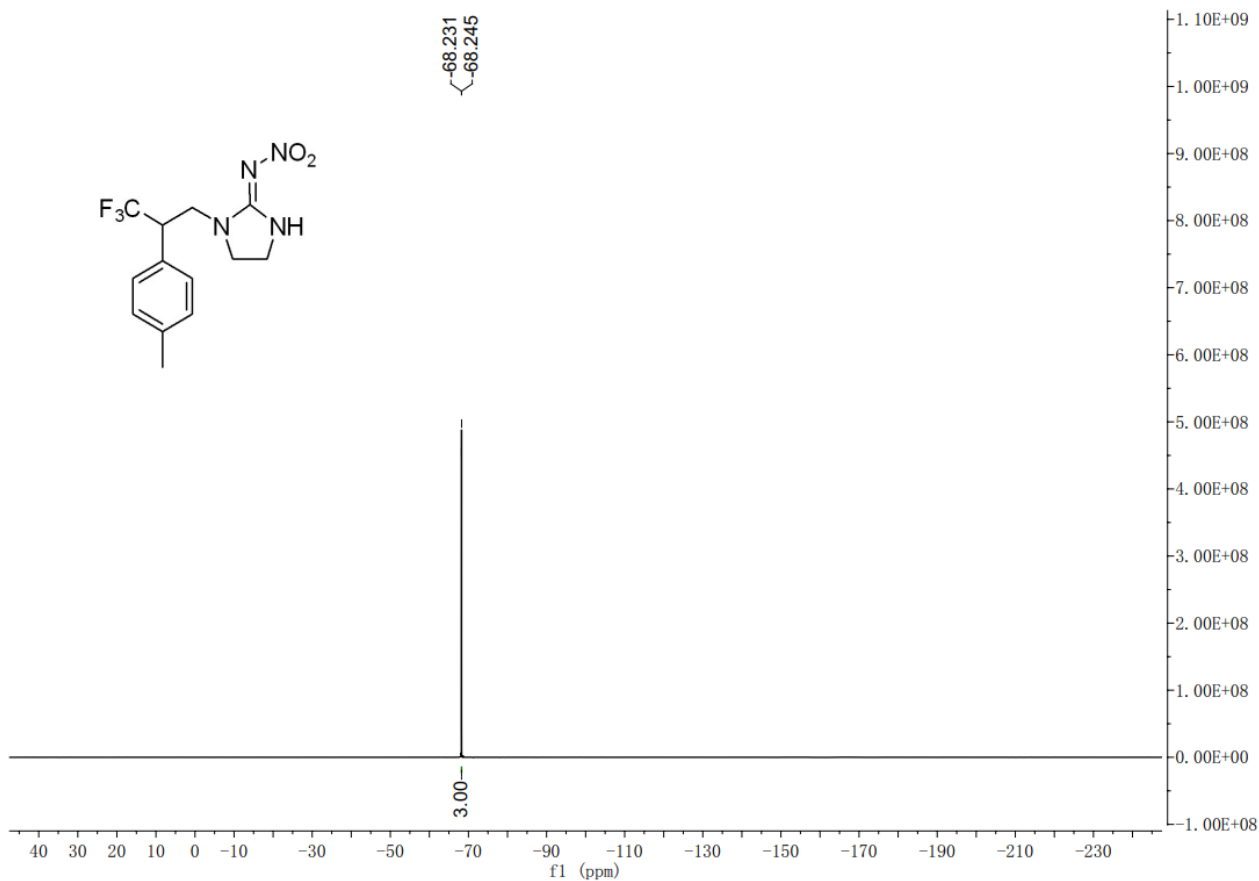

**HRMS (EI) spectrum of 3fa**

20221595 473 (7.886) Cm (473-(33+129))

TOF MS EI+  
1.82e4

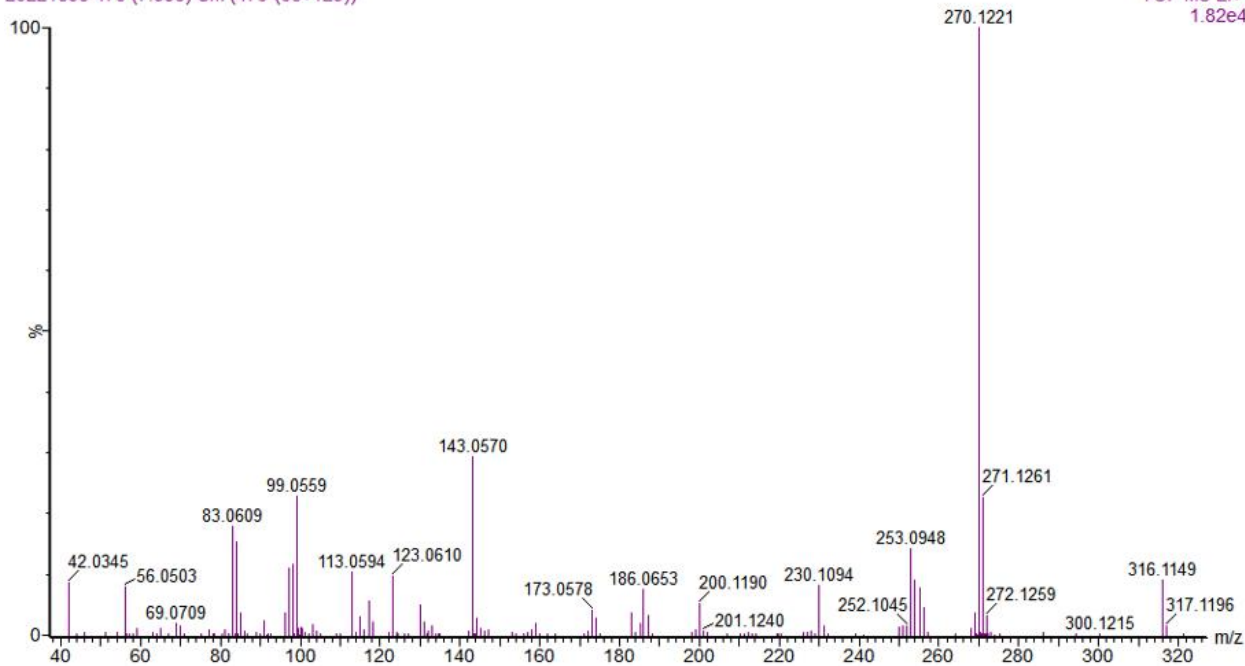

**<sup>1</sup>H NMR spectrum of 3ga (400 MHz, CDCl<sub>3</sub>)**

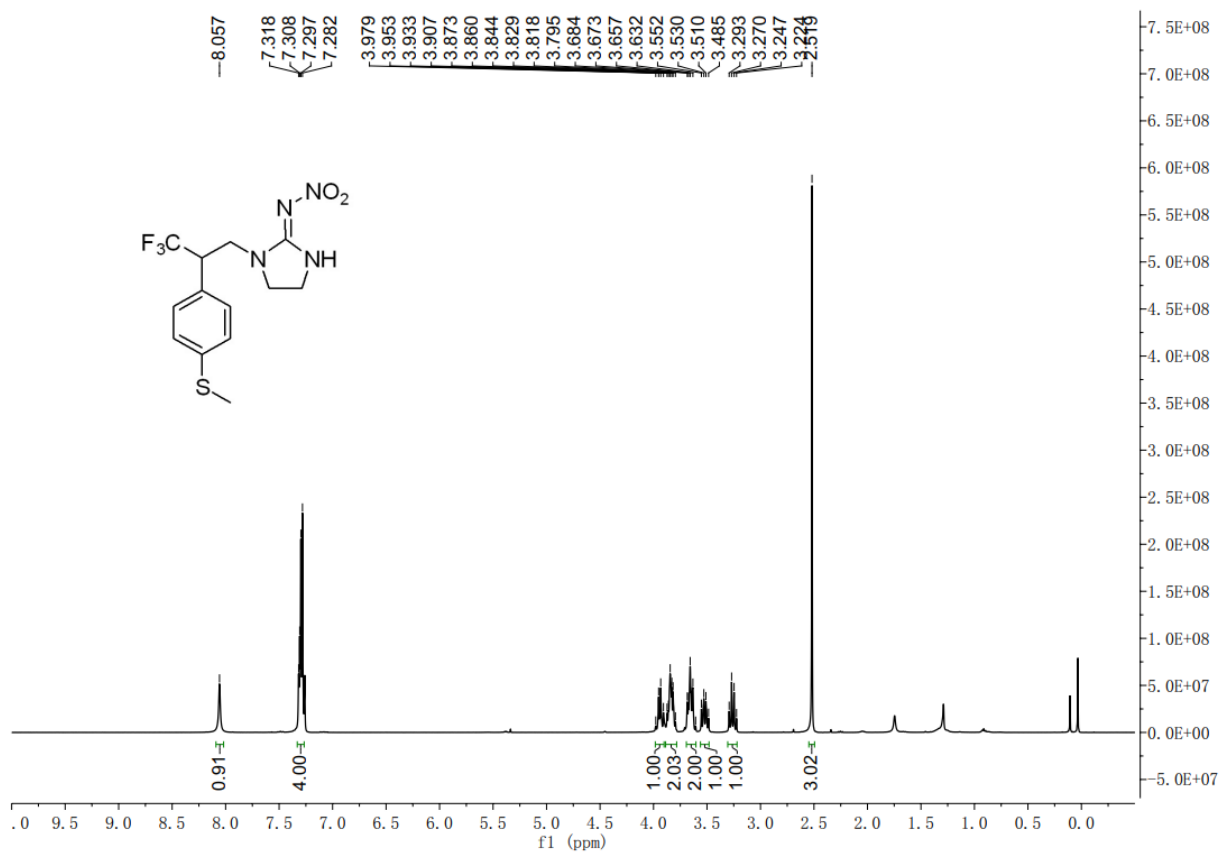

**<sup>13</sup>C NMR spectrum of 3ga (100 MHz, CDCl<sub>3</sub>)**

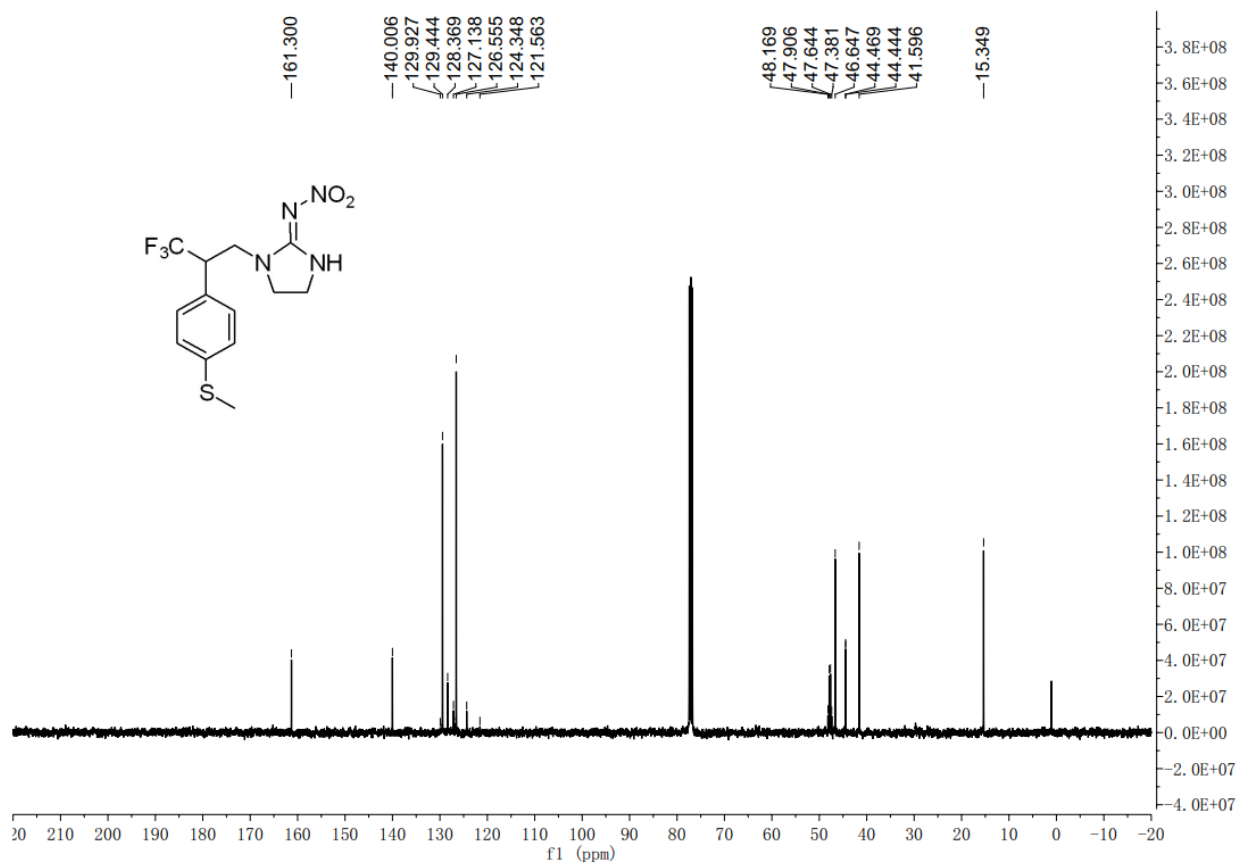

**$^{19}\text{F}$  NMR spectrum of 3ga (564 MHz,  $\text{CDCl}_3$ )**

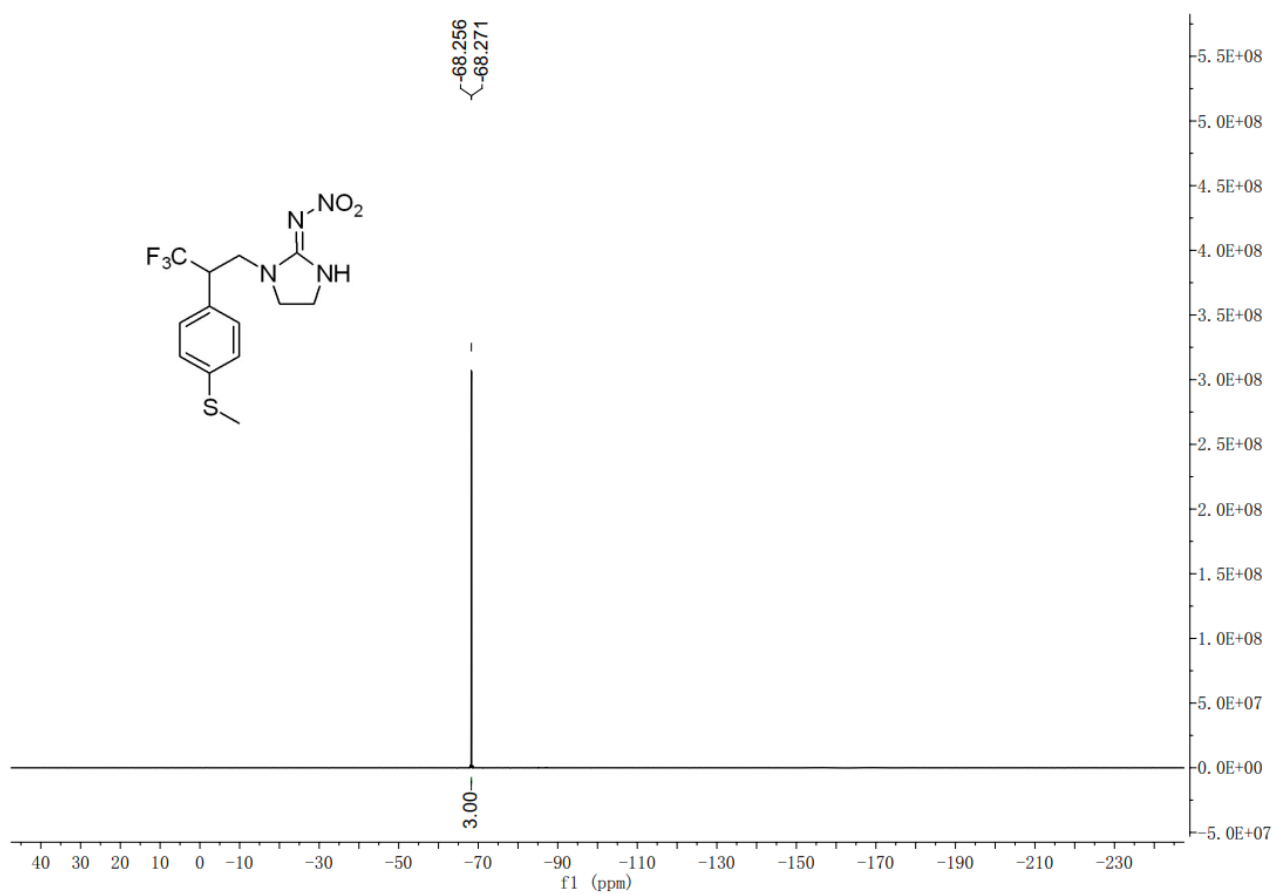

**HRMS (EI) spectrum of 3ga**

20221721 548 (9.133) Cm (548-(20+52))

TOF MS EI+  
2.23e4

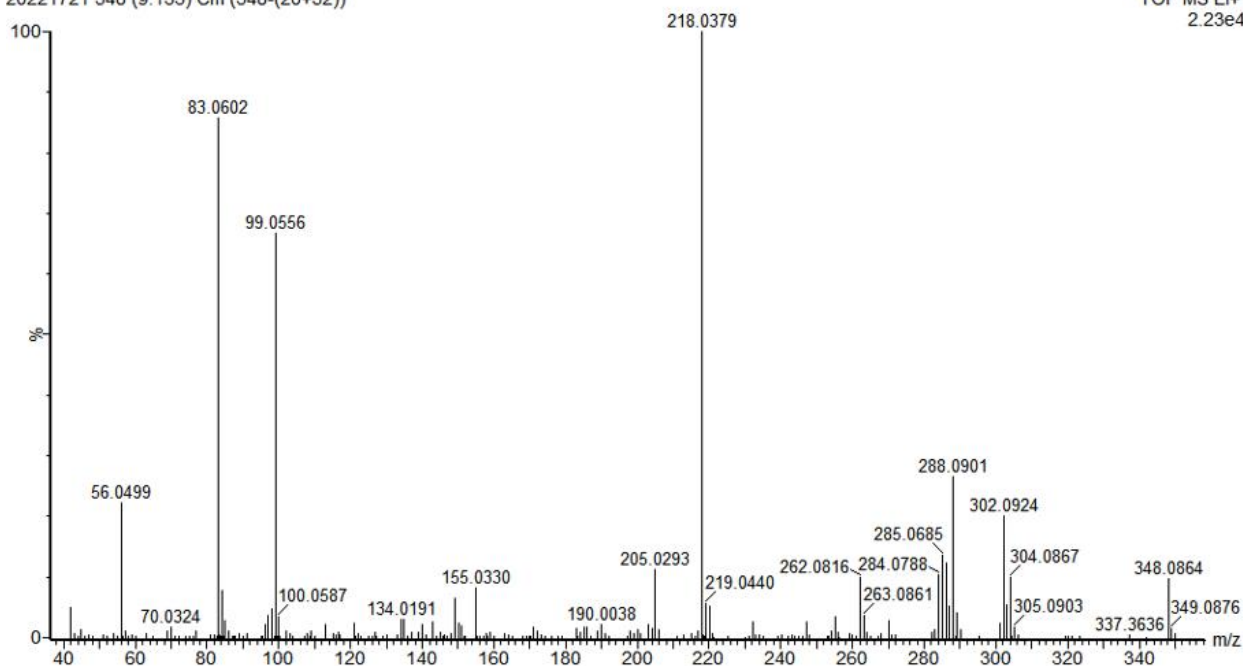

**<sup>1</sup>H NMR spectrum of 3ha (400 MHz, CDCl<sub>3</sub>)**

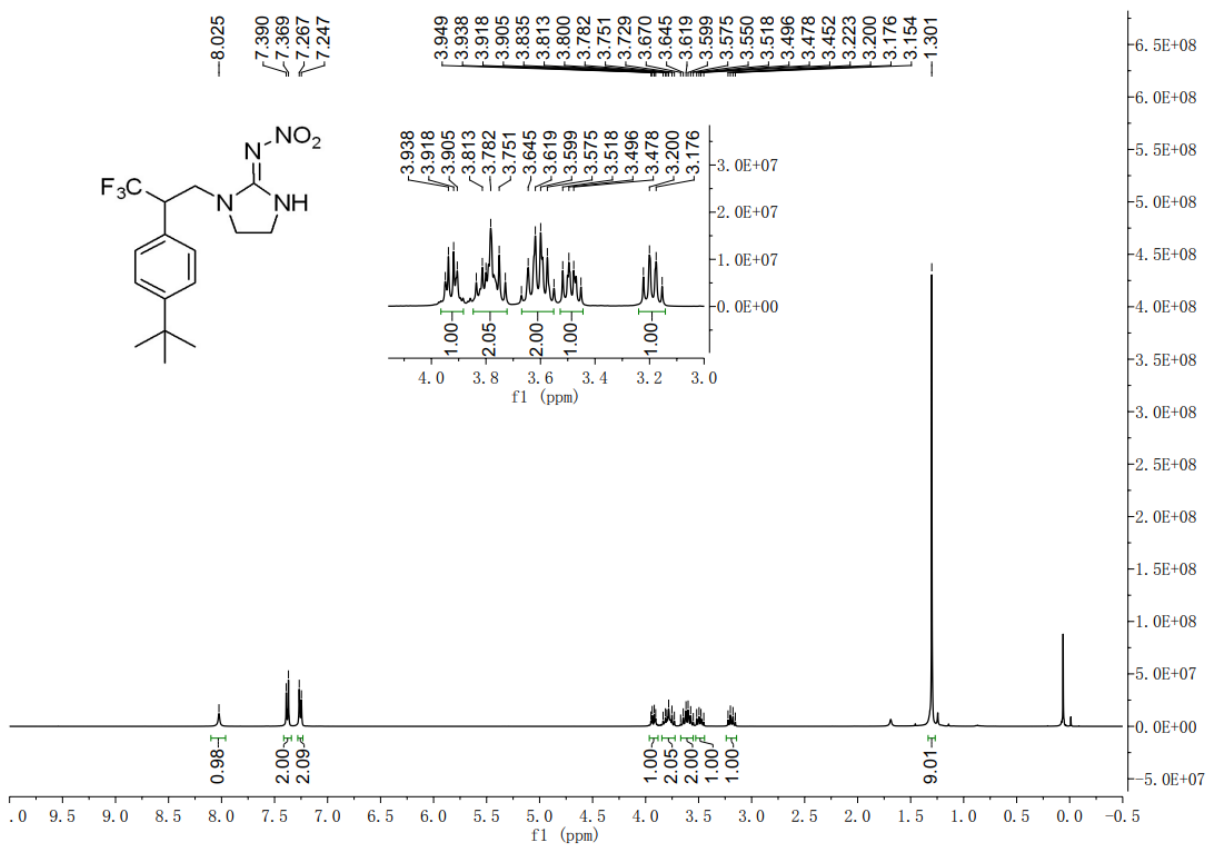

**<sup>13</sup>C NMR spectrum of 3ha (100 MHz, CDCl<sub>3</sub>)**

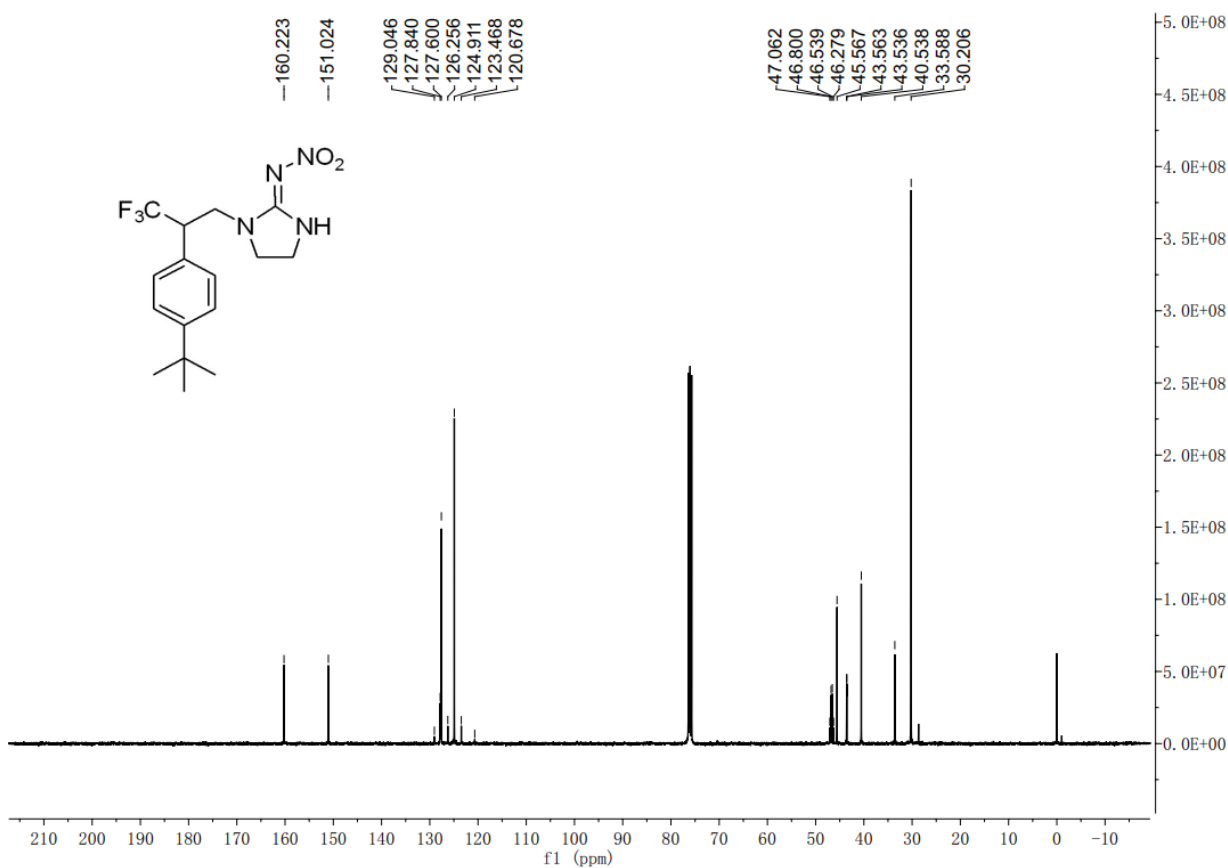



**$^{19}\text{F}$  NMR spectrum of 3ha (564 MHz,  $\text{CDCl}_3$ )**

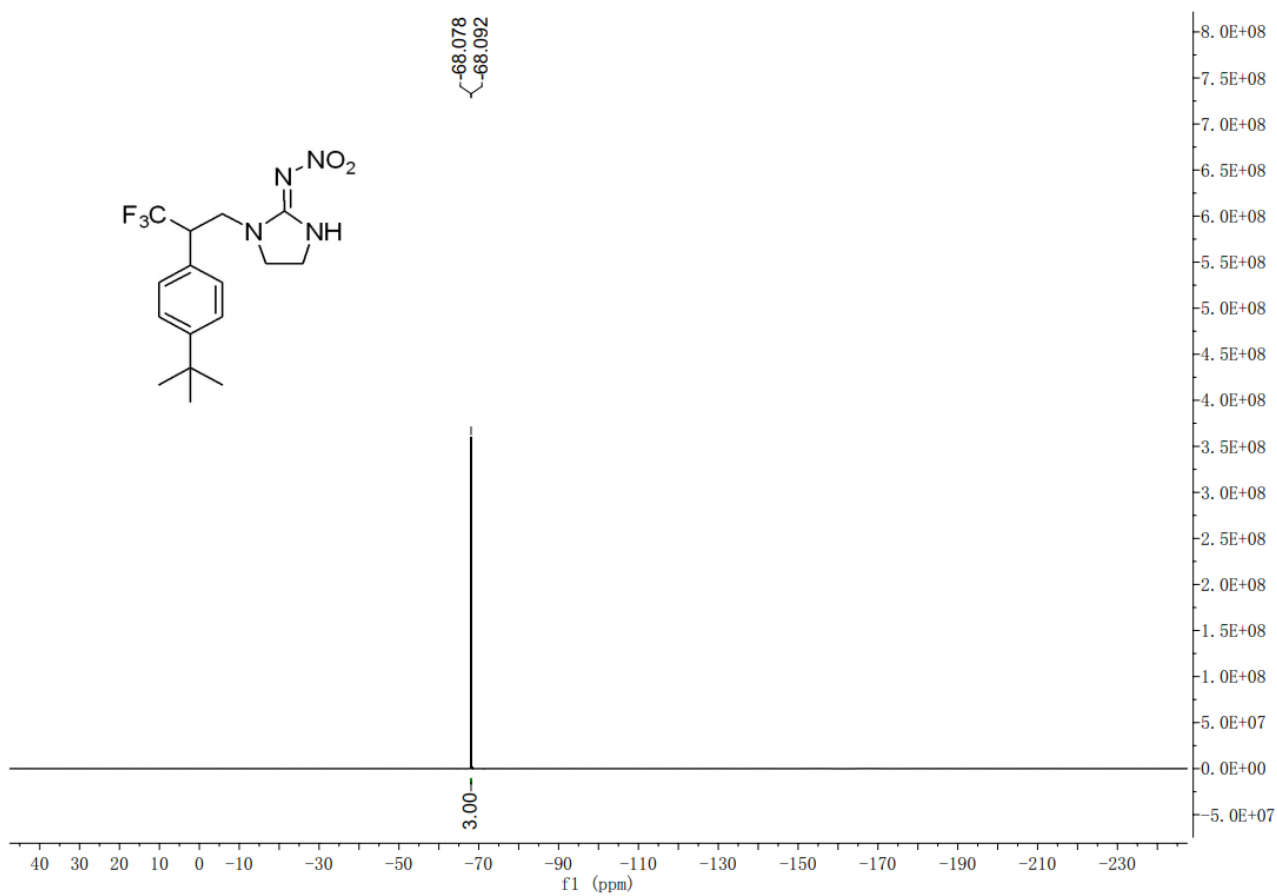

**HRMS (EI) spectrum of 3ha**

20221596 410 (6.836) Cm (410-(54+97))

TOF MS EI+  
1.68e4

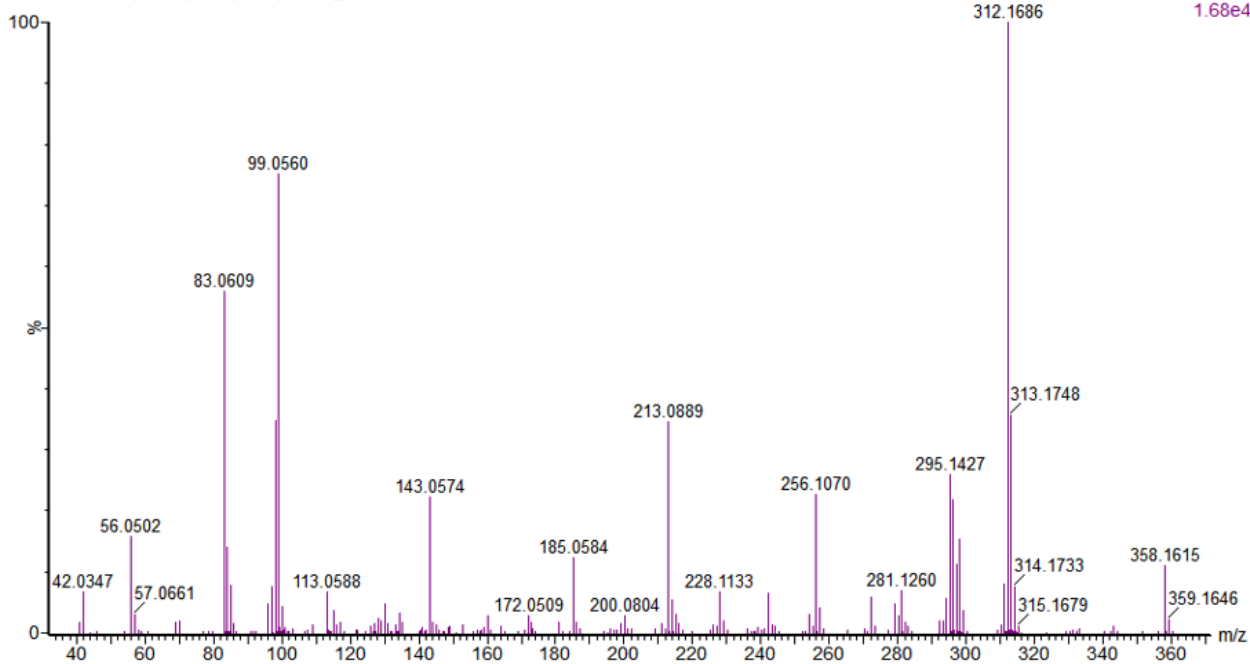

**<sup>1</sup>H NMR spectrum of 3ia (400 MHz, CDCl<sub>3</sub>)**

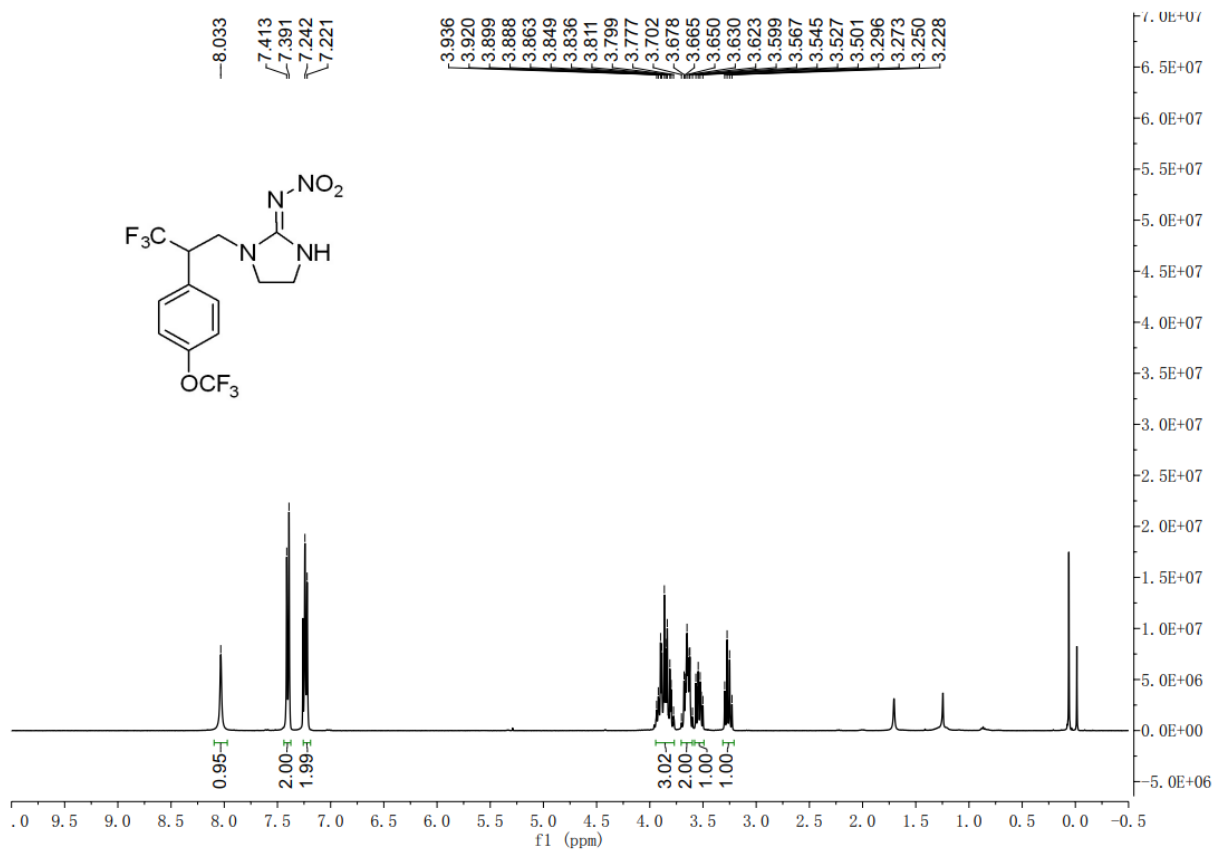

**<sup>13</sup>C NMR spectrum of 3ia (100 MHz, CDCl<sub>3</sub>)**

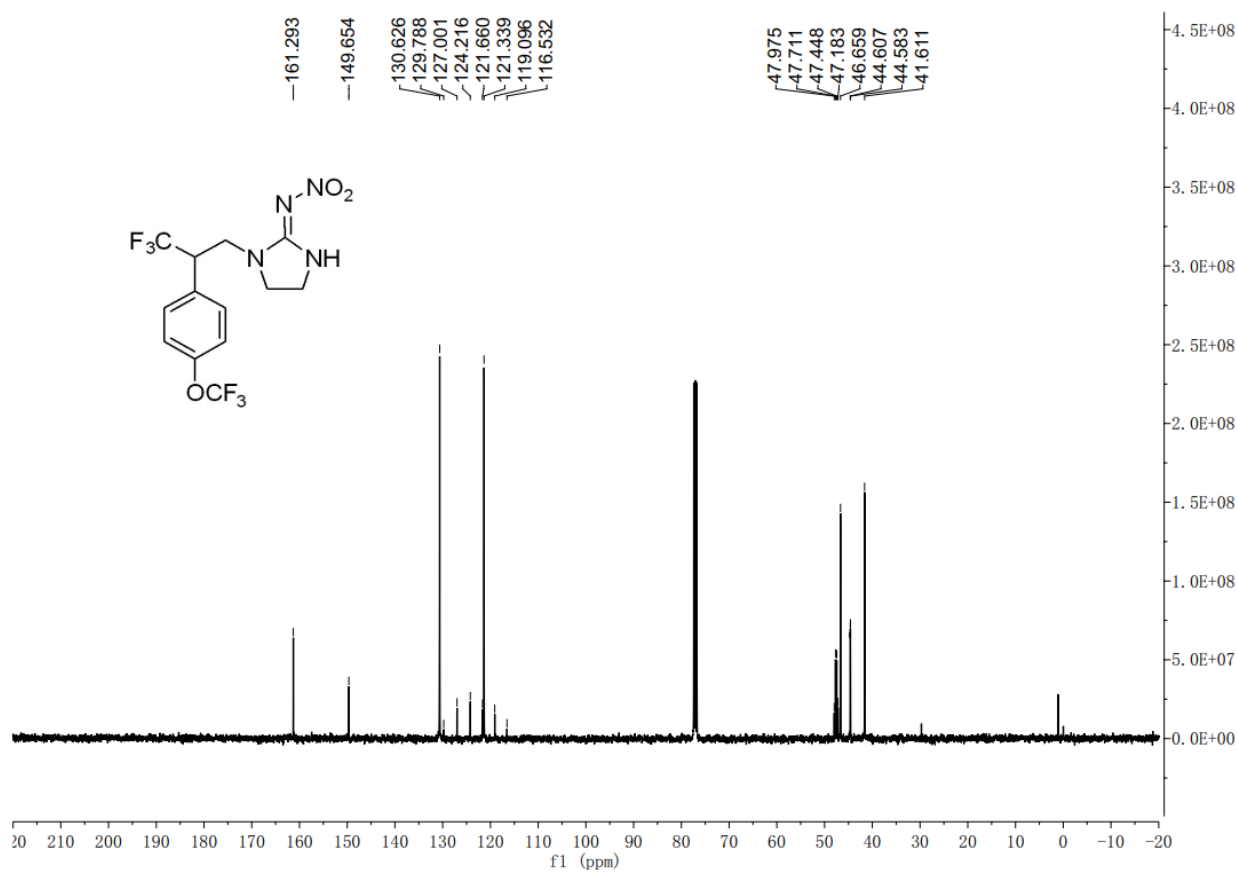

**$^{19}\text{F}$  NMR spectrum of 3ia (564 MHz,  $\text{CDCl}_3$ )**

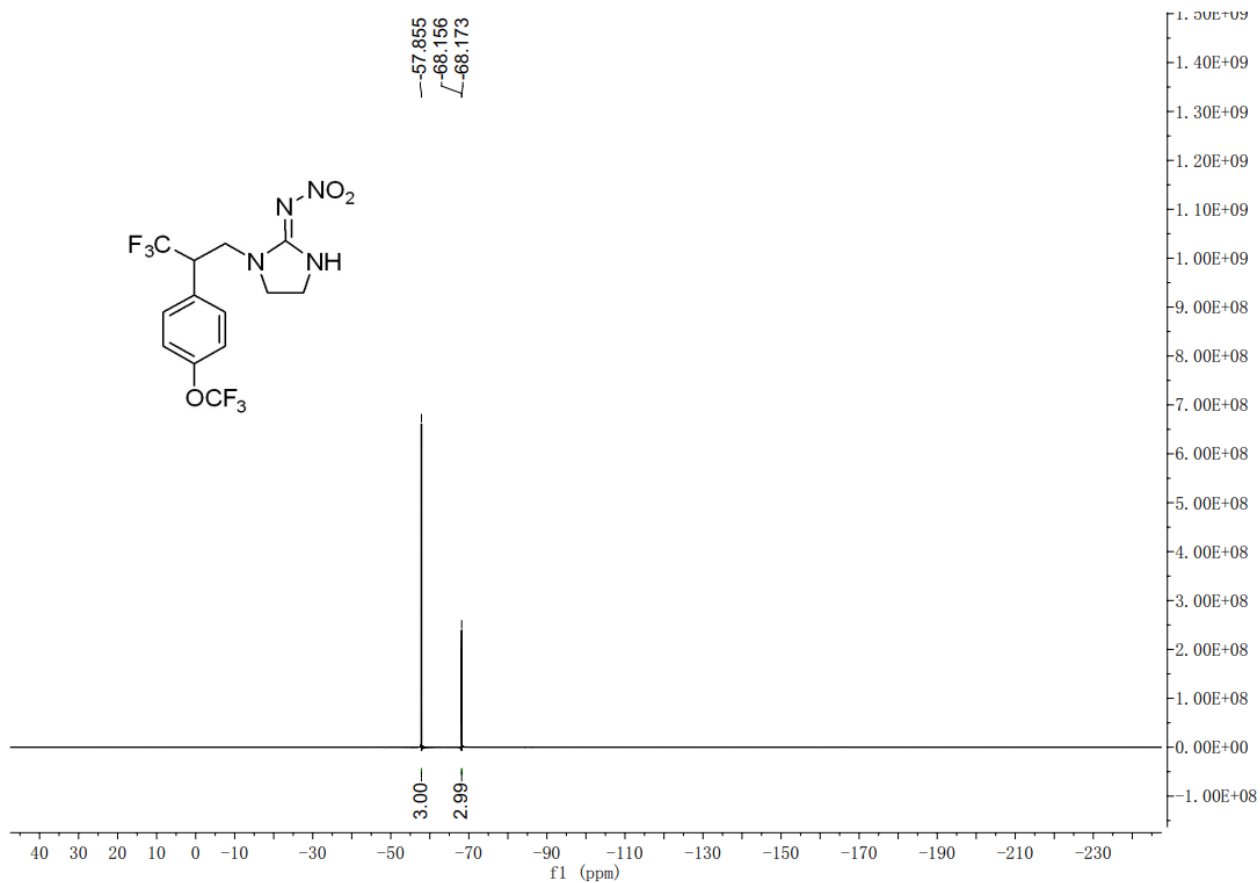

**HRMS (EI) spectrum of 3ia**

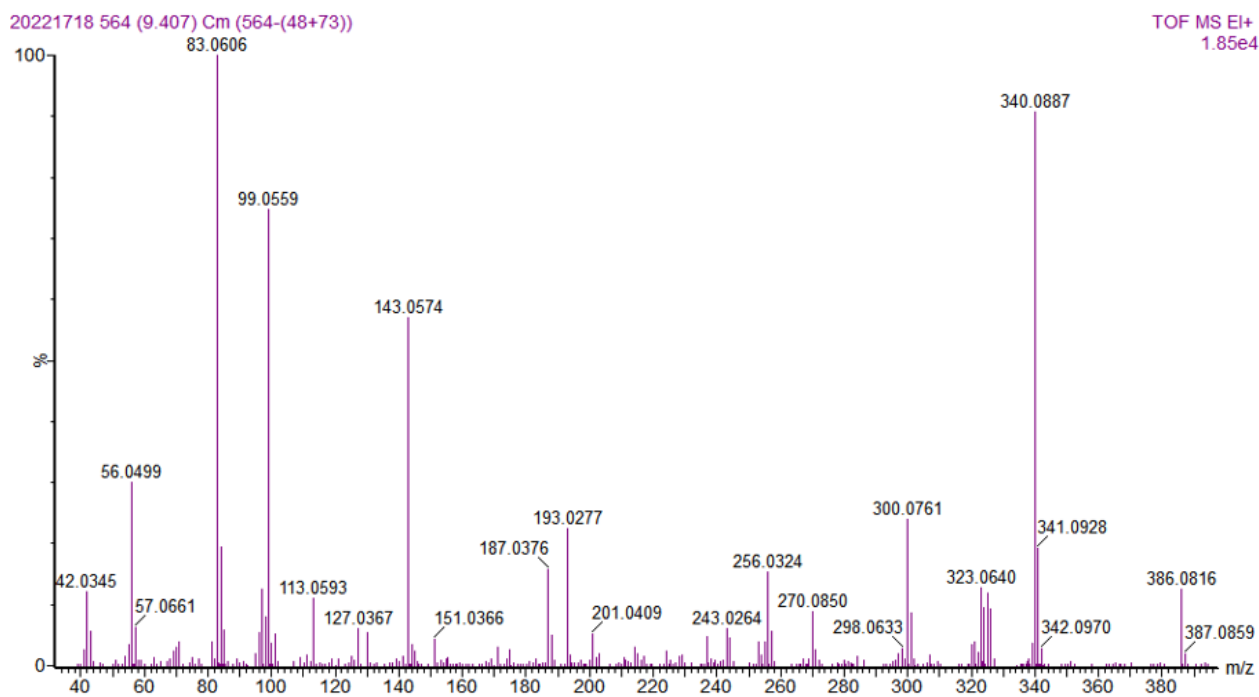

**<sup>1</sup>H NMR spectrum of 3ja (400 MHz, CDCl<sub>3</sub>)**

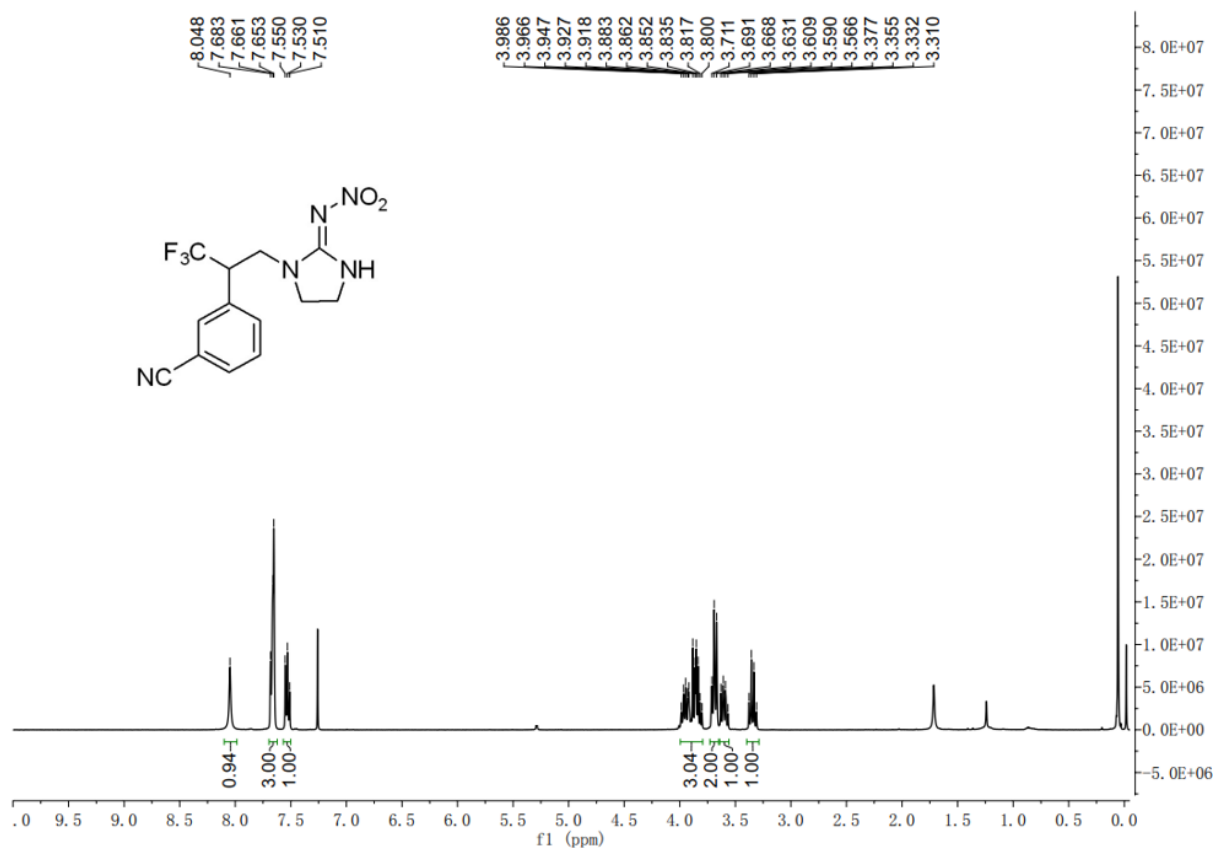

**<sup>13</sup>C NMR spectrum of 3ja (100 MHz, CDCl<sub>3</sub>)**

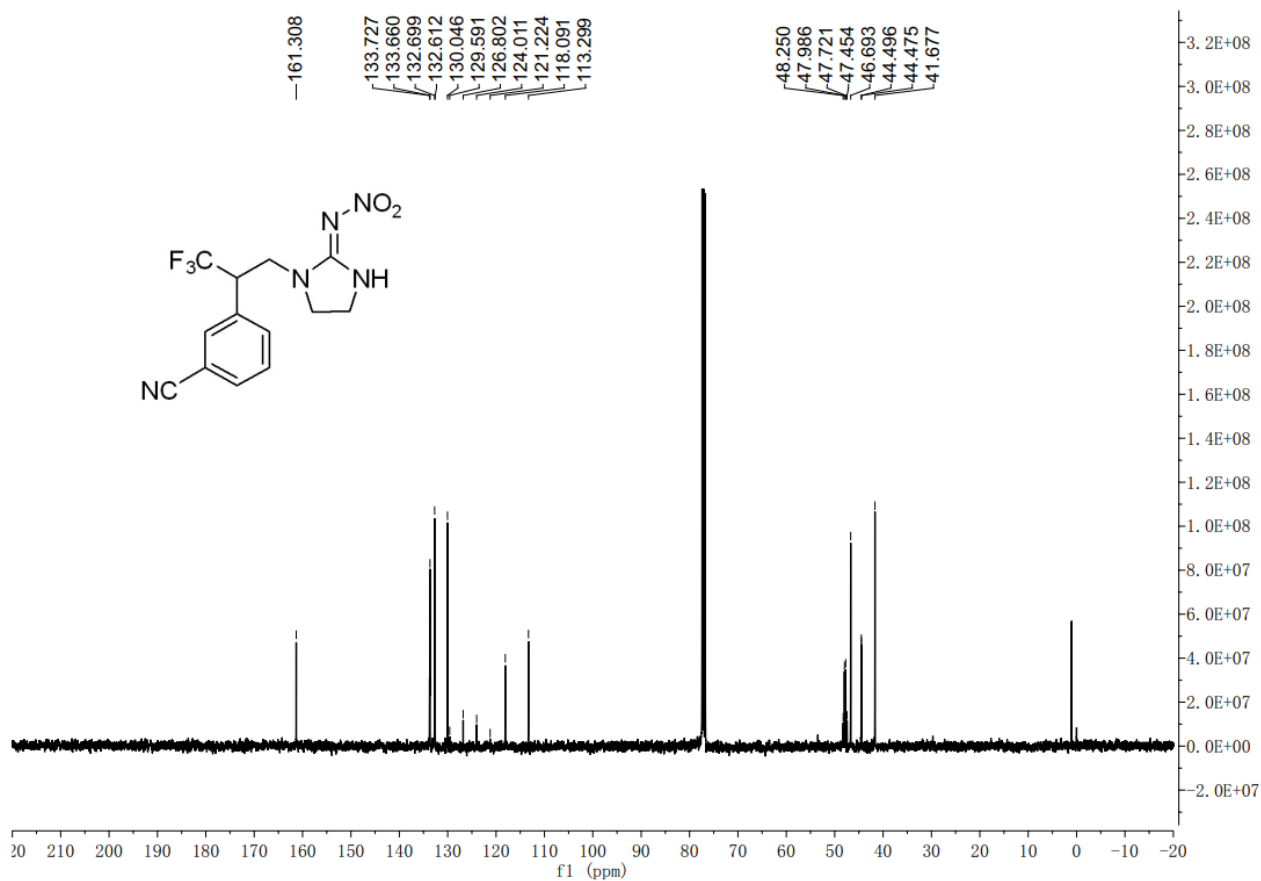

**$^{19}\text{F}$  NMR spectrum of 3ja (564 MHz,  $\text{CDCl}_3$ )**

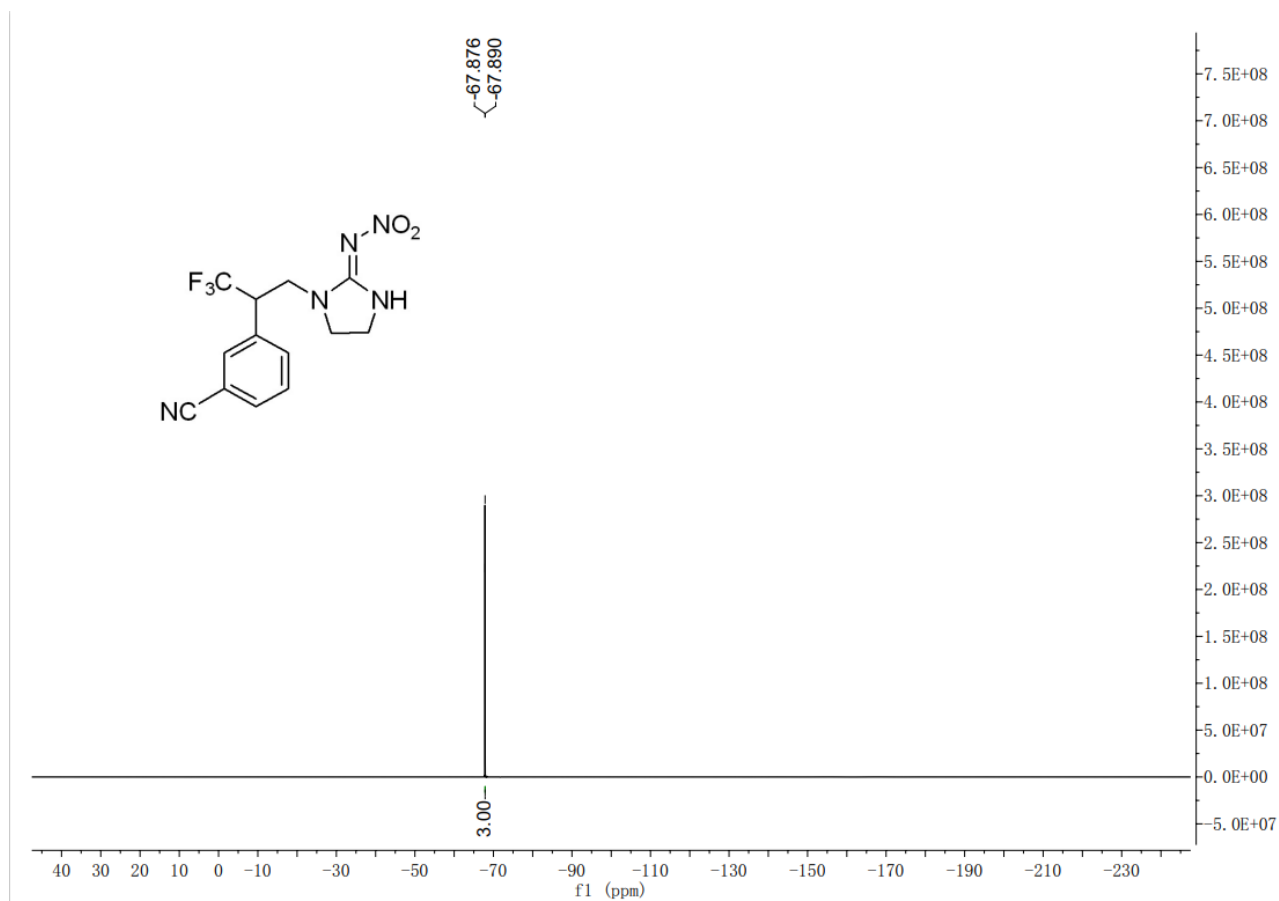

**HRMS (EI) spectrum of 3ja**

20221599 419 (6.987) Cm (419-(46+716))

TOF MS EI+  
1.38e4

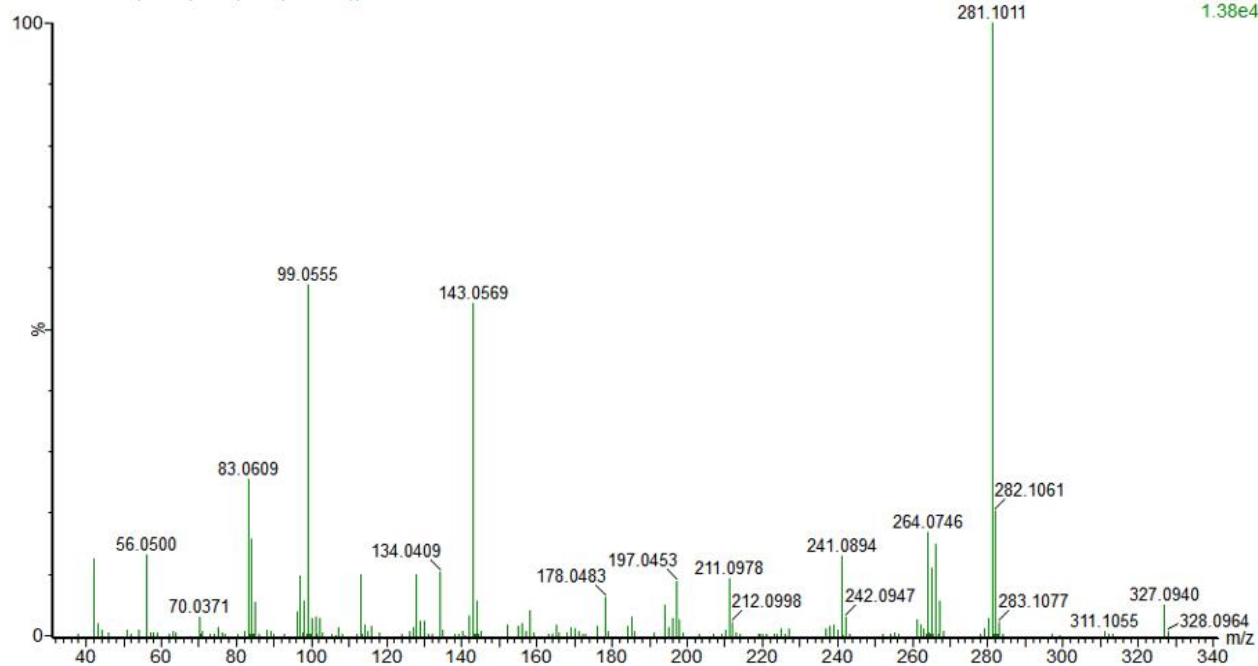

**<sup>1</sup>H NMR spectrum of 3ka (400 MHz, CDCl<sub>3</sub>)**

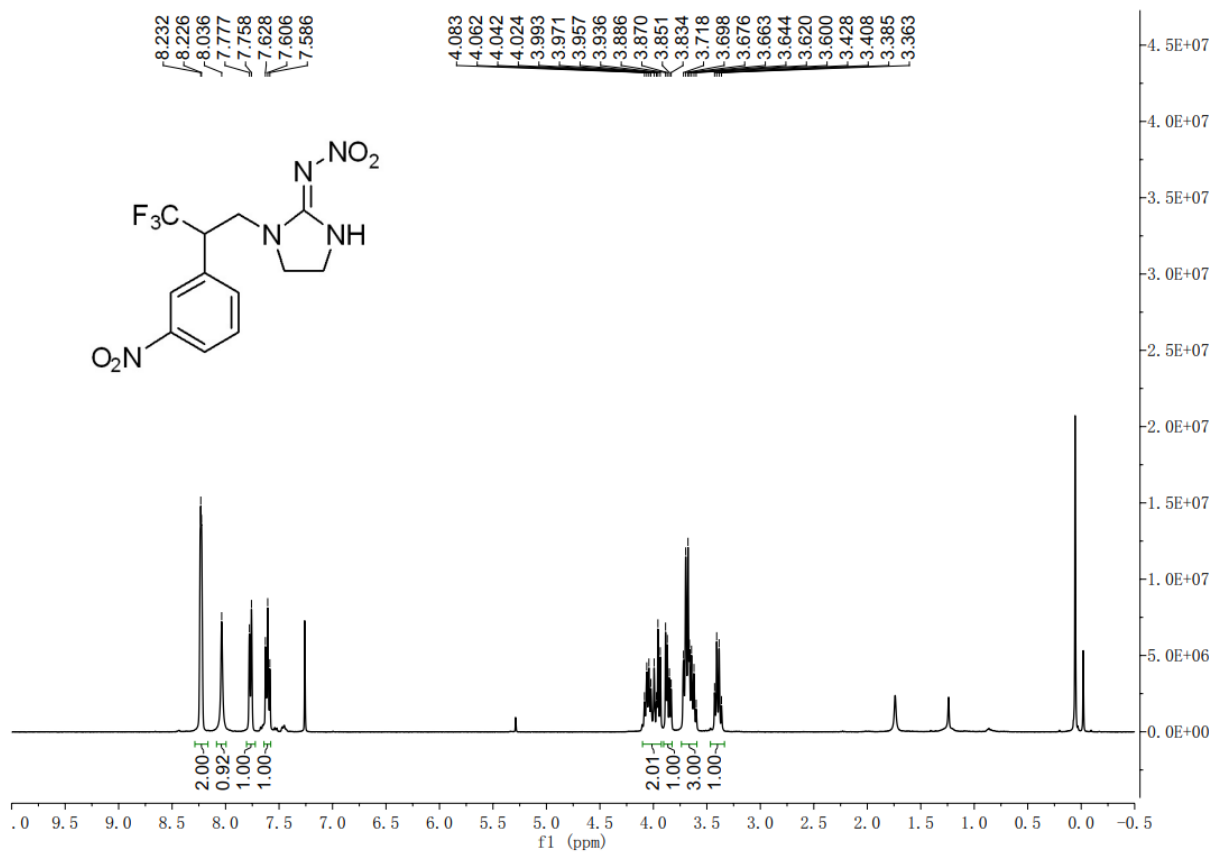

**<sup>13</sup>C NMR spectrum of 3ka (100 MHz, CDCl<sub>3</sub>)**

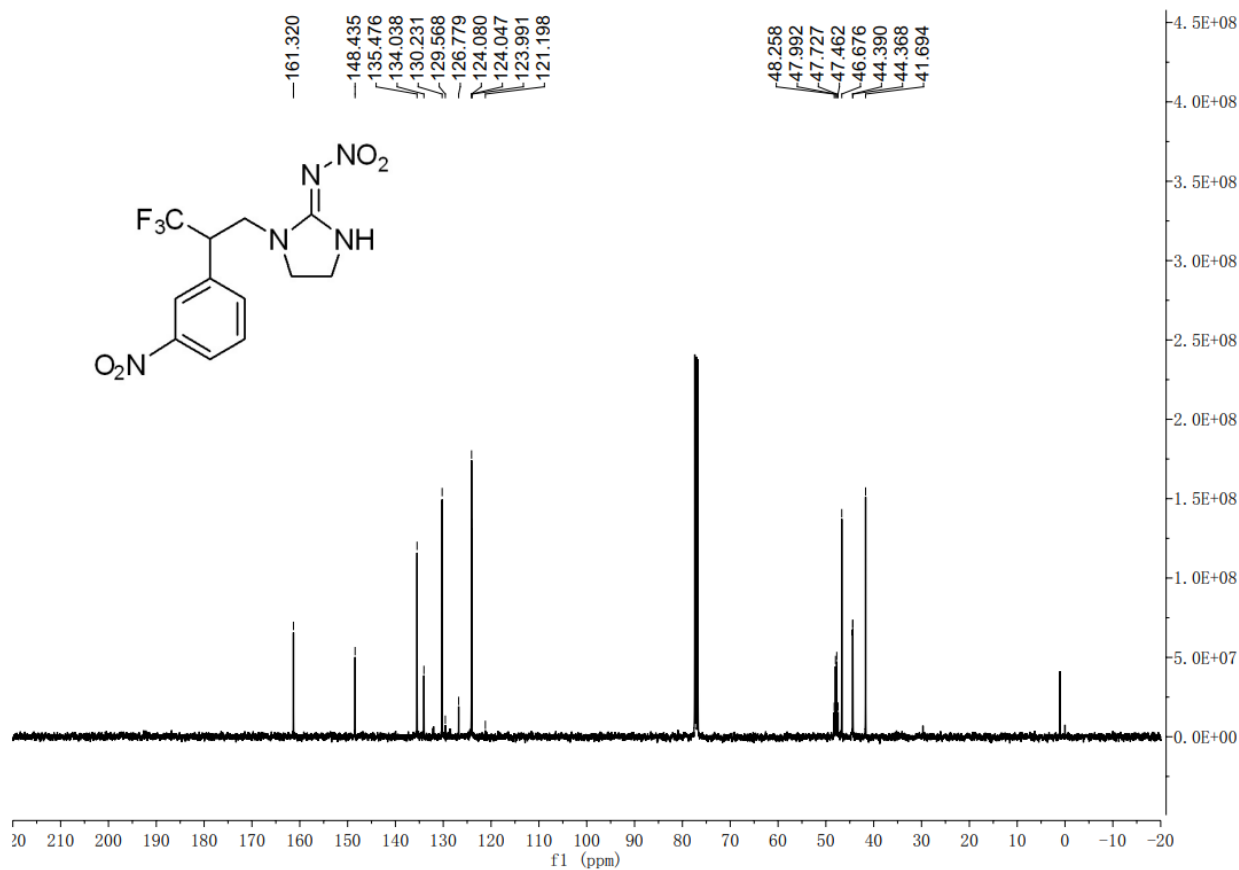

**<sup>19</sup>F NMR spectrum of 3ka (564 MHz, CDCl<sub>3</sub>)**

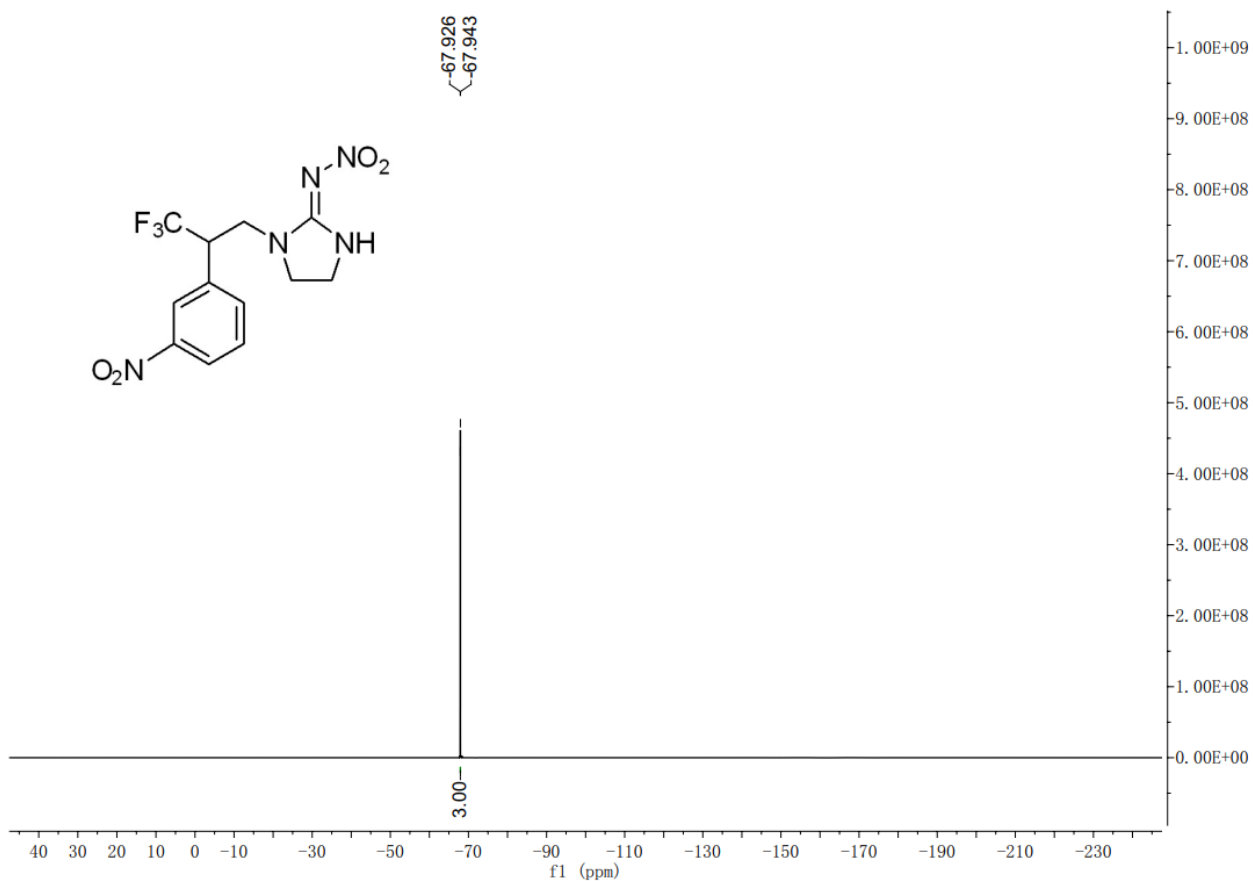

**HRMS (EI) spectrum of 3ka**

20221714 462 (7.705) Cm (462-(75+877))

TOF MS EI+  
1.92e4

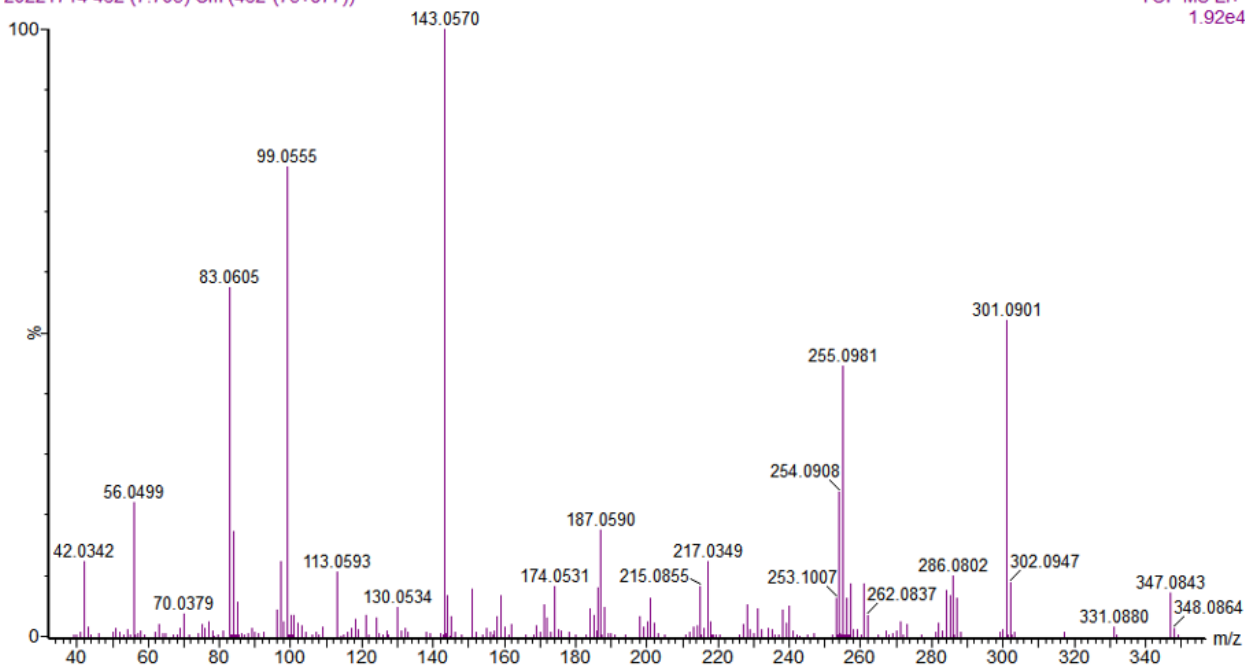

**<sup>1</sup>H NMR spectrum of 3la (400 MHz, CDCl<sub>3</sub>)**

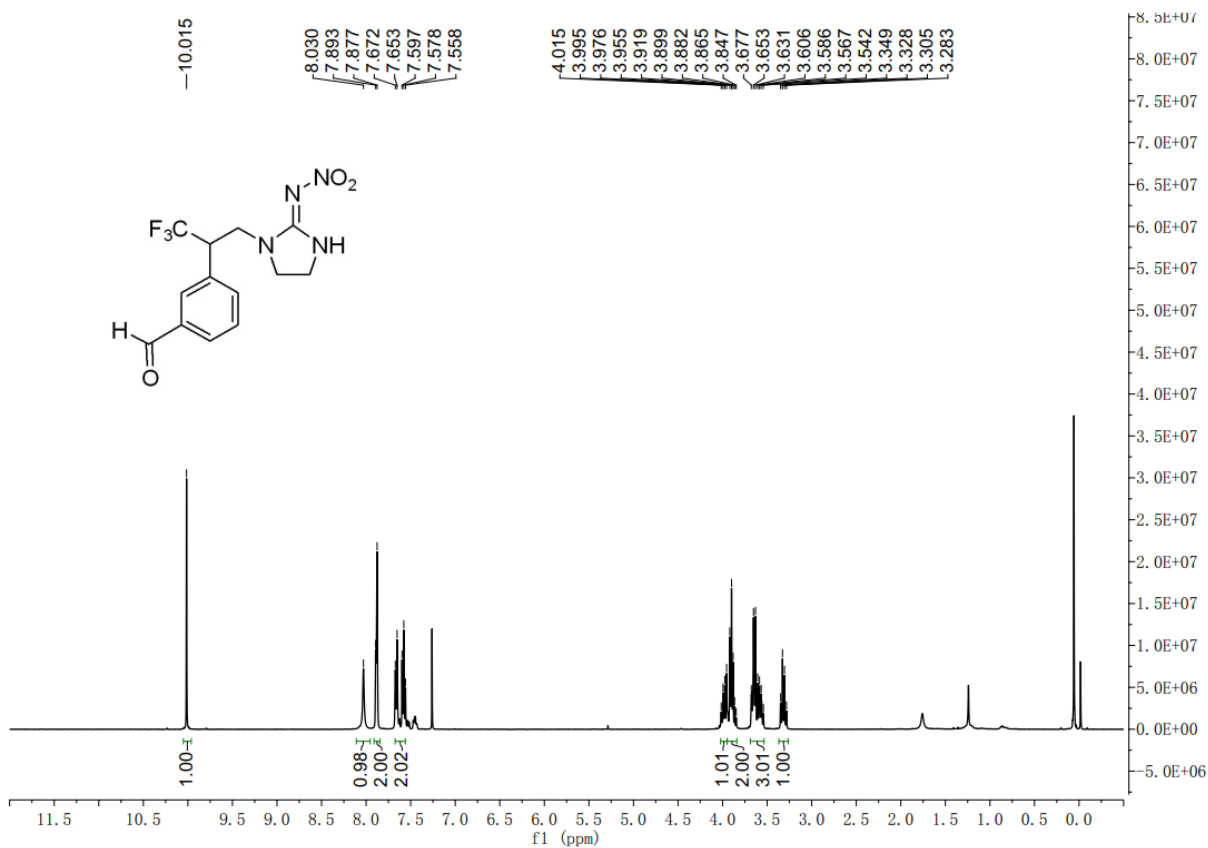

**<sup>13</sup>C NMR spectrum of 3la (100 MHz, CDCl<sub>3</sub>)**

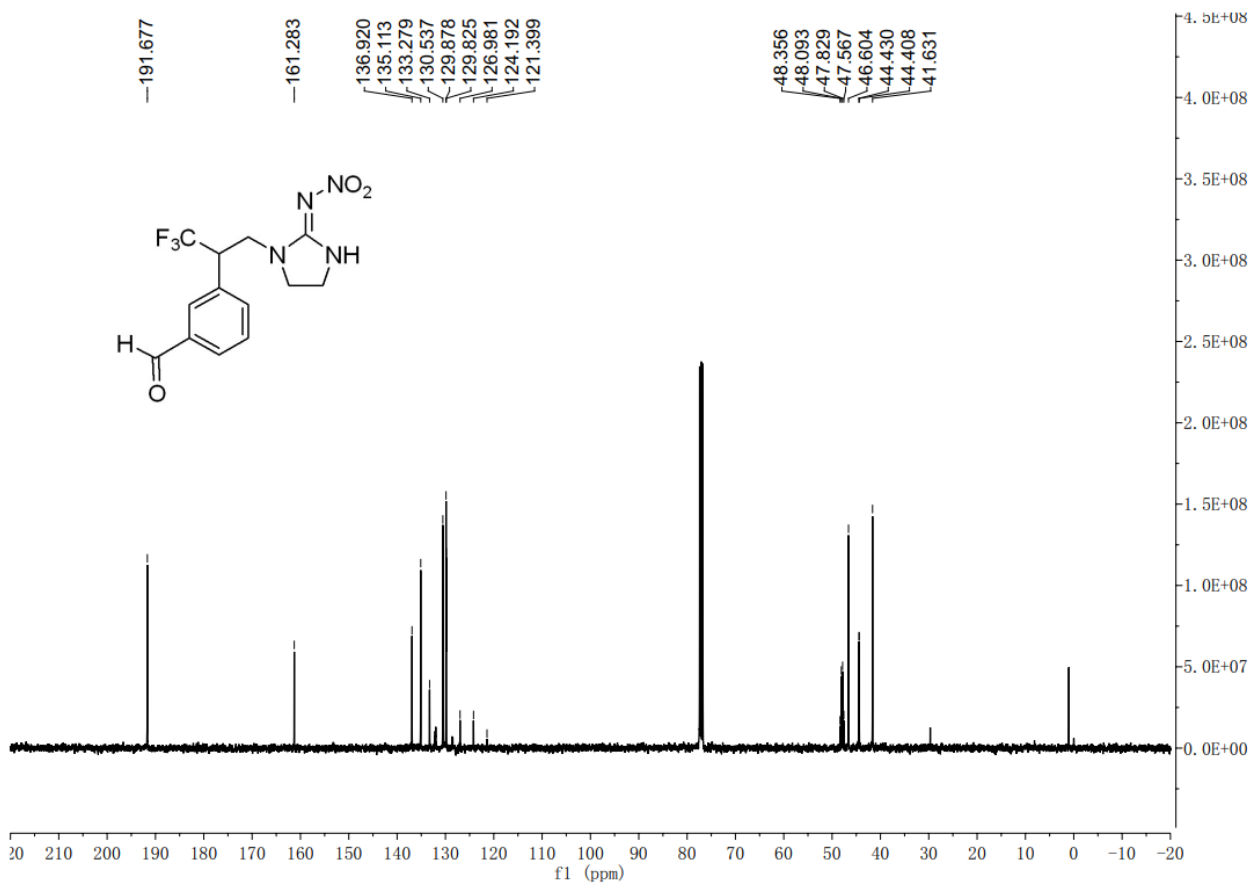



**$^{19}\text{F}$  NMR spectrum of 3la (564 MHz,  $\text{CDCl}_3$ )**

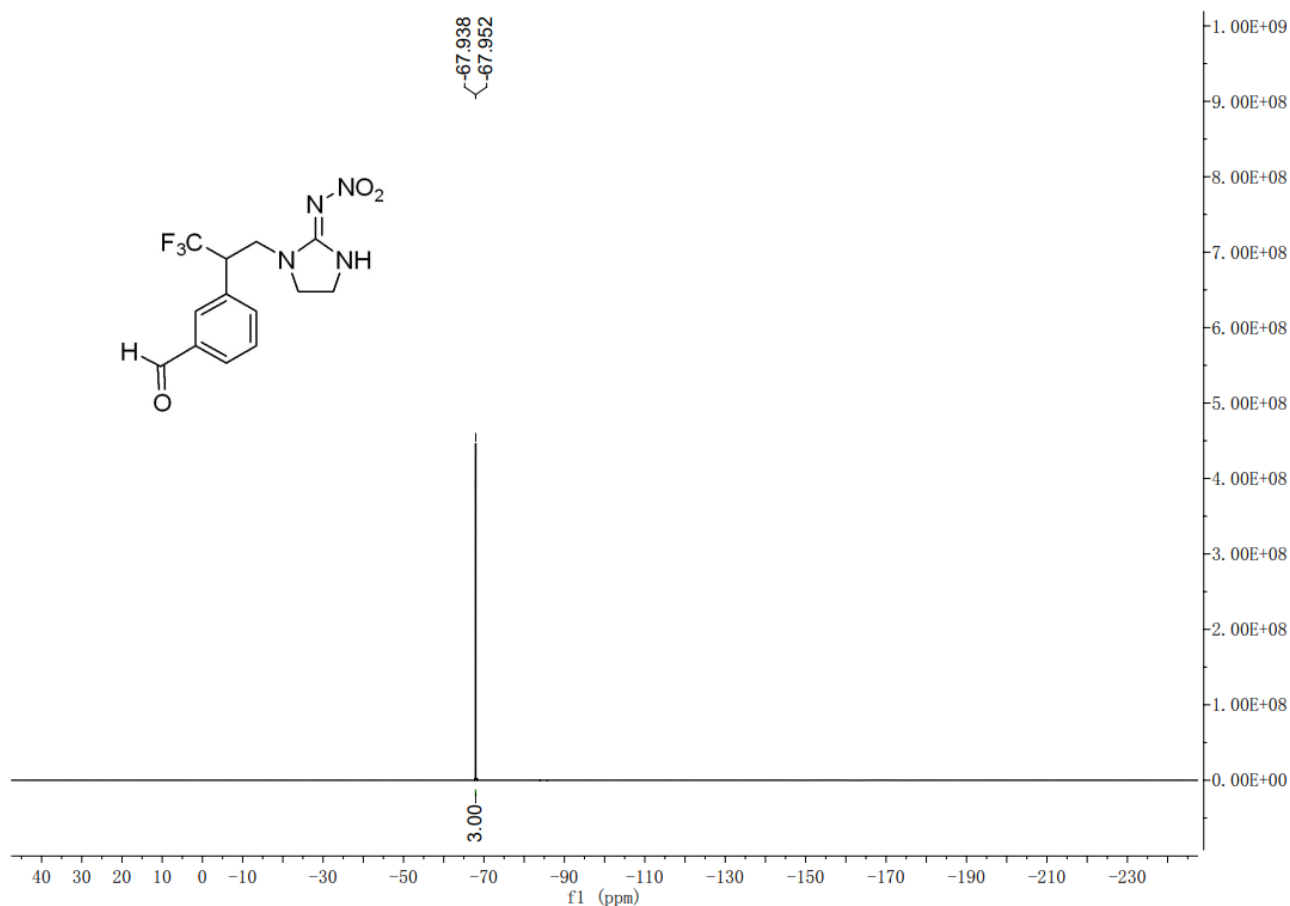

**HRMS (EI) spectrum of 3la**

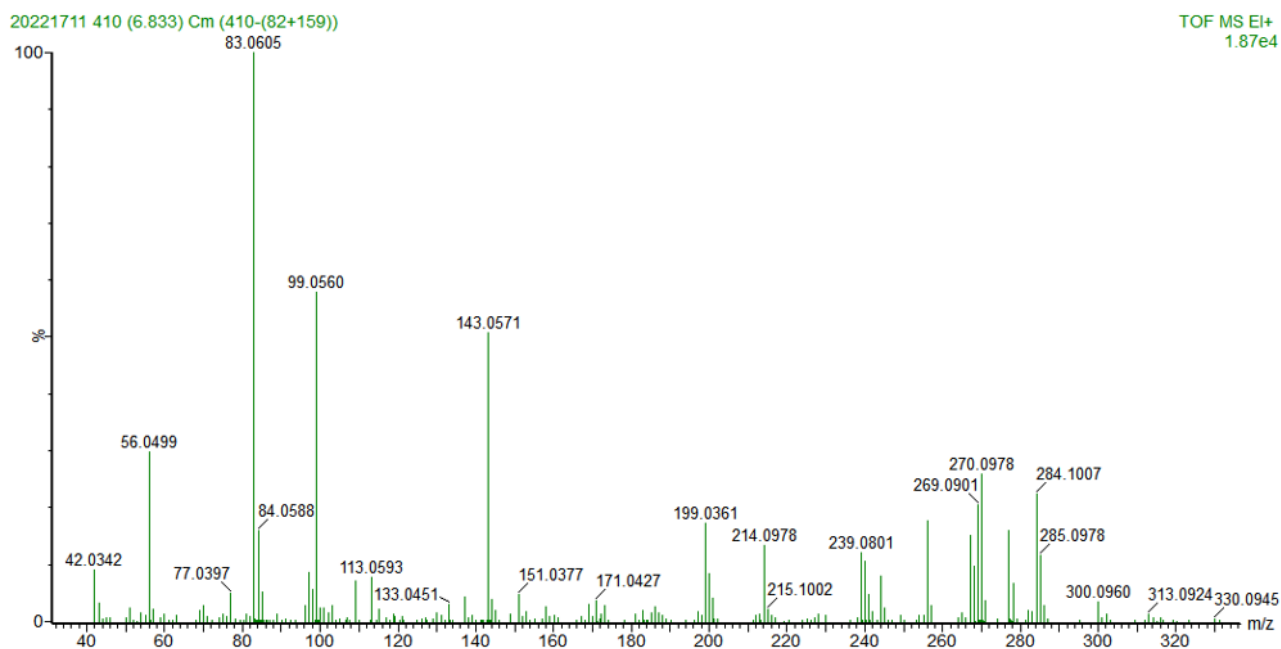

**<sup>1</sup>H NMR spectrum of 3ma (400 MHz, CDCl<sub>3</sub>)**

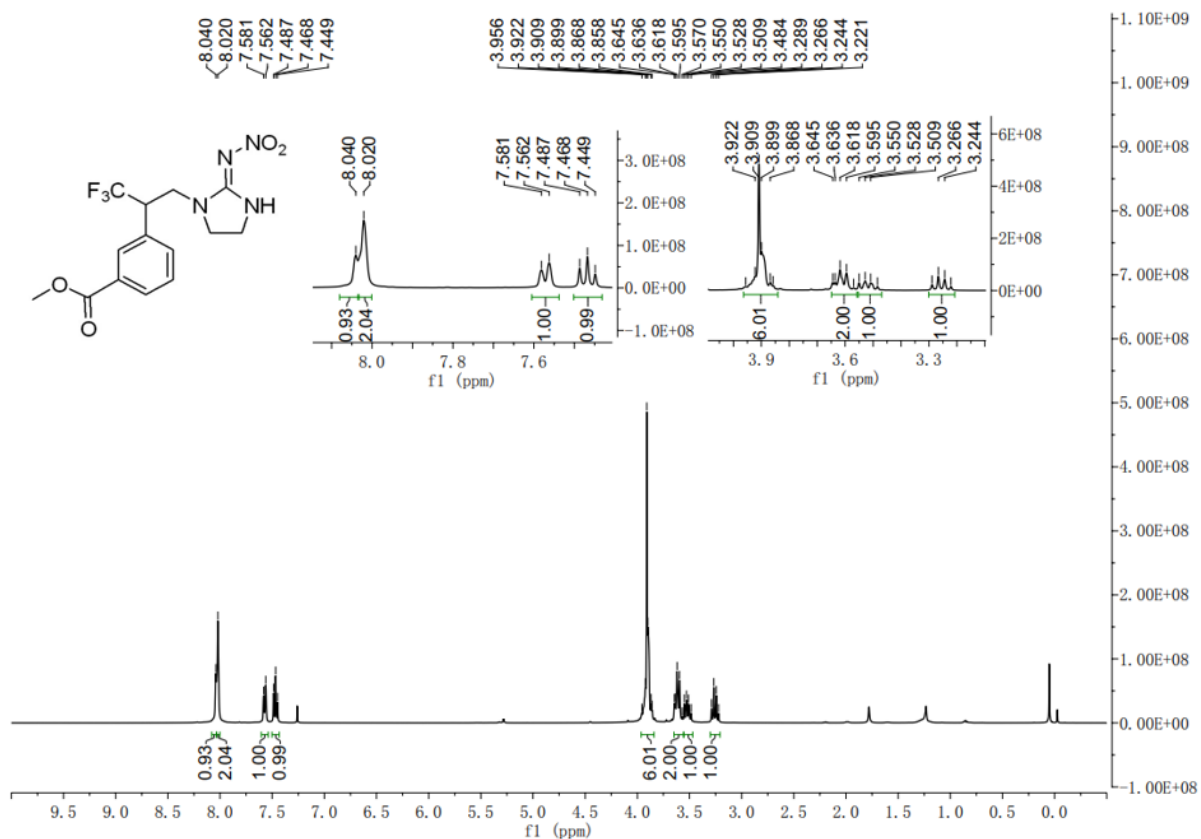

**<sup>13</sup>C NMR spectrum of 3ma (100 MHz, CDCl<sub>3</sub>)**

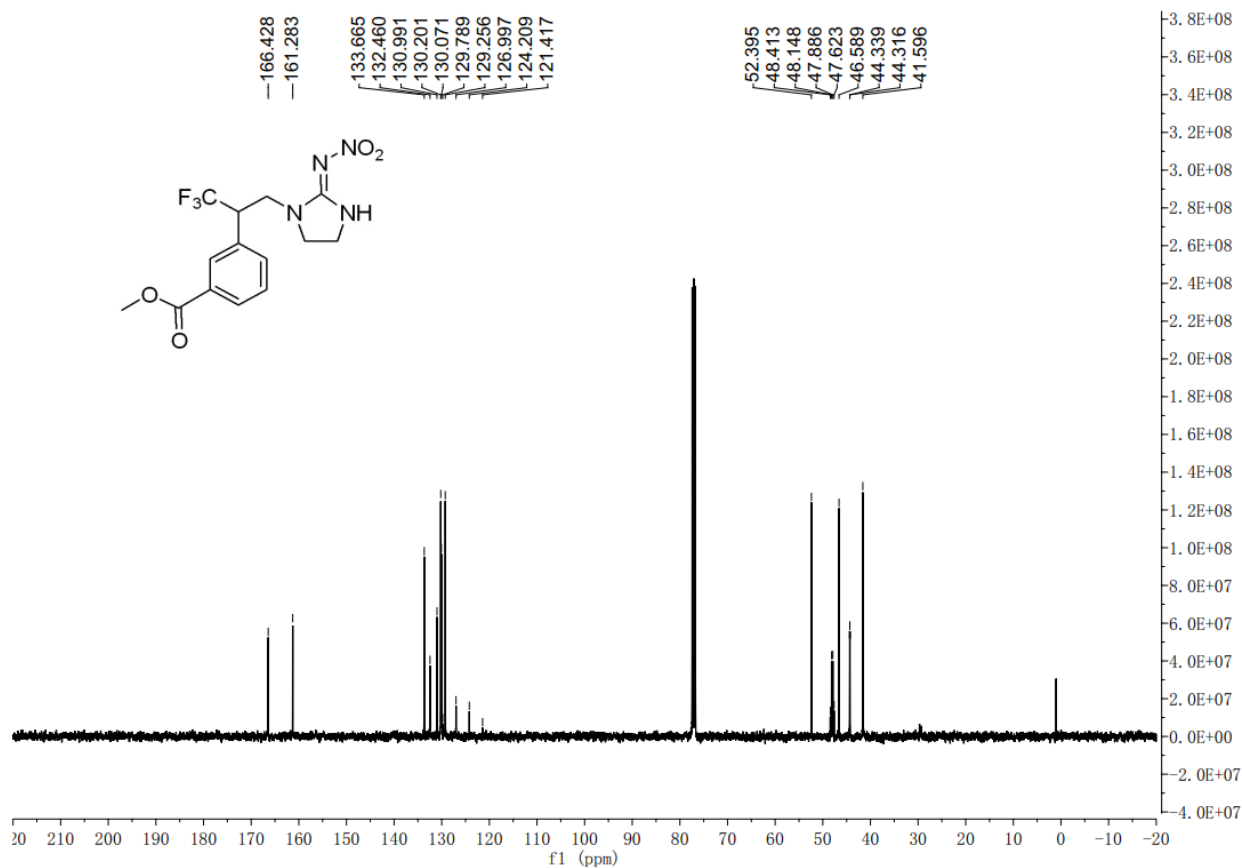

**<sup>19</sup>F NMR spectrum of 3ma (564 MHz, CDCl<sub>3</sub>)**

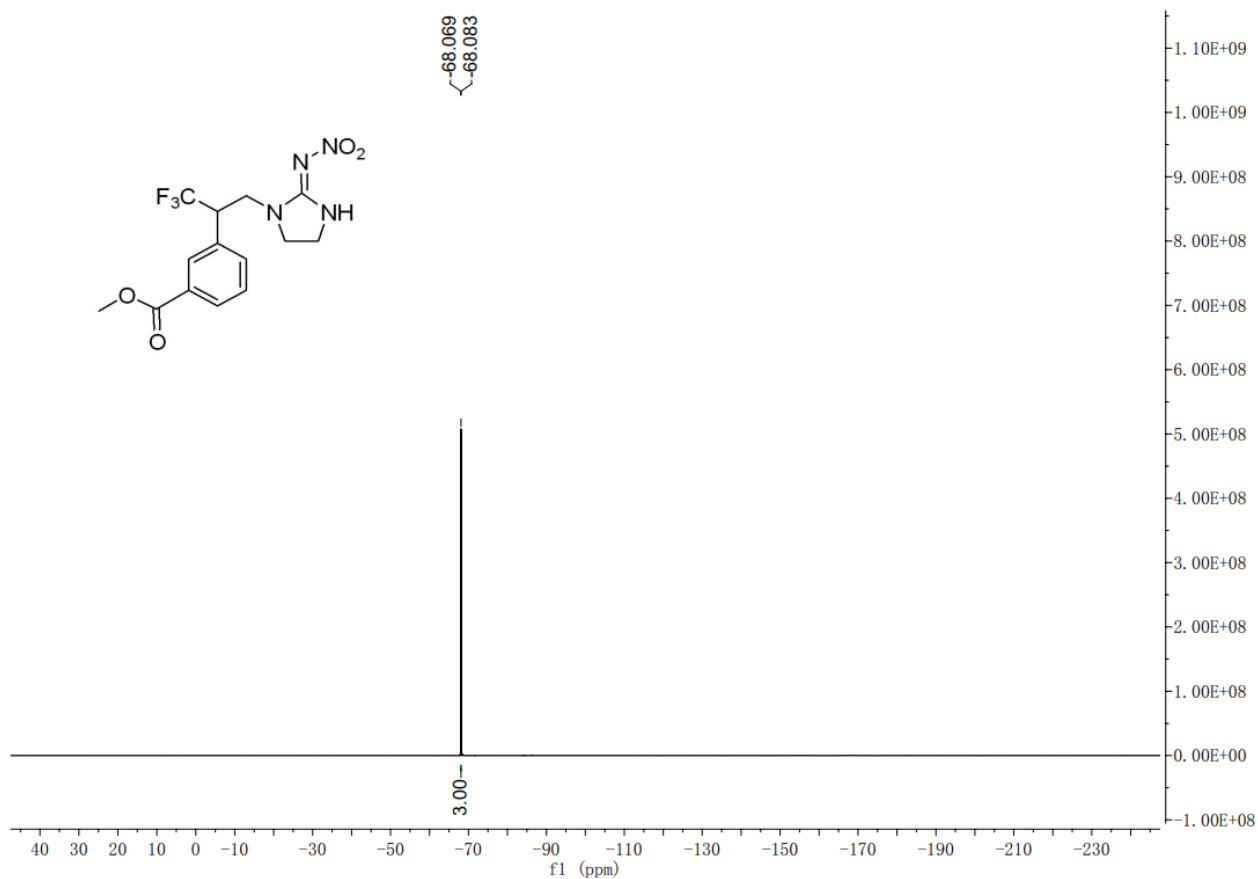

**HRMS (EI) spectrum of 3ma**

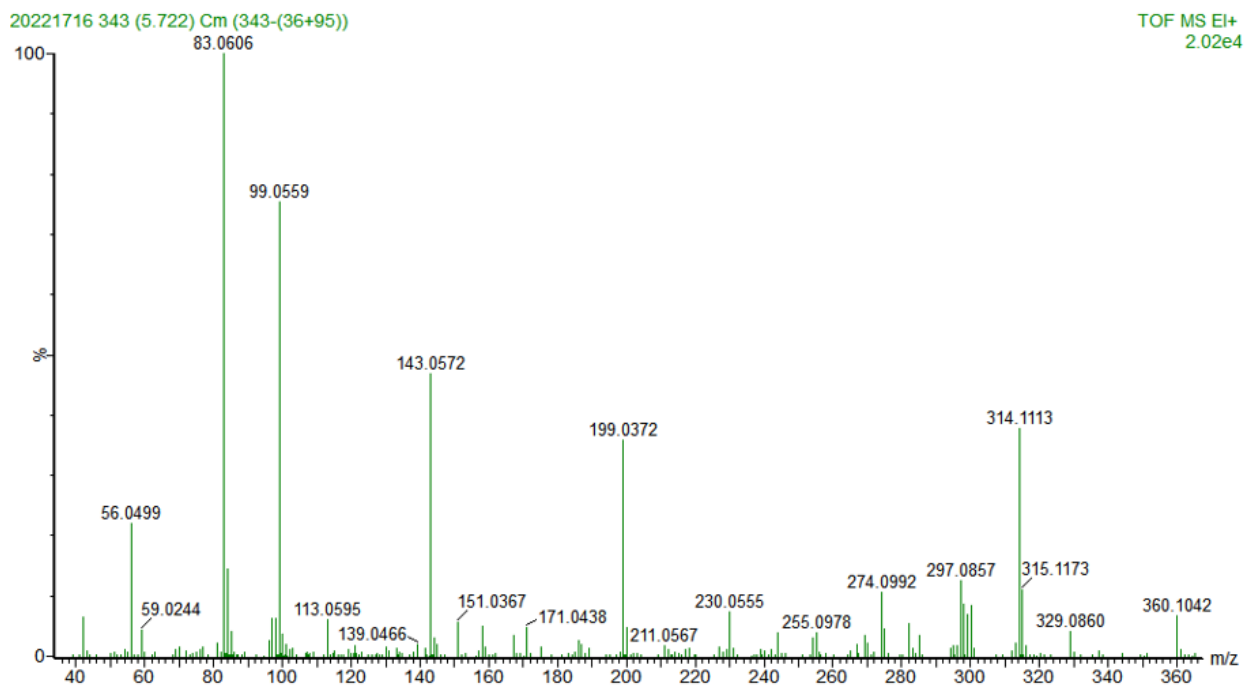

**<sup>1</sup>H NMR spectrum of 3na (400 MHz, CDCl<sub>3</sub>)**

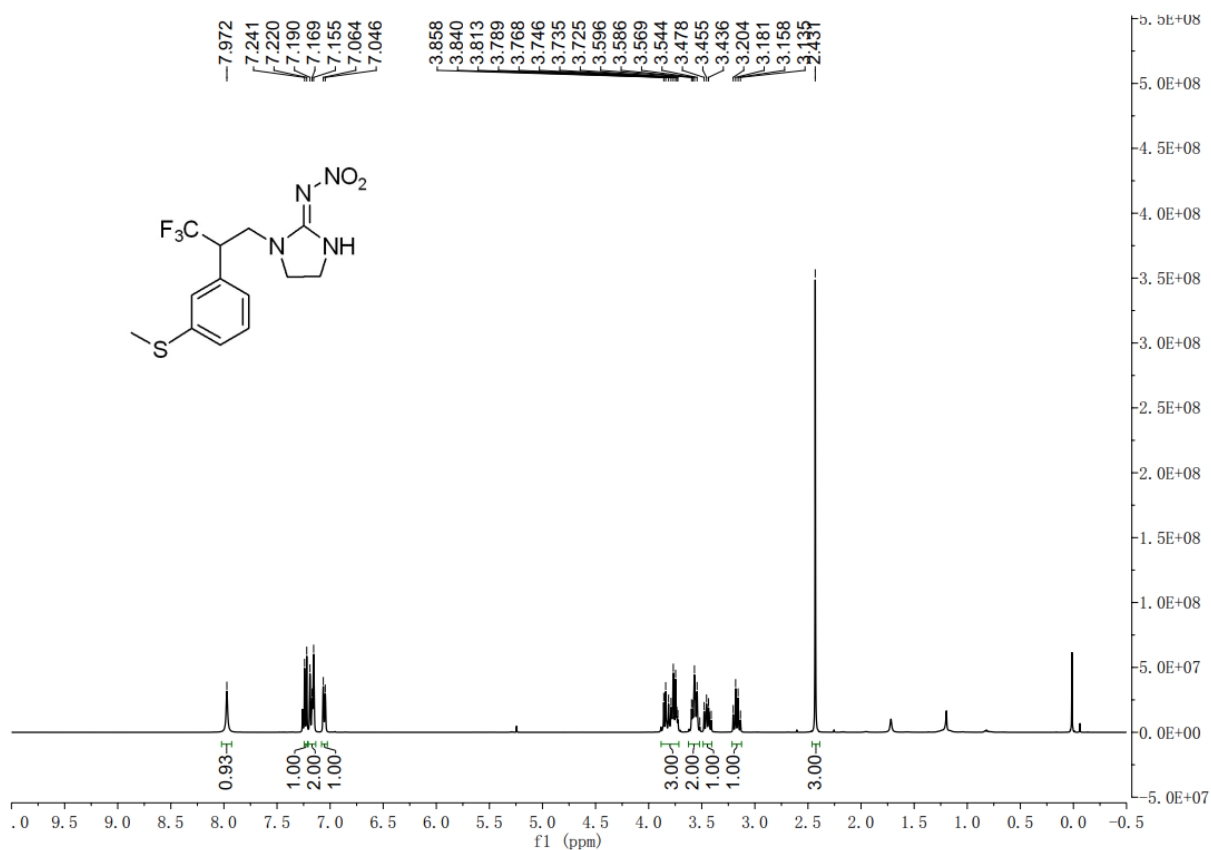

**<sup>13</sup>C NMR spectrum of 3na (100 MHz, CDCl<sub>3</sub>)**

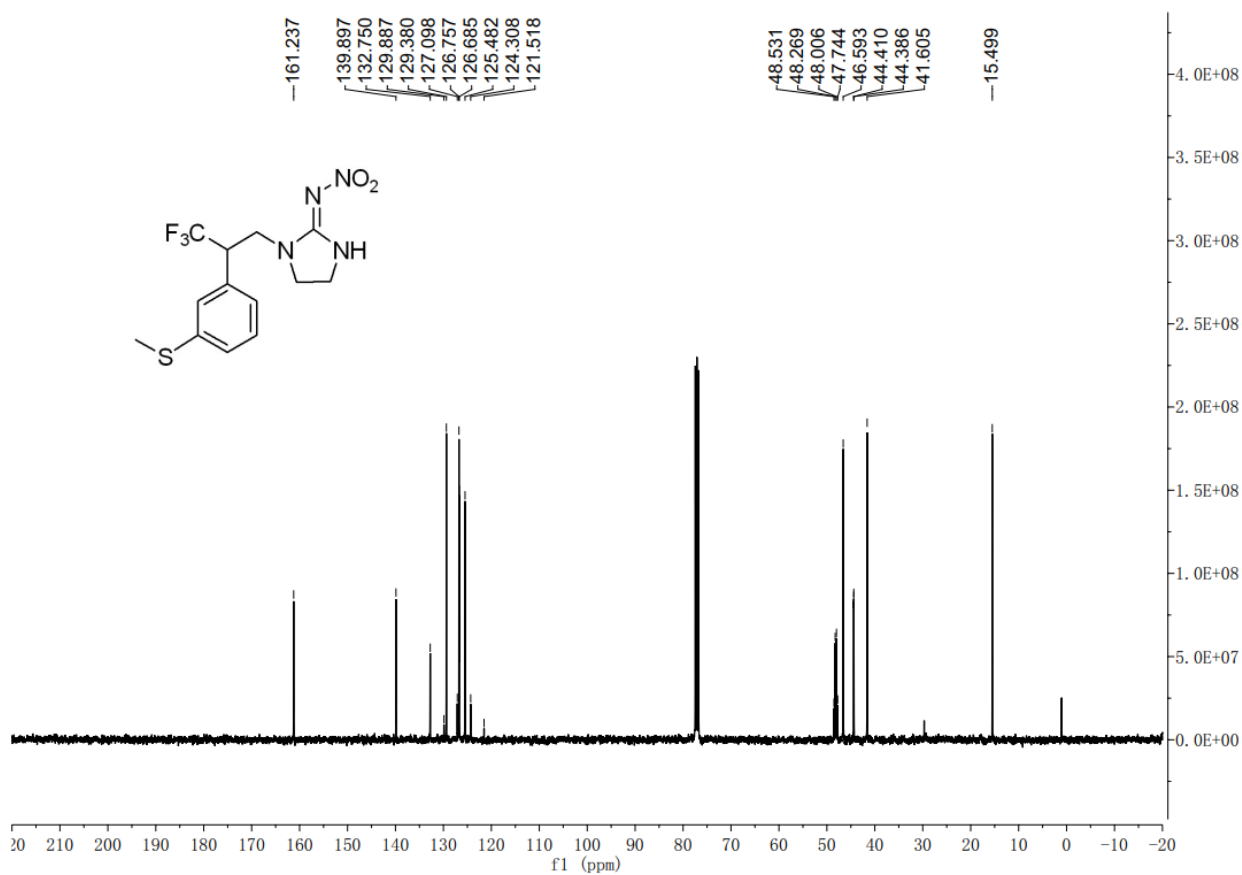

**$^{19}\text{F}$  NMR spectrum of 3na (564 MHz,  $\text{CDCl}_3$ )**

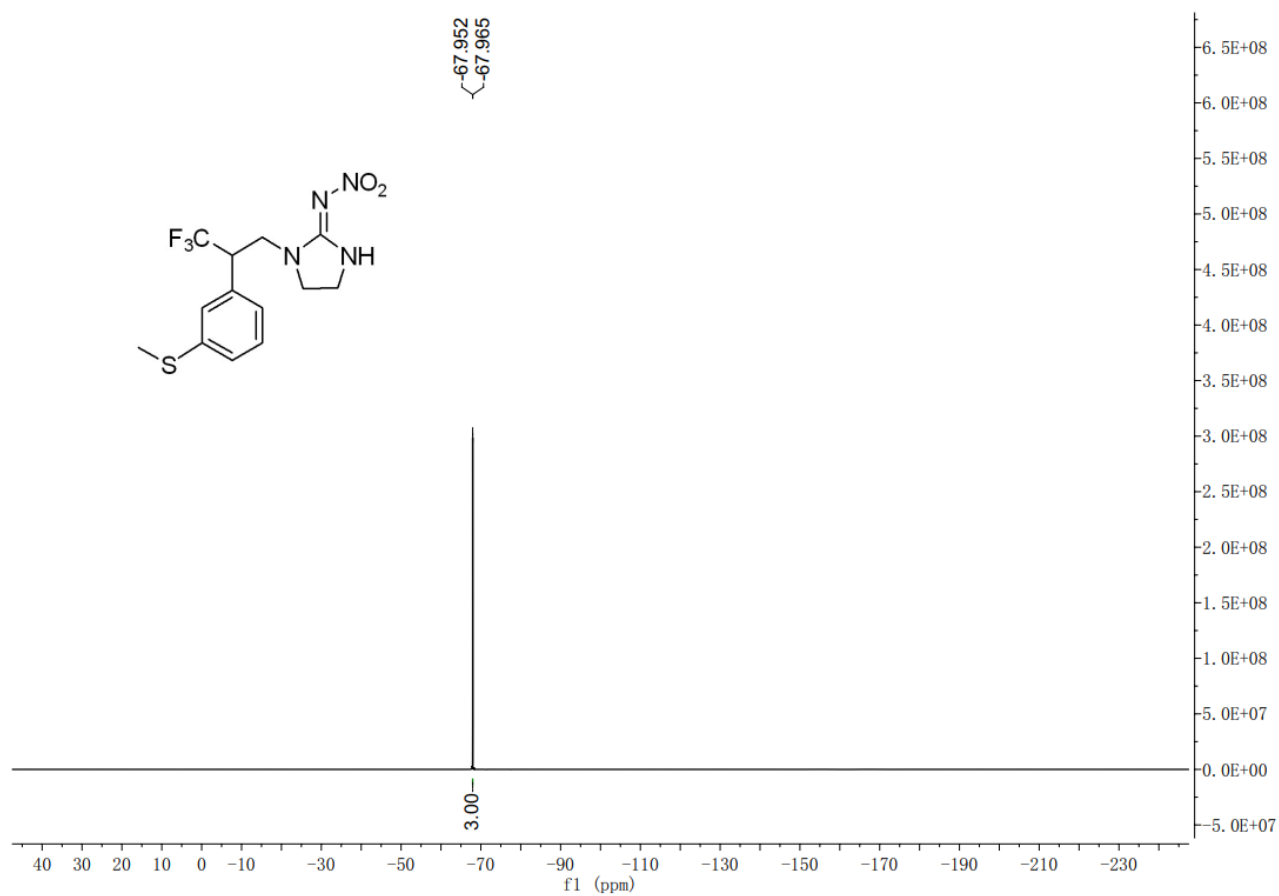

**HRMS (EI) spectrum of 3na**

20221721 548 (9.133) Cm (548-(20+52))

TOF MS EI+  
2.23e4

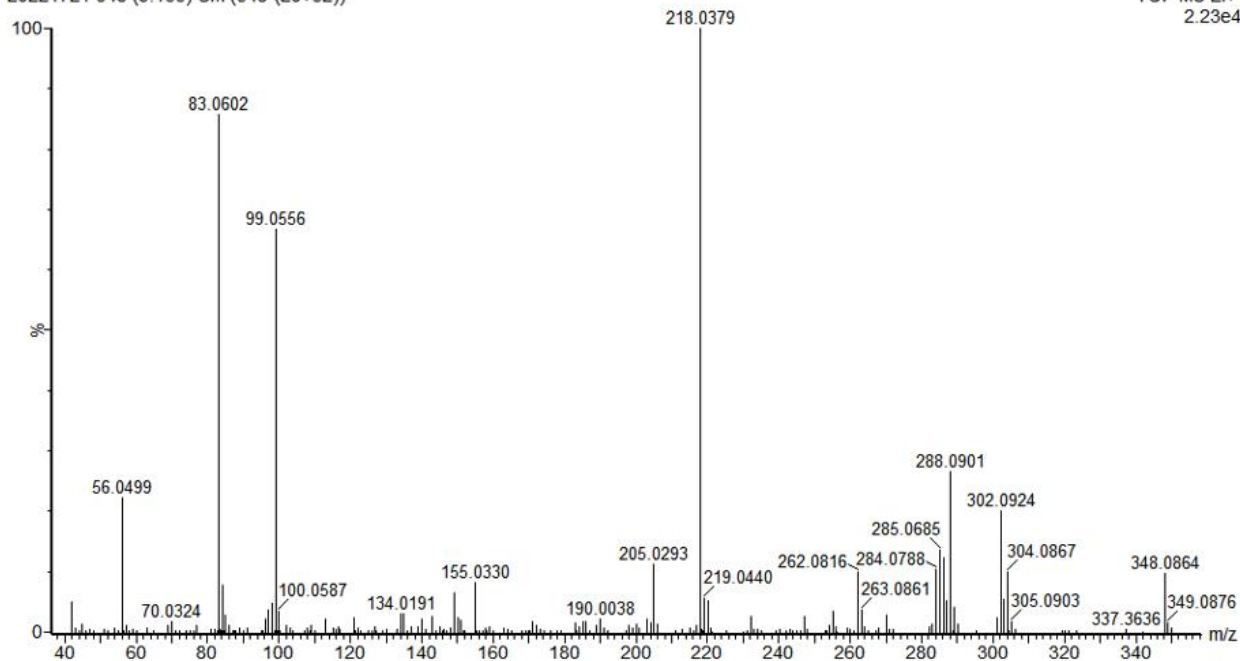

**<sup>1</sup>H NMR spectrum of 3qa (400 MHz, CDCl<sub>3</sub>)**

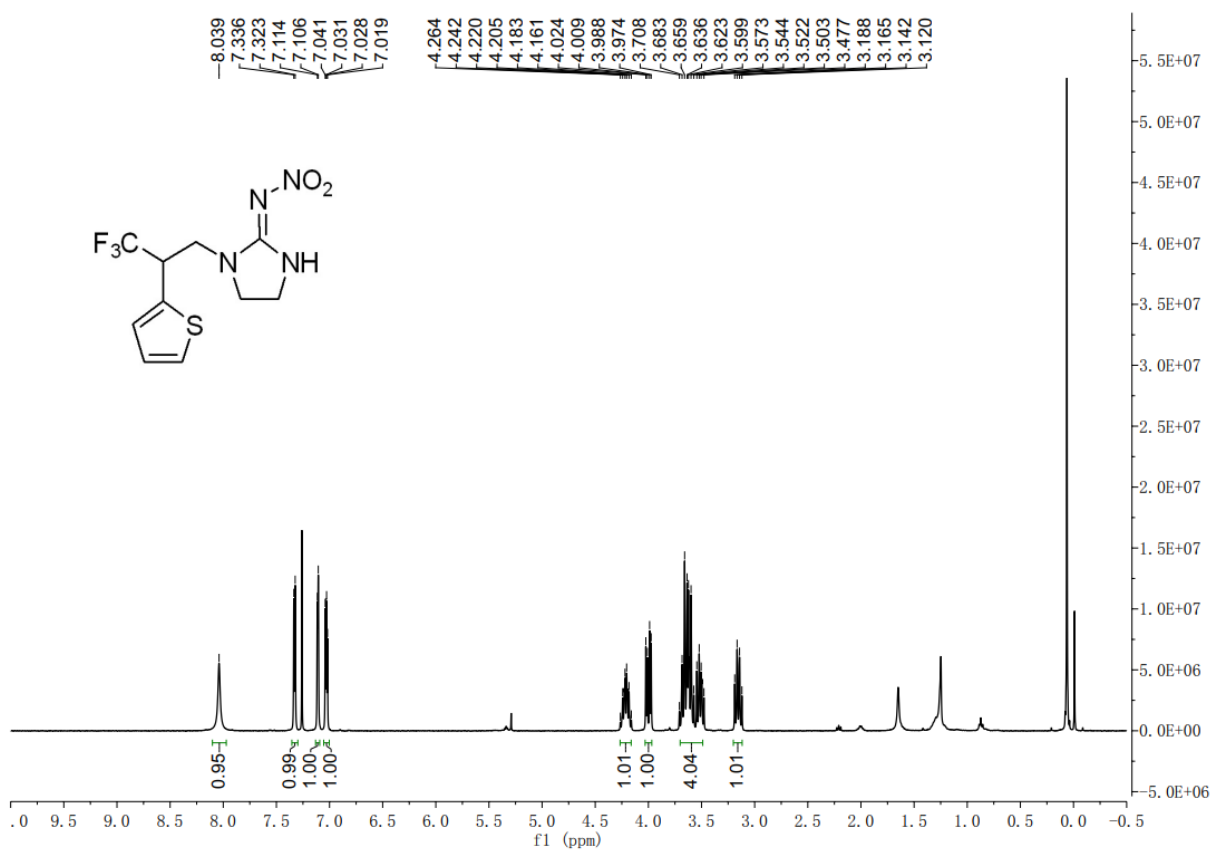

**<sup>13</sup>C NMR spectrum of 3qa (100 MHz, CDCl<sub>3</sub>)**

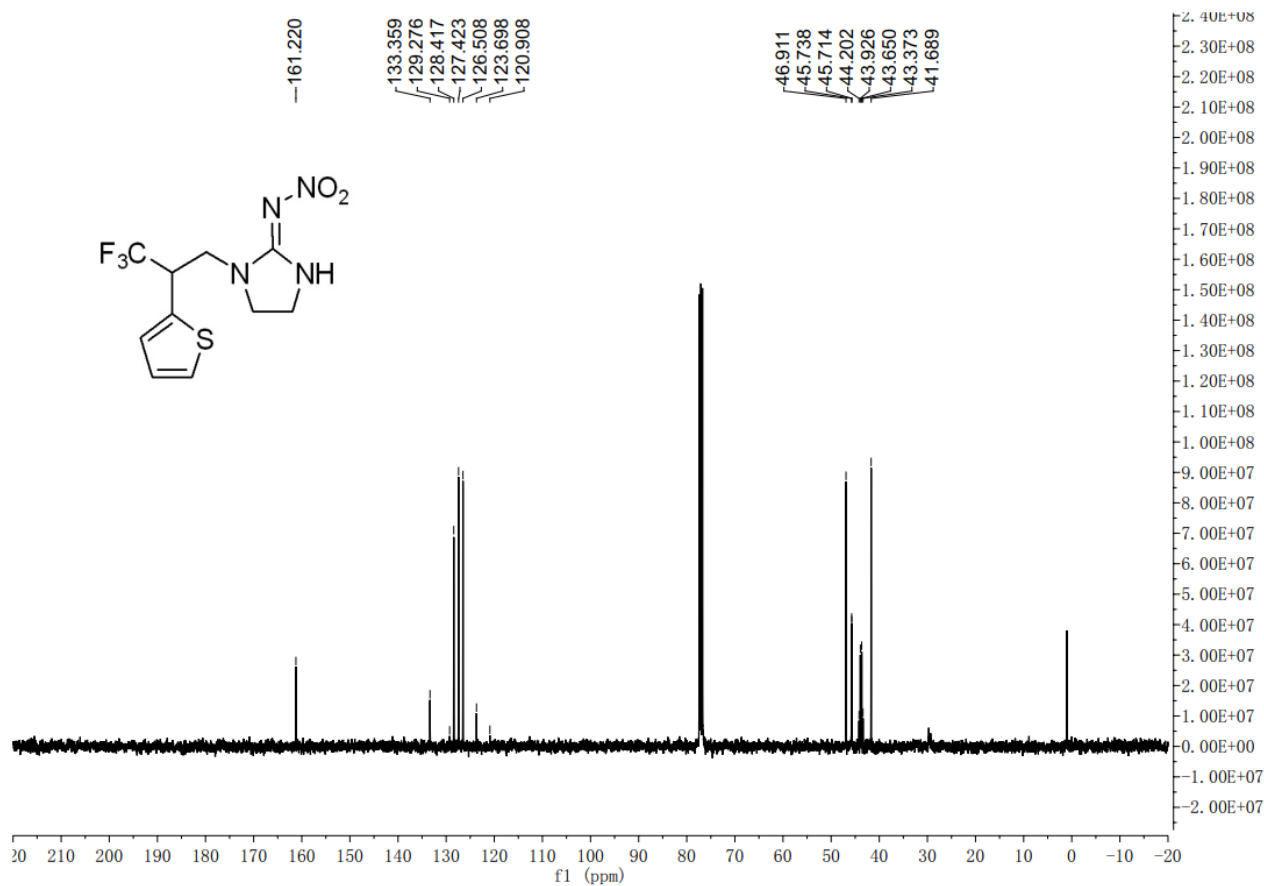

**<sup>19</sup>F NMR spectrum of 3qa (564 MHz, CDCl<sub>3</sub>)**

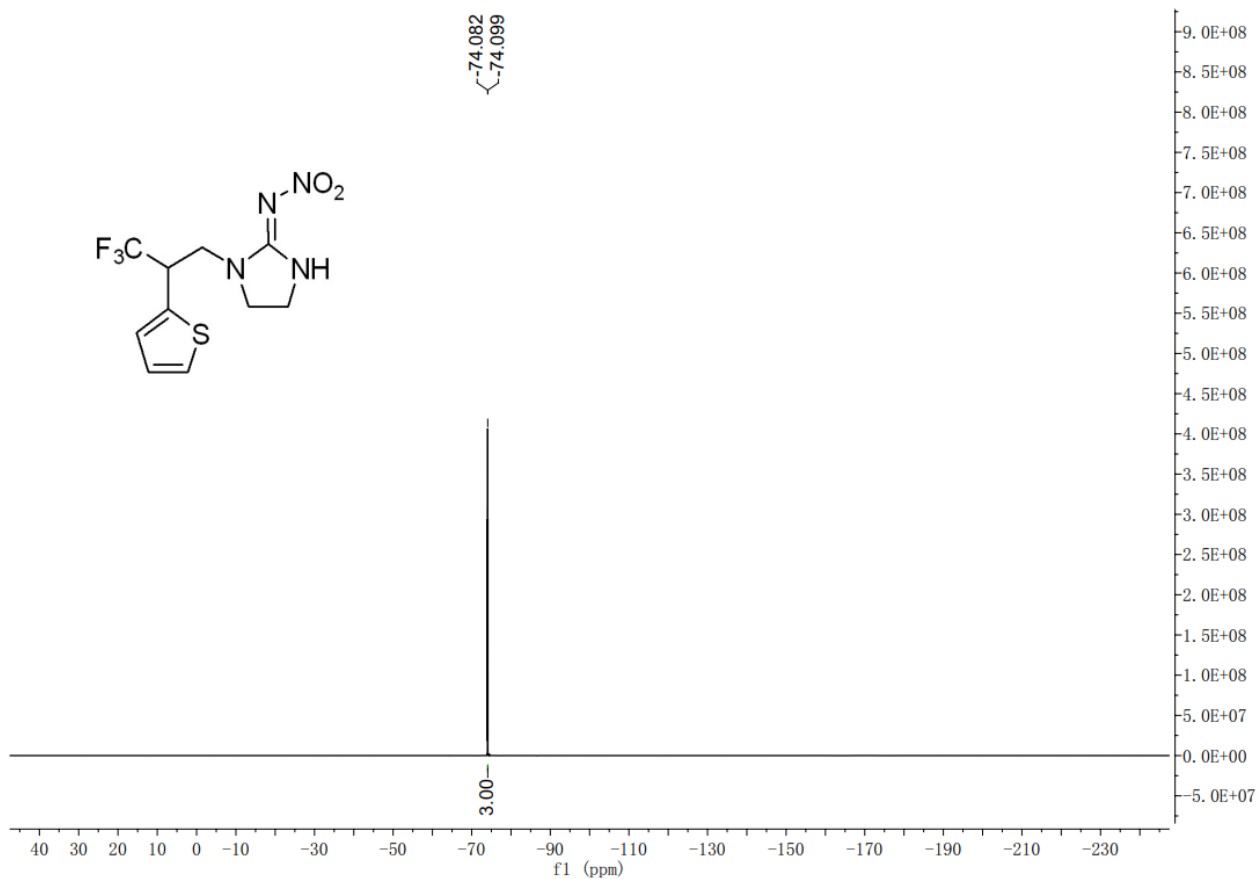

**HRMS (EI) spectrum of 3qa**

20221709 496 (8.273) Cm (496-(42+91))

TOF MS EI+  
1.62e4

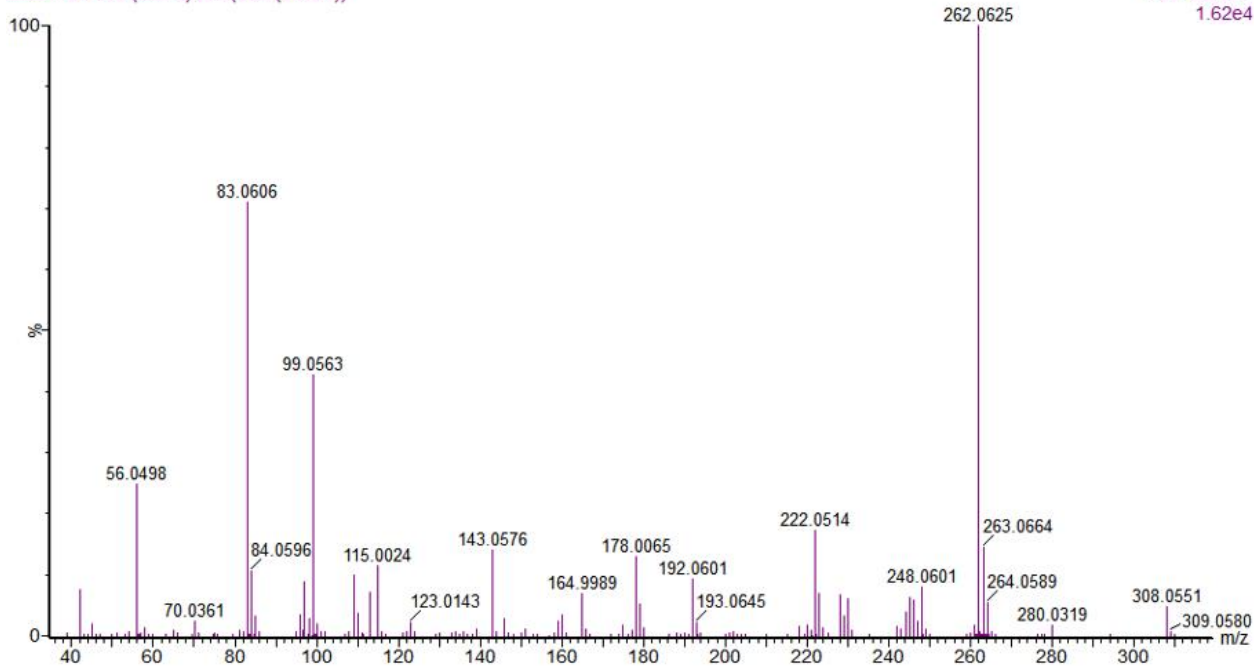

**<sup>1</sup>H NMR spectrum of 3ra (400 MHz, CDCl<sub>3</sub>)**

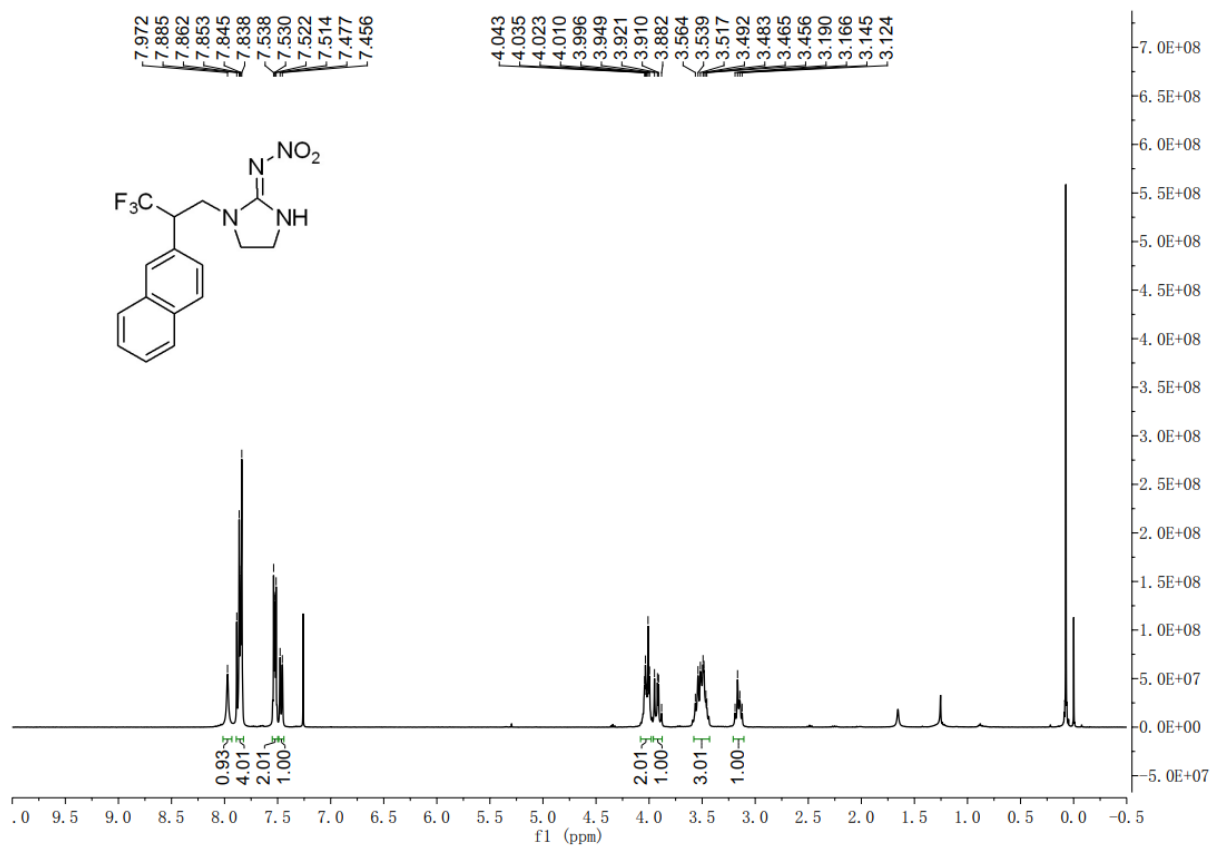

**<sup>13</sup>C NMR spectrum of 3ra (100 MHz, CDCl<sub>3</sub>)**

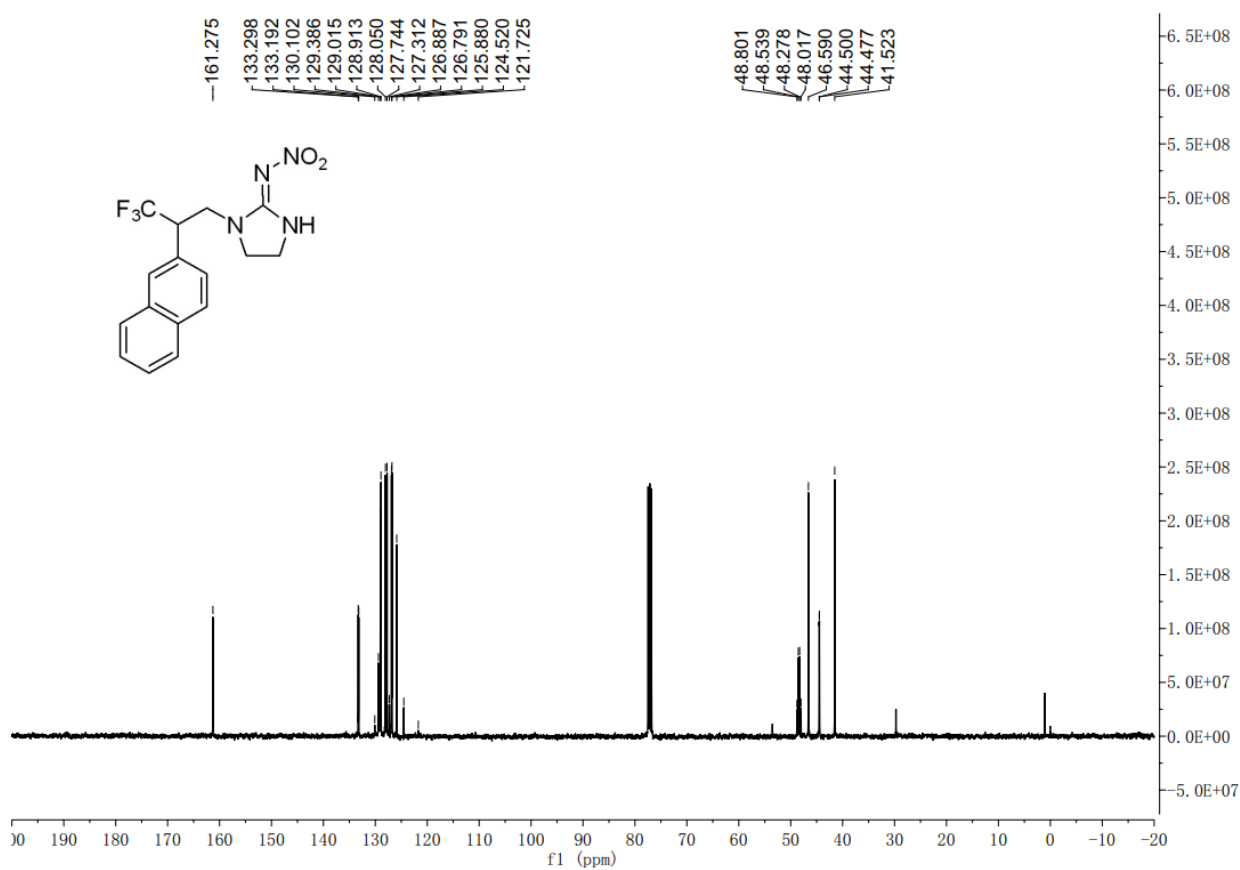



**$^{19}\text{F}$  NMR spectrum of 3ra (564 MHz,  $\text{CDCl}_3$ )**

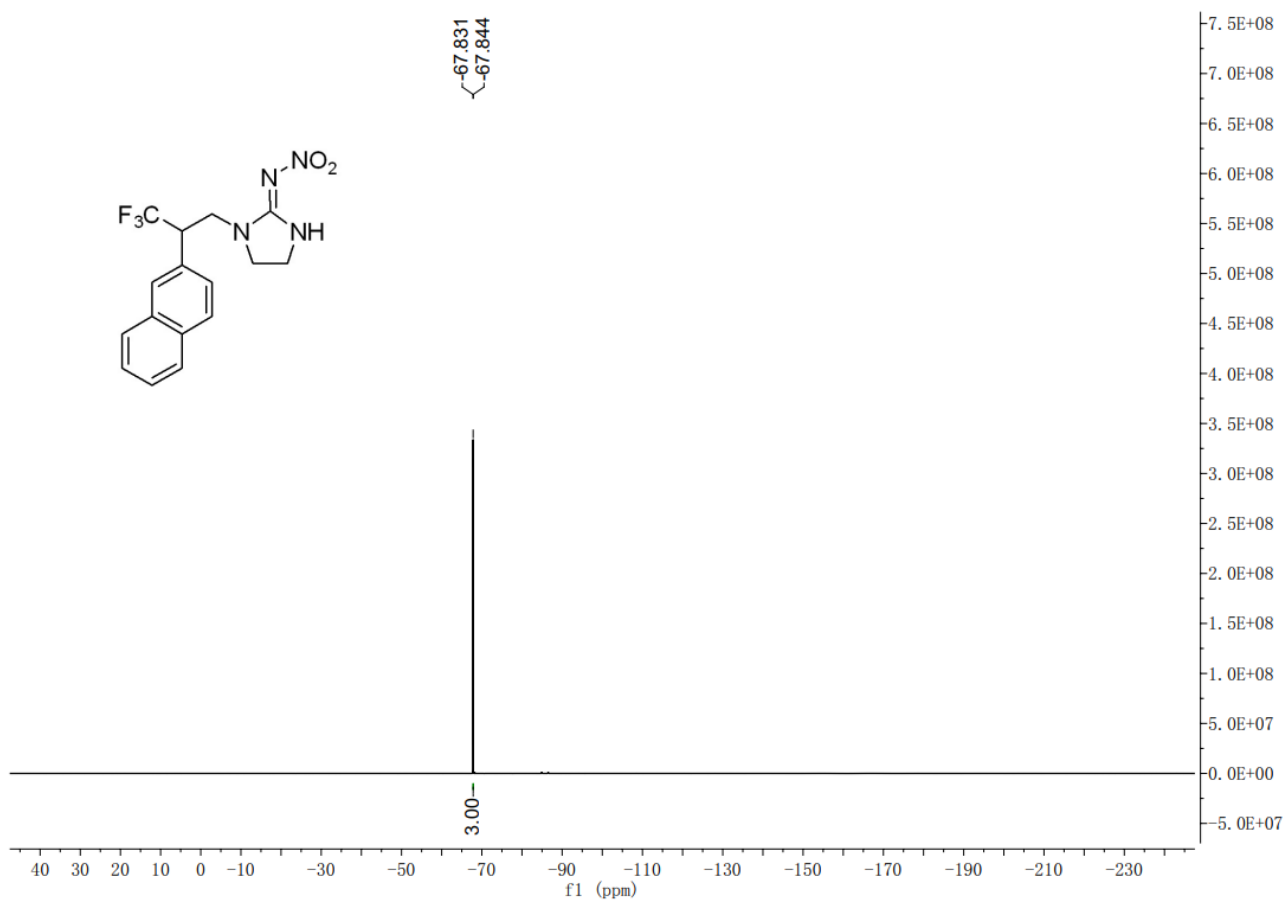

**HRMS (EI) spectrum of 3ra**

20221712 370 (6.167) Cm (370-(30+52))

TOF MS EI+  
1.52e4

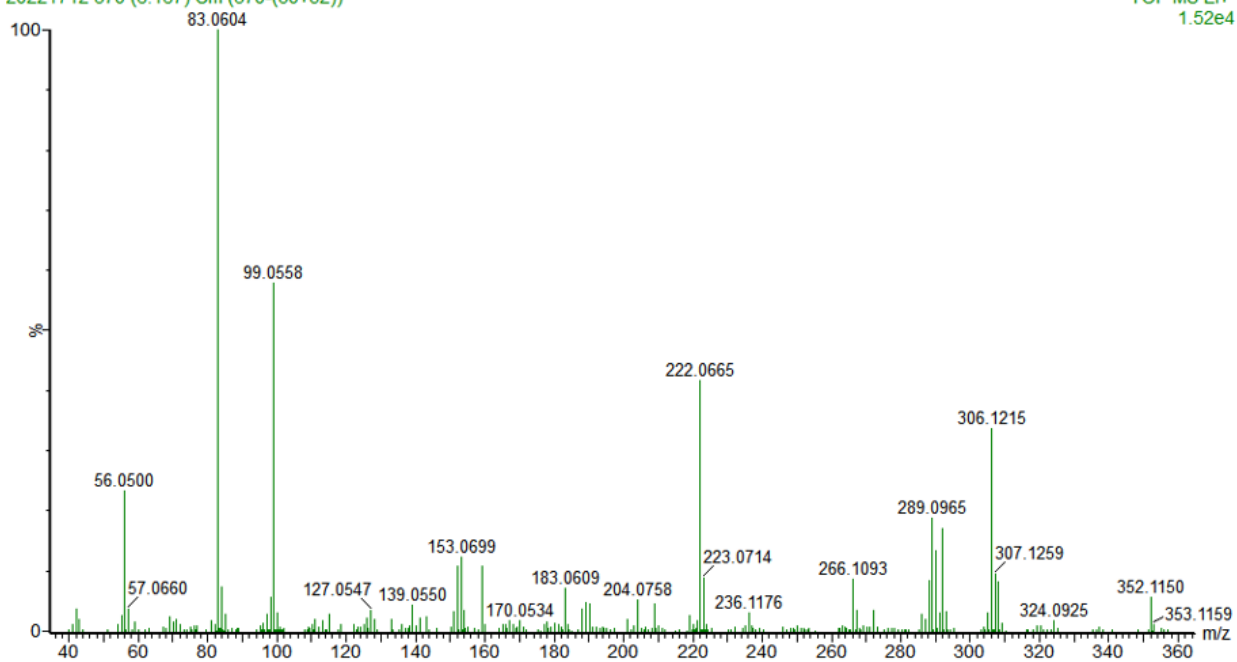

**<sup>1</sup>H NMR spectrum of 3sa (400 MHz, acetone-*d*<sub>6</sub>)**

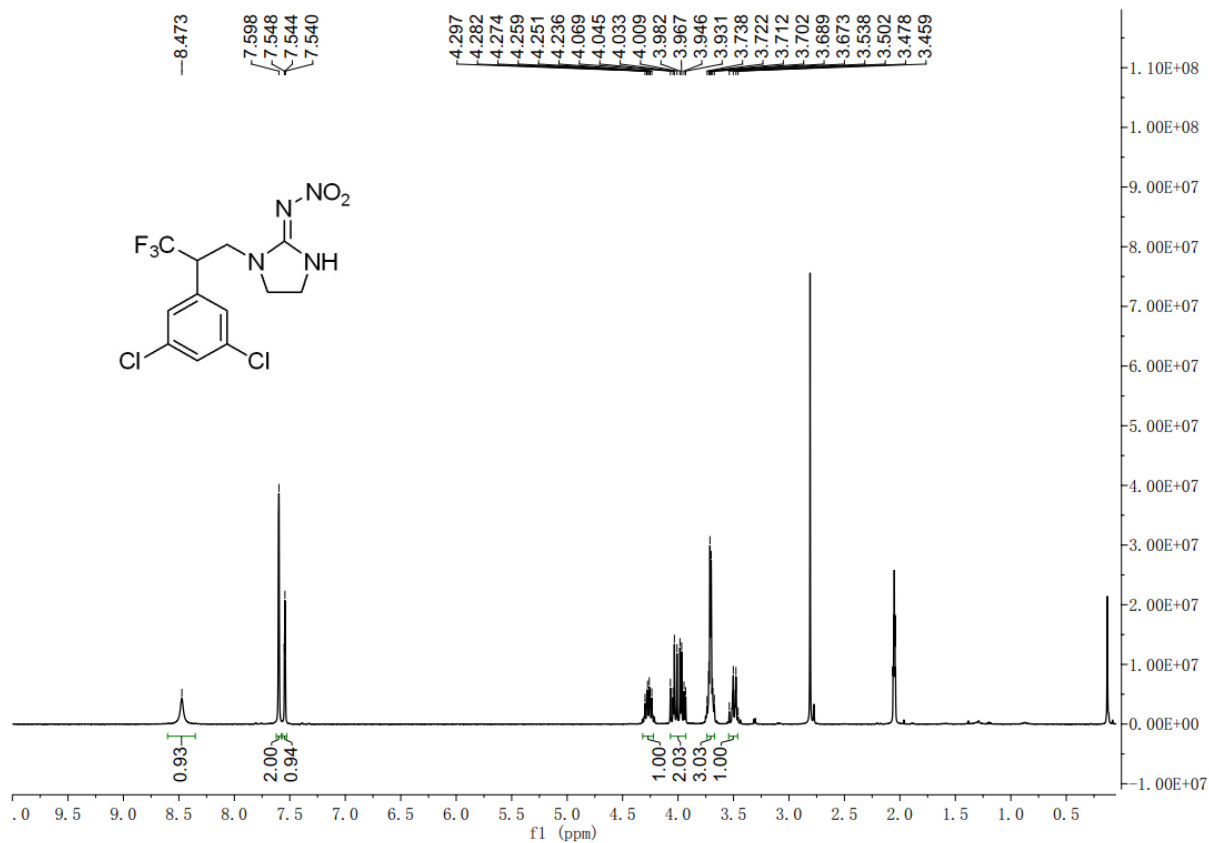

**<sup>13</sup>C NMR spectrum of 3sa (100 MHz, acetone-*d*<sub>6</sub>)**

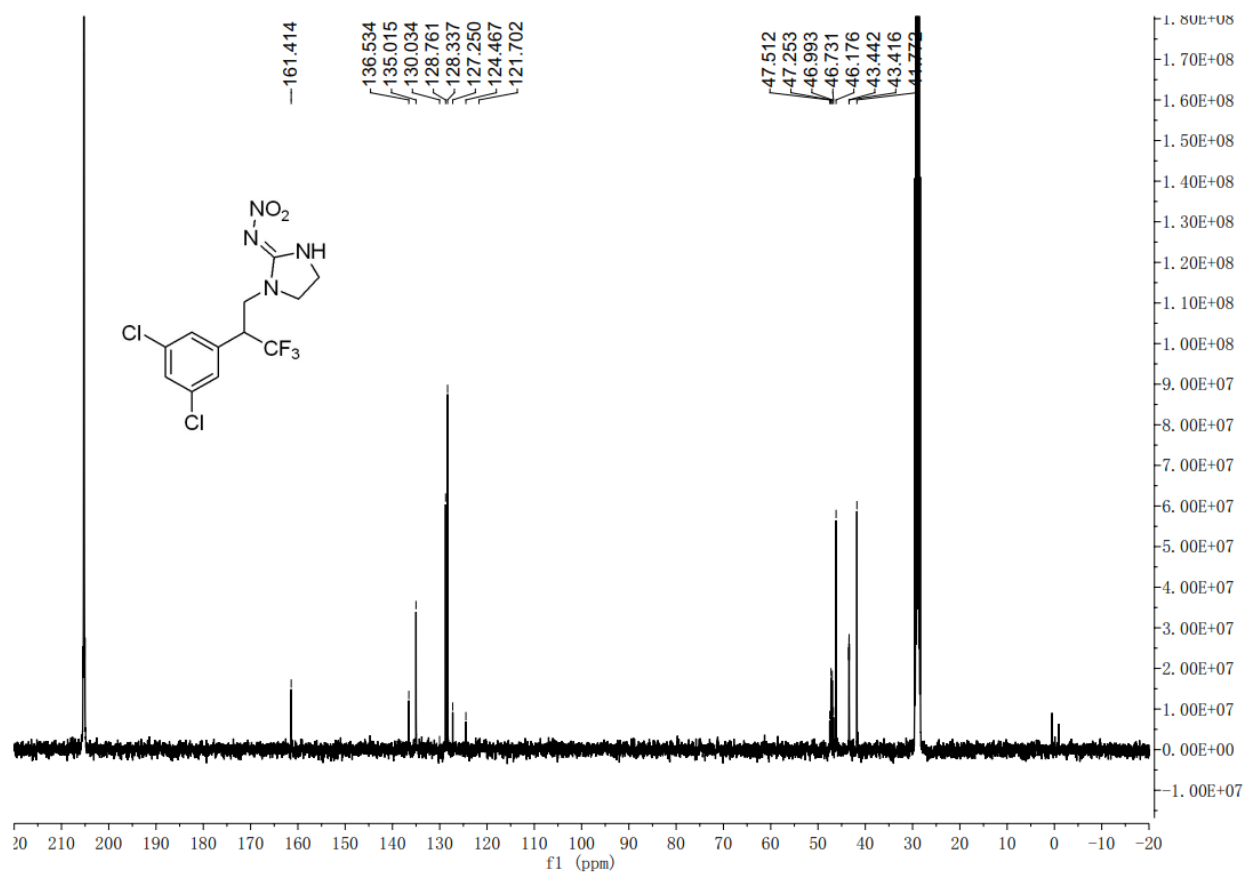

**<sup>19</sup>F NMR spectrum of 3sa (564 MHz, acetone-*d*<sub>6</sub>)**

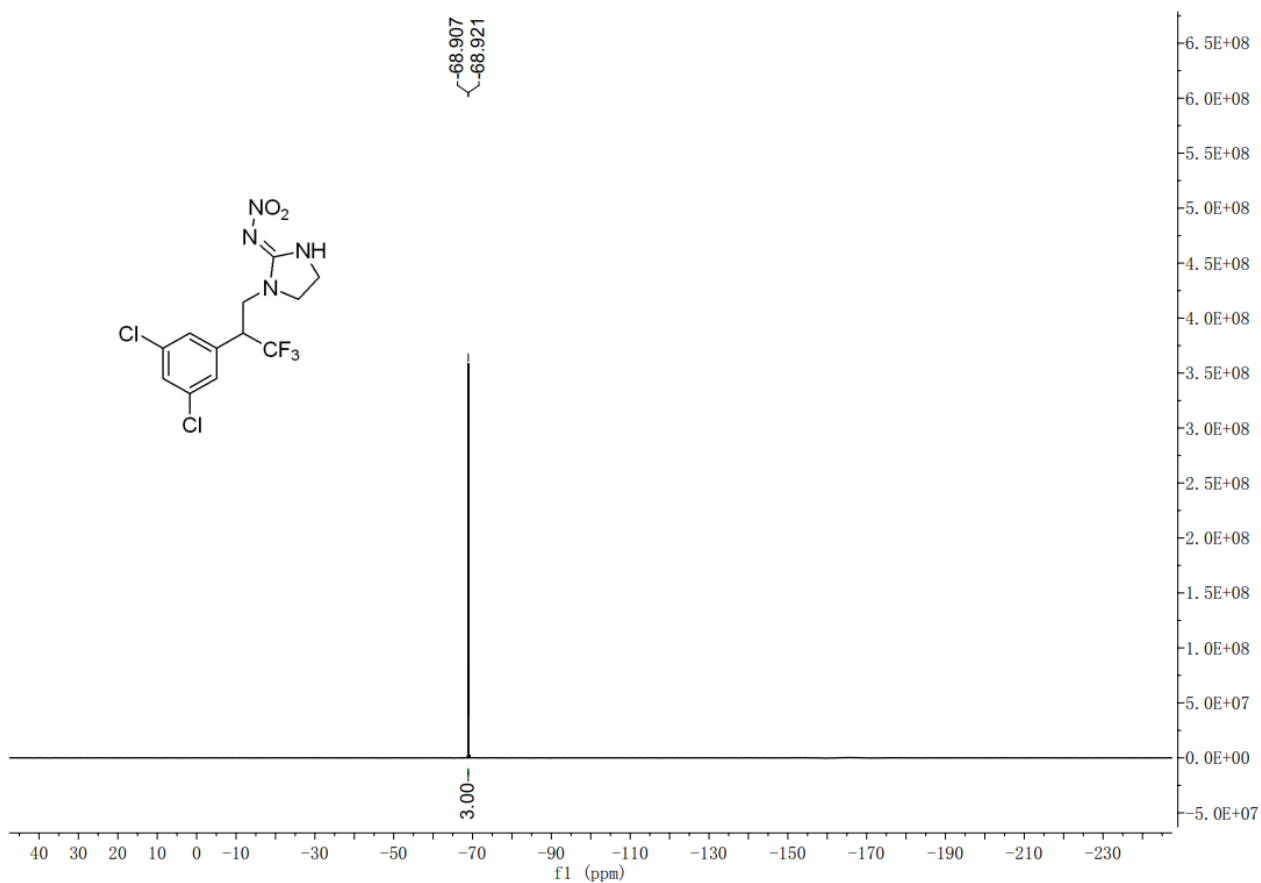

**HRMS (EI) spectrum of 3sa**

20221713 575 (9.591) Cm (575-(25+81))

TOF MS EI+  
5.01e4

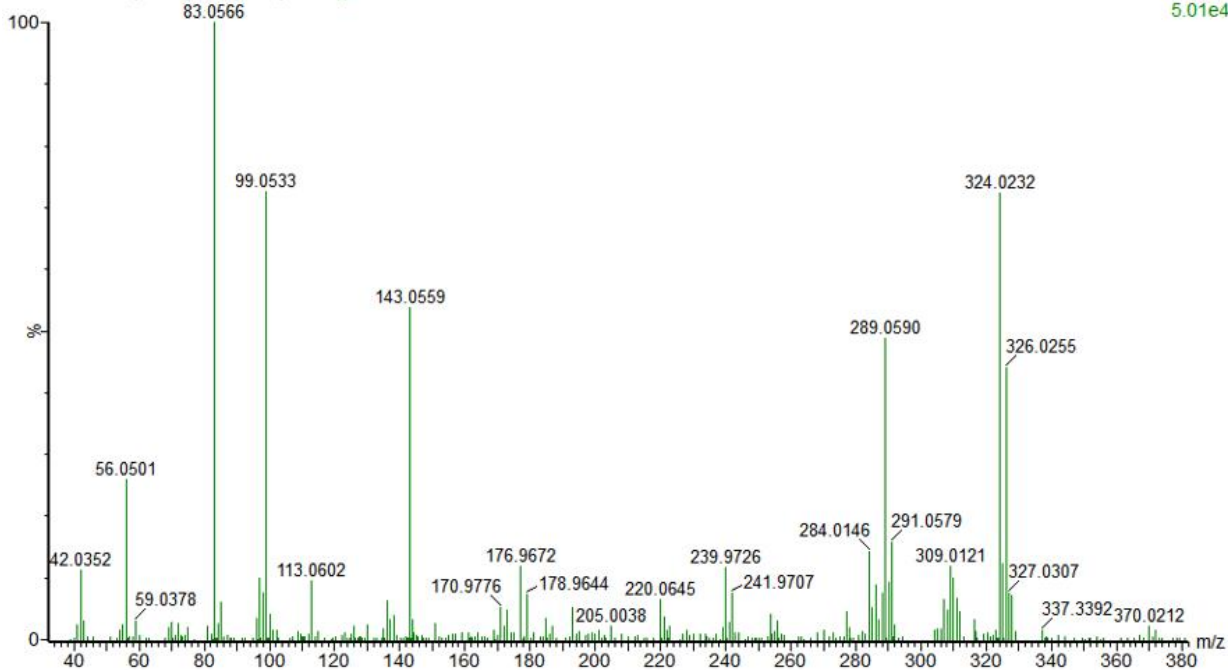

**<sup>1</sup>H NMR spectrum of 3ta (400 MHz, CDCl<sub>3</sub>)**

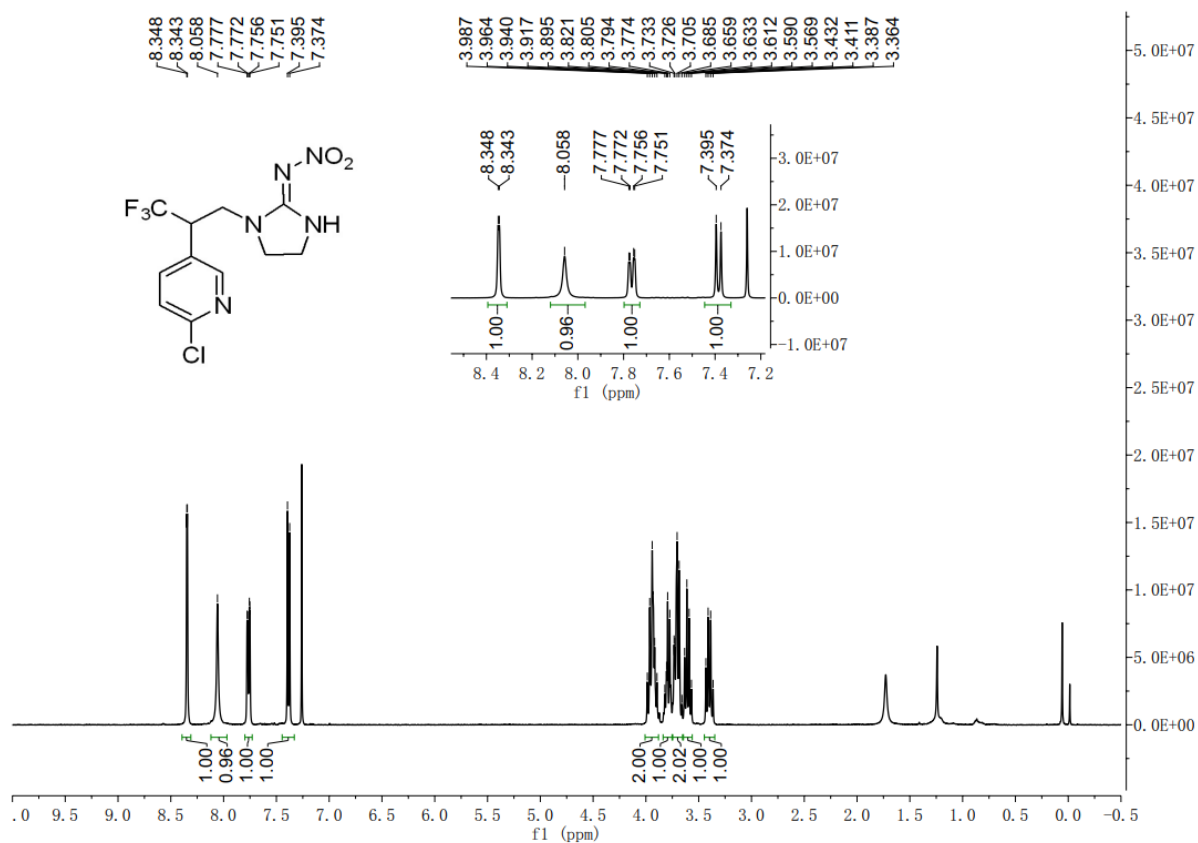

**<sup>13</sup>C NMR spectrum of 3ta (100 MHz, CDCl<sub>3</sub>)**

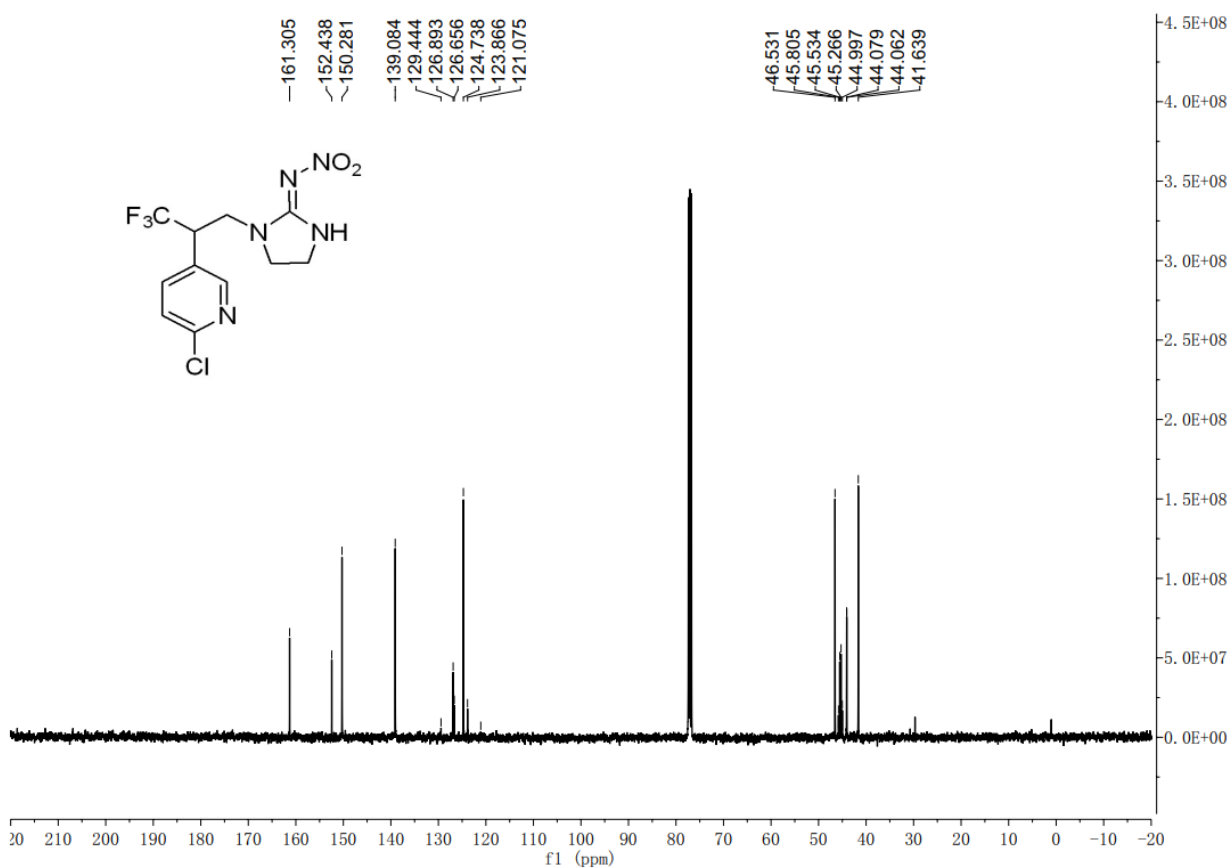

**$^{19}\text{F}$  NMR spectrum of 3ta (564 MHz,  $\text{CDCl}_3$ )**

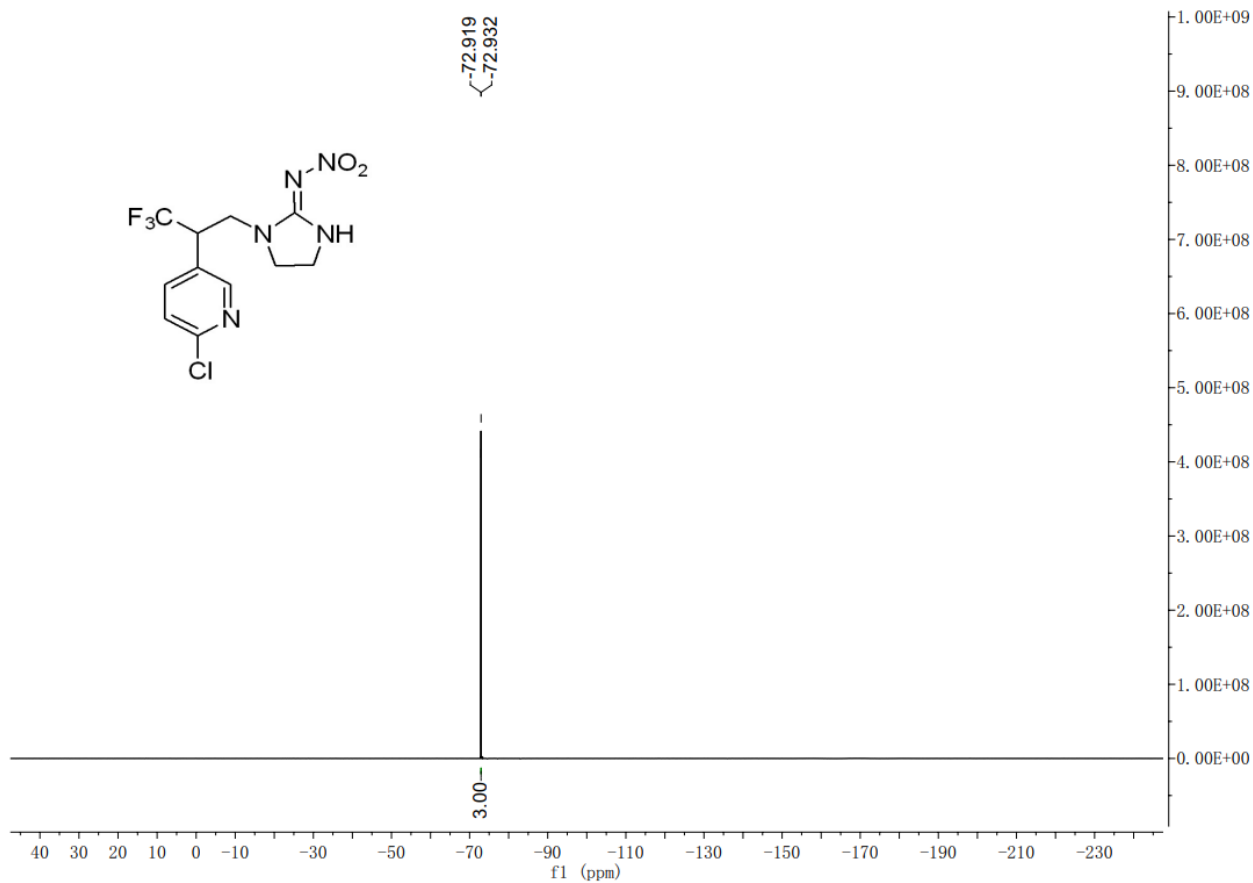

**HRMS (EI) spectrum of 3ta**

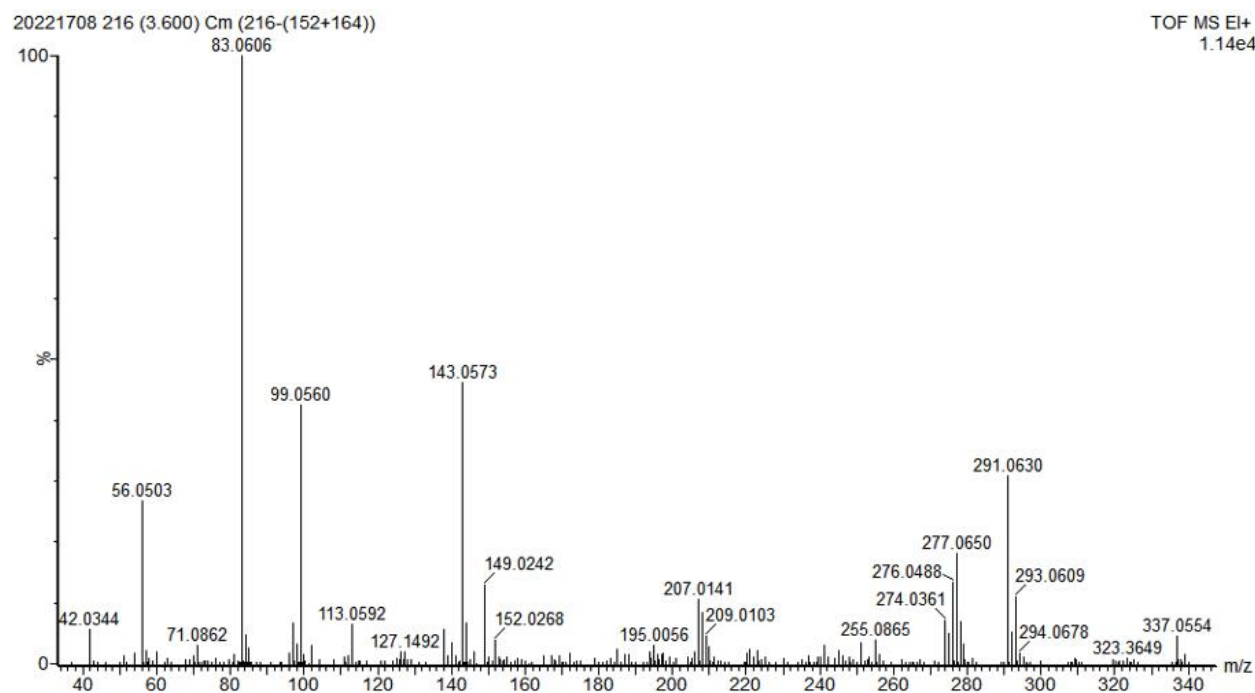

**<sup>1</sup>H NMR spectrum of 3cb (400 MHz, CDCl<sub>3</sub>)**

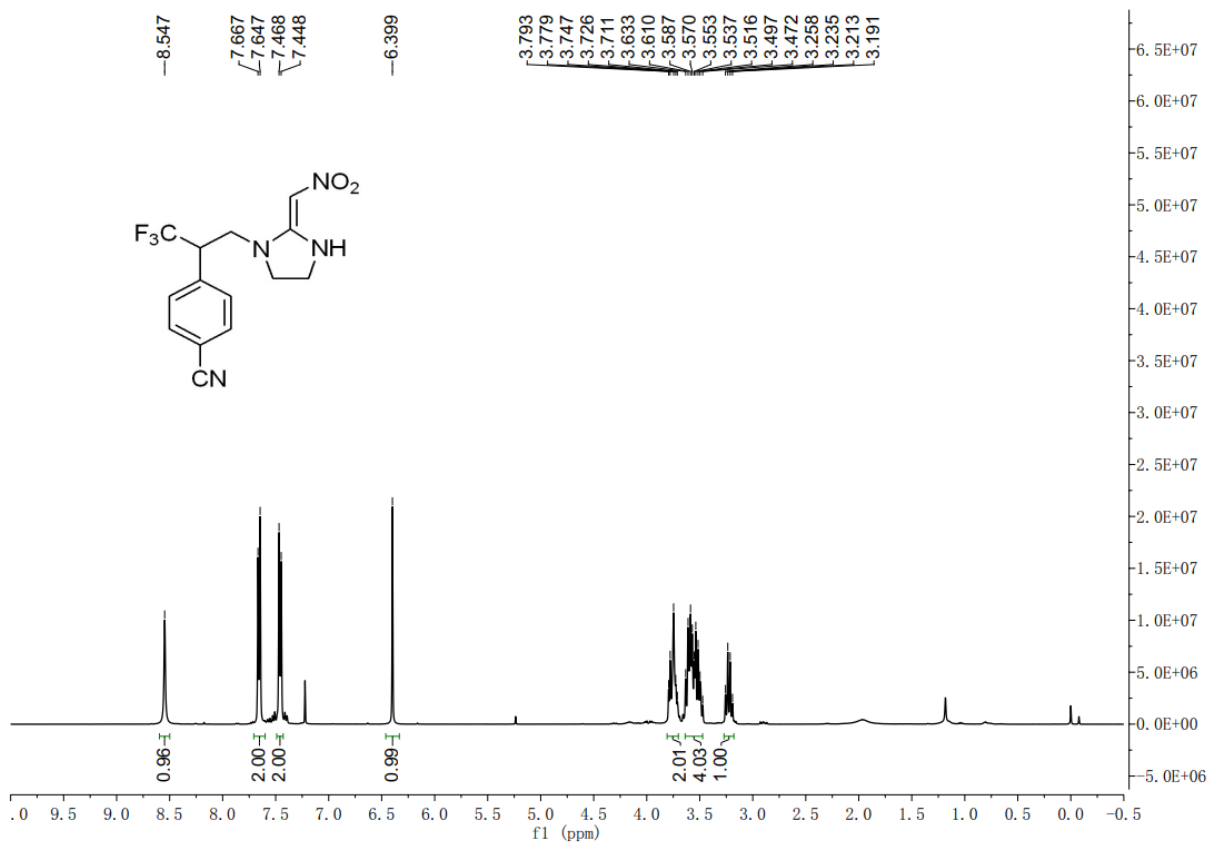

**<sup>13</sup>C NMR spectrum of 3cb (100 MHz, CDCl<sub>3</sub>)**

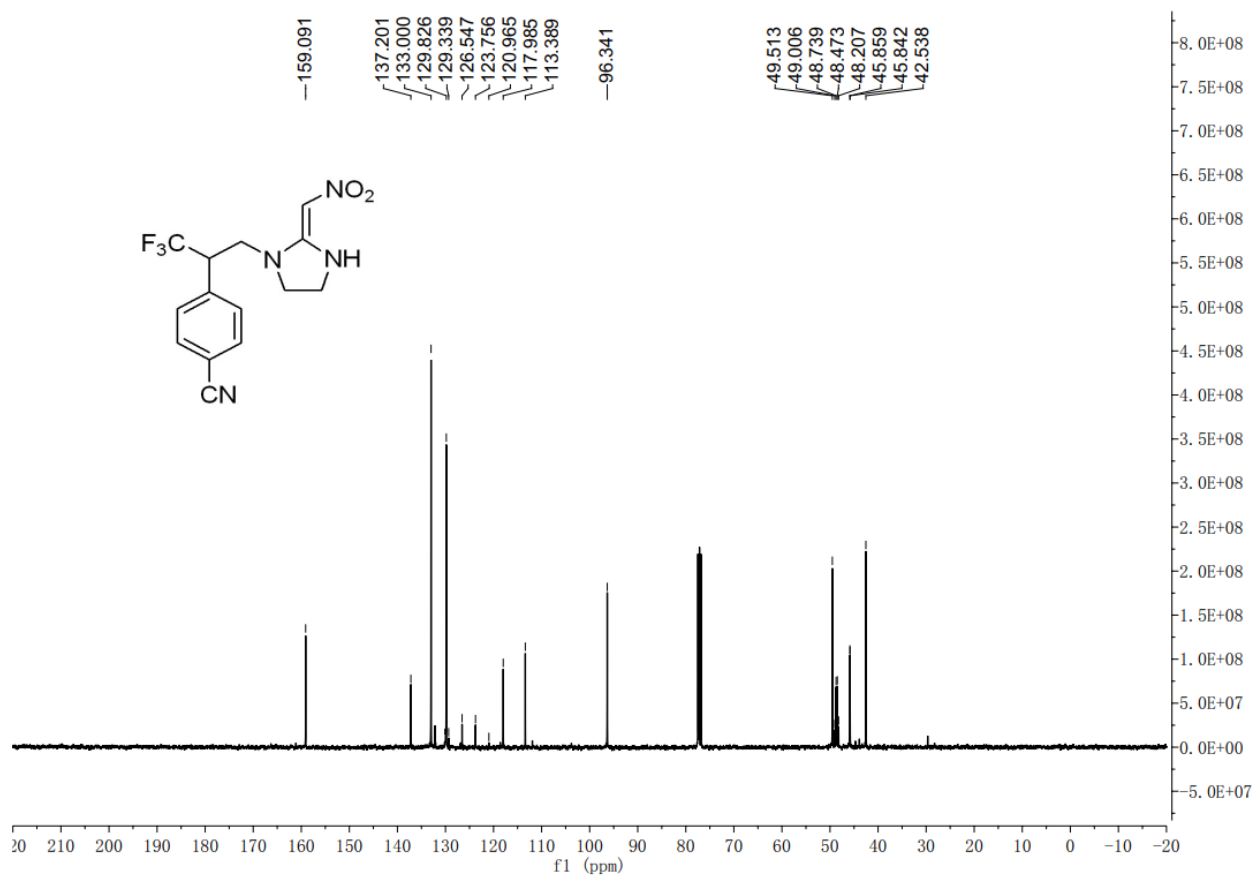

**$^{19}\text{F}$  NMR spectrum of 3cb (564 MHz,  $\text{CDCl}_3$ )**

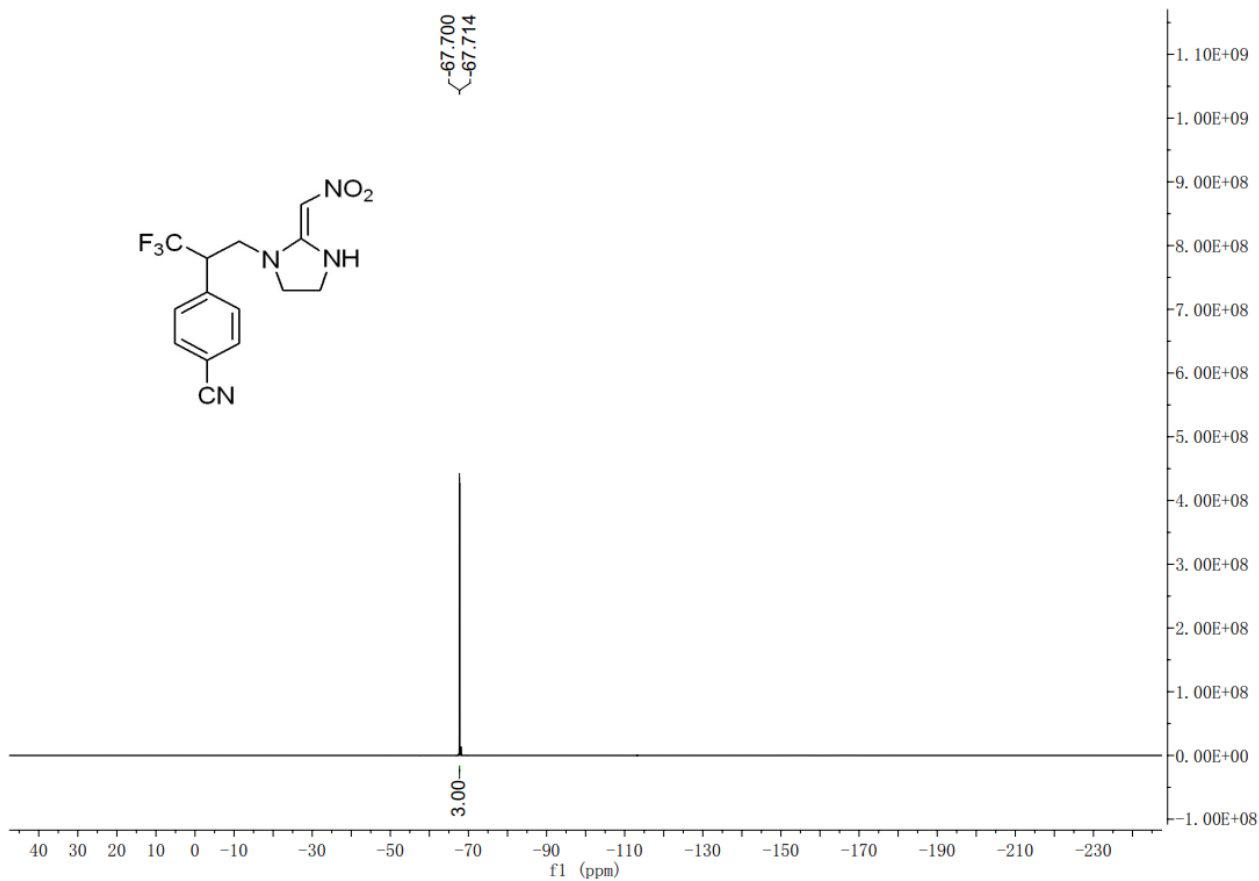

**HRMS (EI) spectrum of 3cb**

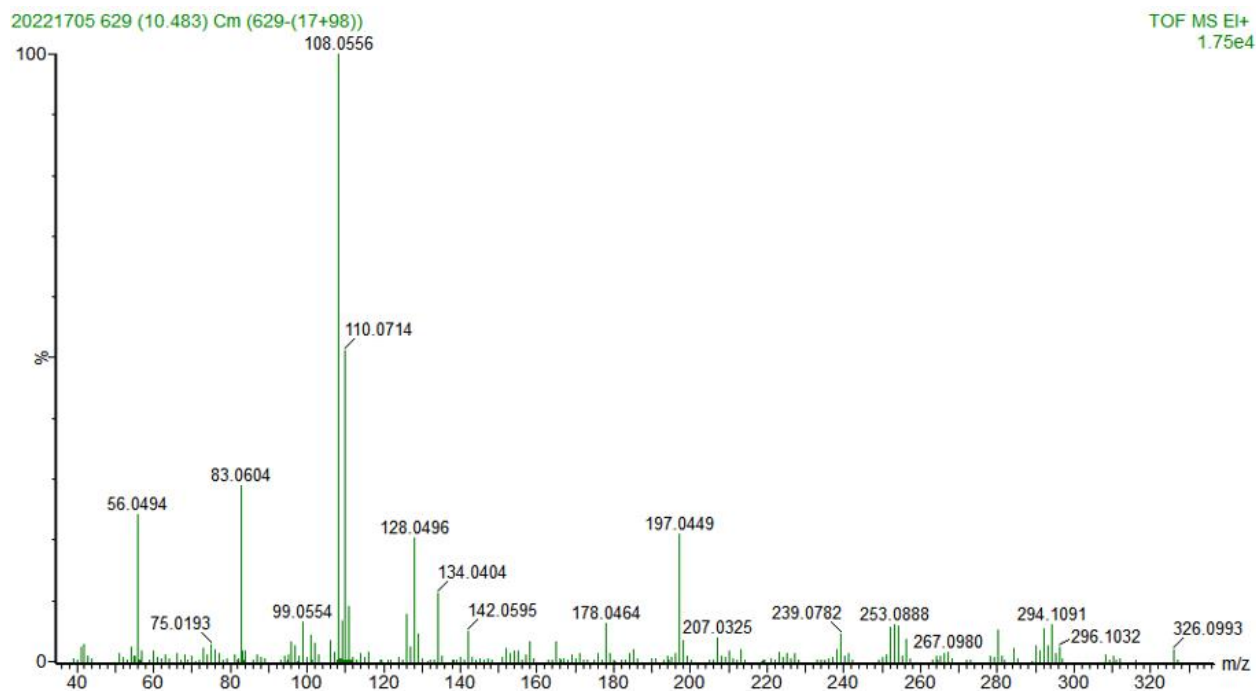

**<sup>1</sup>H NMR spectrum of 3ec (400 MHz, CDCl<sub>3</sub>)**

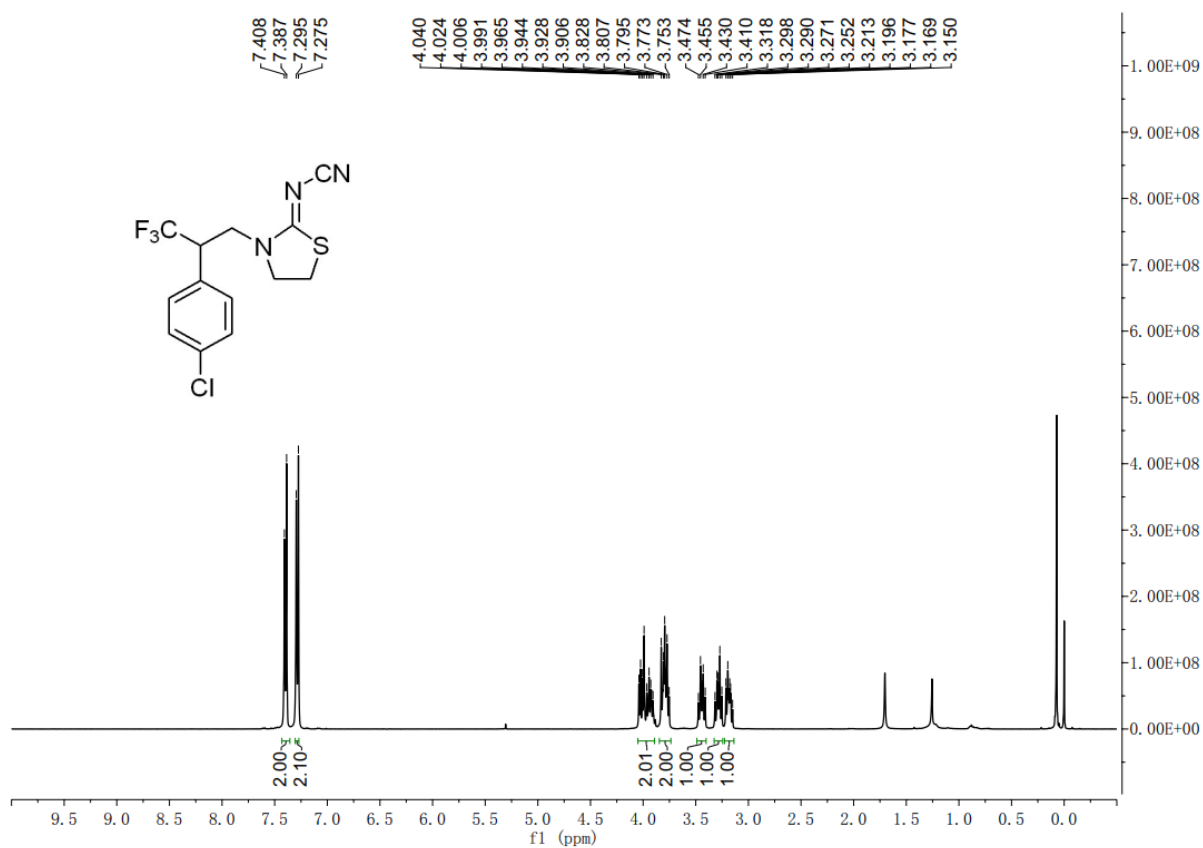

**<sup>13</sup>C NMR spectrum of 3ec (100 MHz, CDCl<sub>3</sub>)**

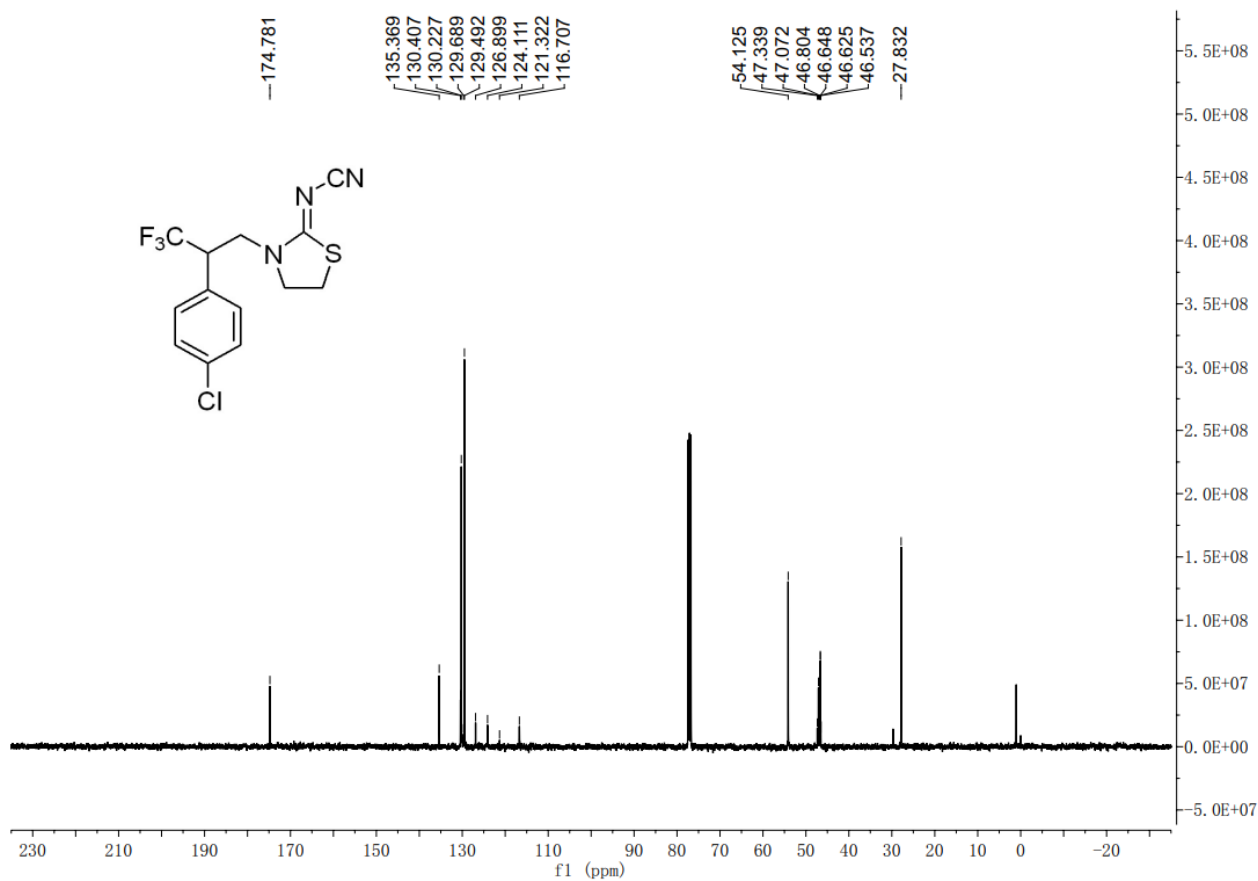



**$^{19}\text{F}$  NMR spectrum of 3ec (564 MHz,  $\text{CDCl}_3$ )**

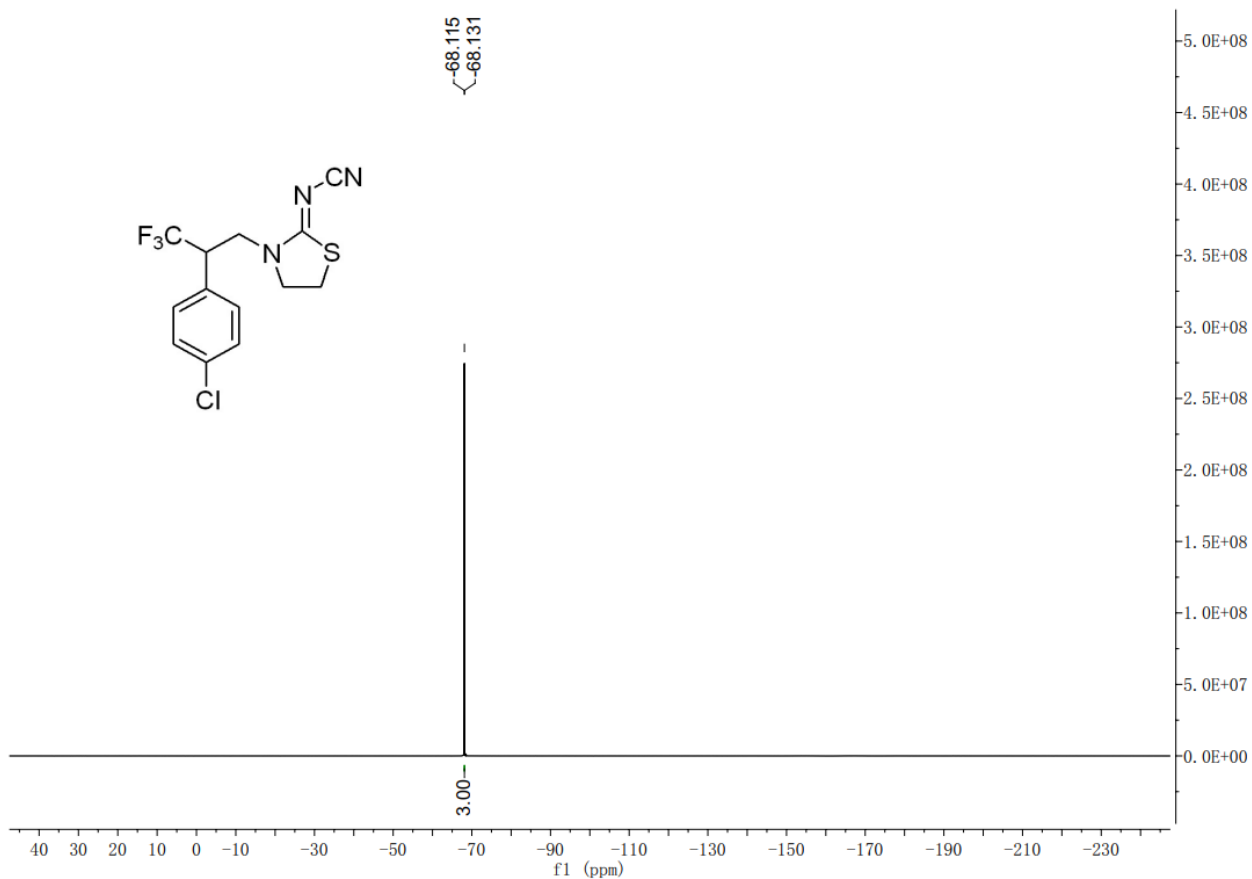

**HRMS (EI) spectrum of 3ec**

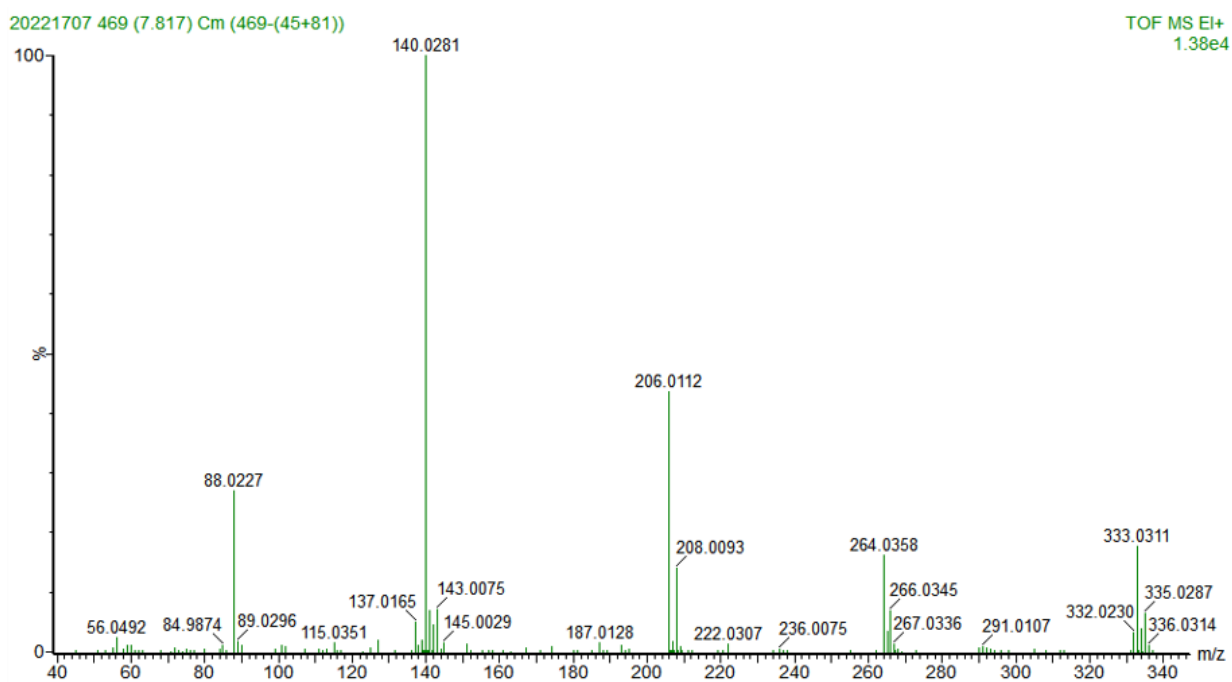

**<sup>1</sup>H NMR spectrum of 3tc (400 MHz, CDCl<sub>3</sub>)**

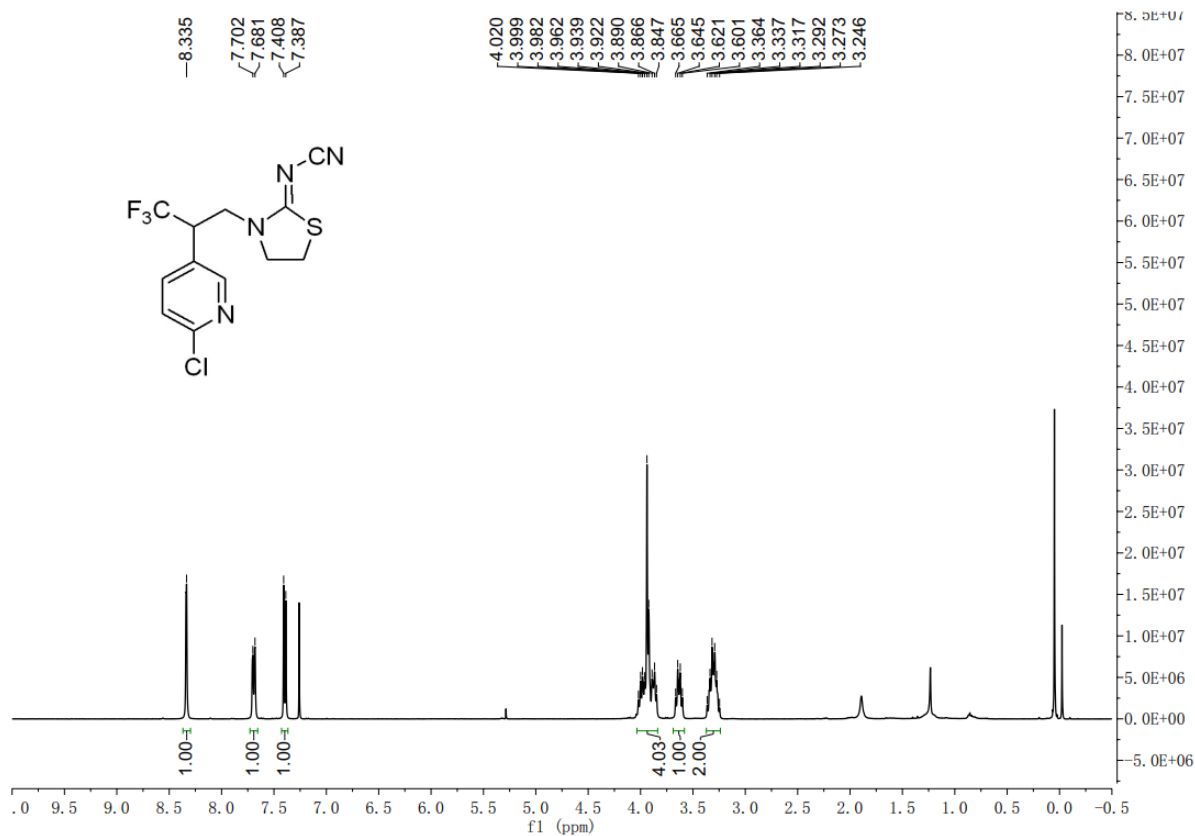

**<sup>13</sup>C NMR spectrum of 3tc (100 MHz, CDCl<sub>3</sub>)**

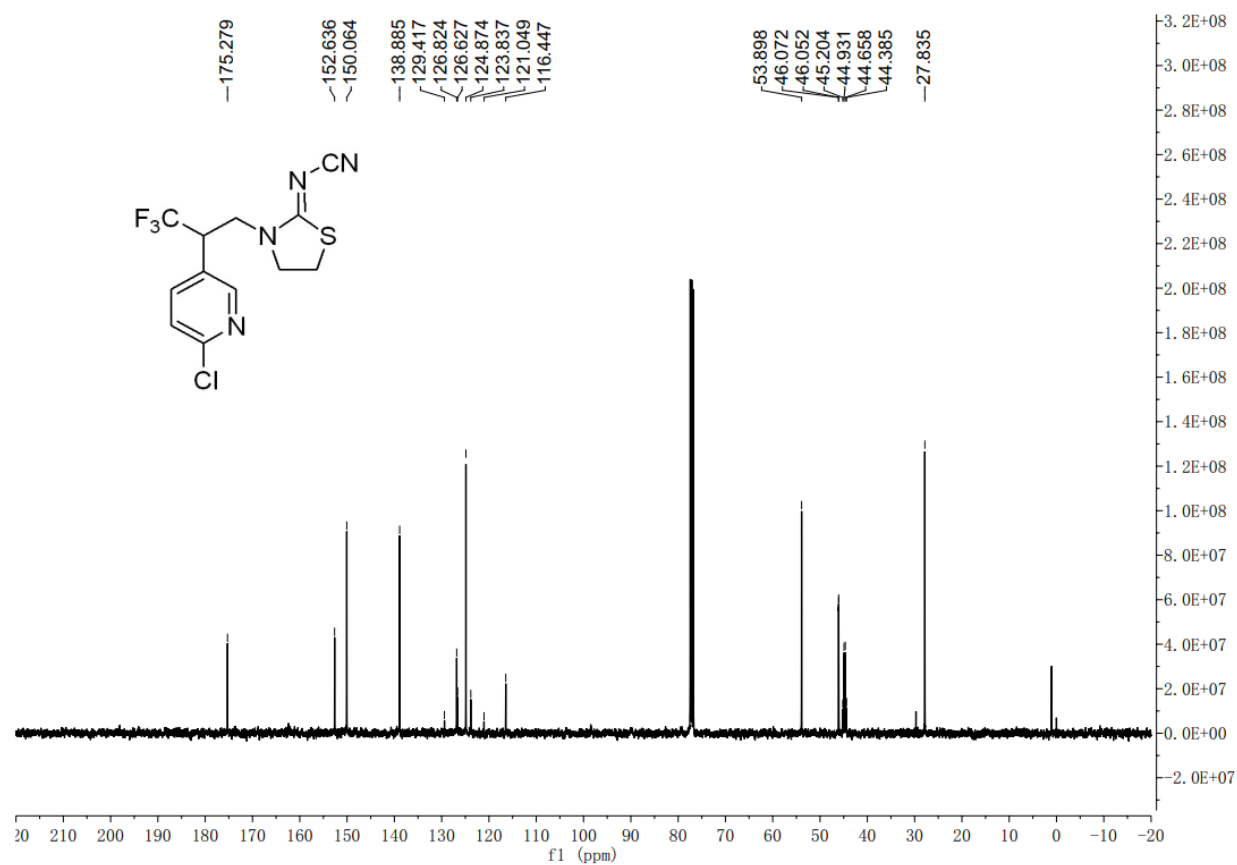

**$^{19}\text{F}$  NMR spectrum of 3tc (564 MHz,  $\text{CDCl}_3$ )**

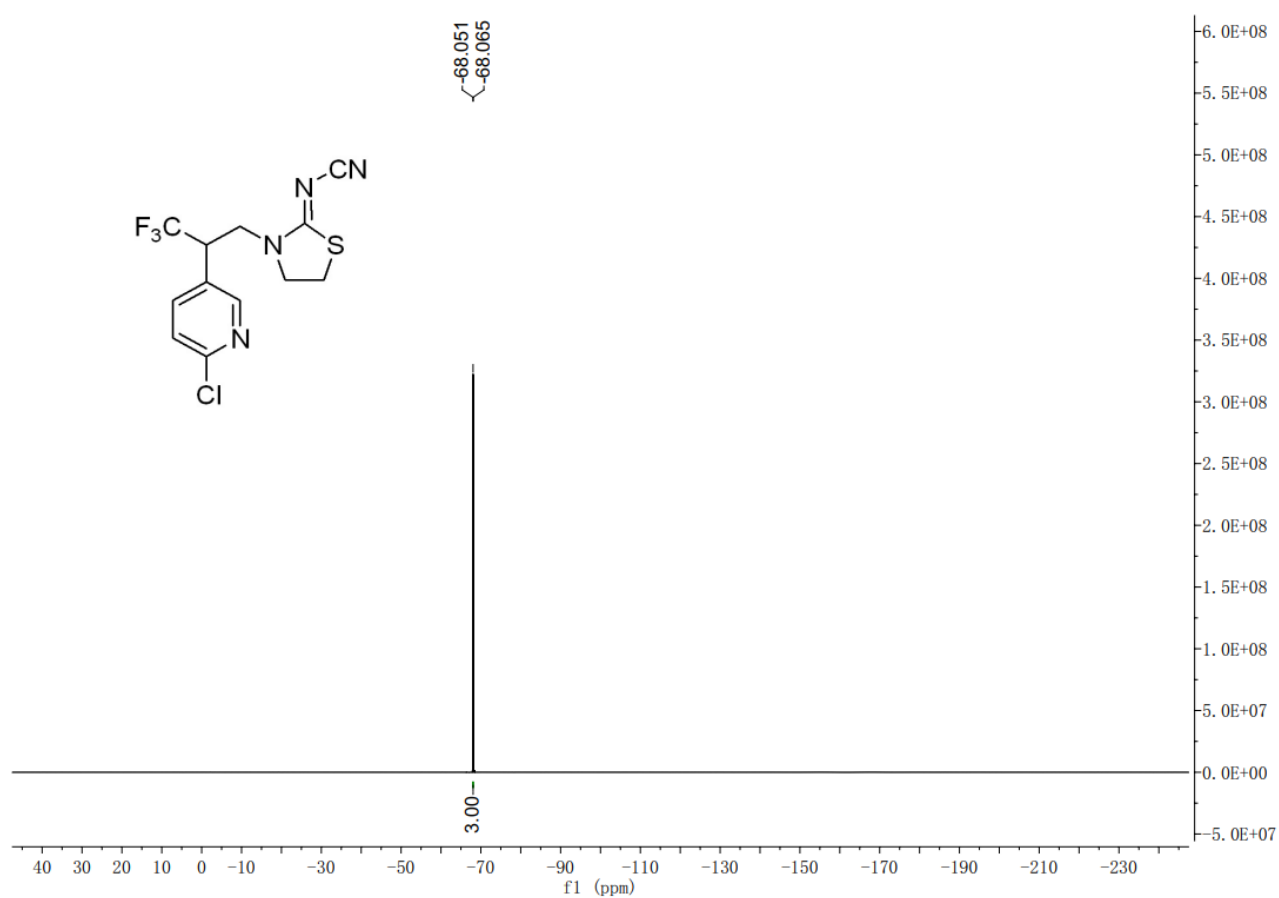

**HRMS (EI) spectrum of 3tc**

20221710 271 (4.517) Cm (271-(30+90))

TOF MS EI+  
1.40e4

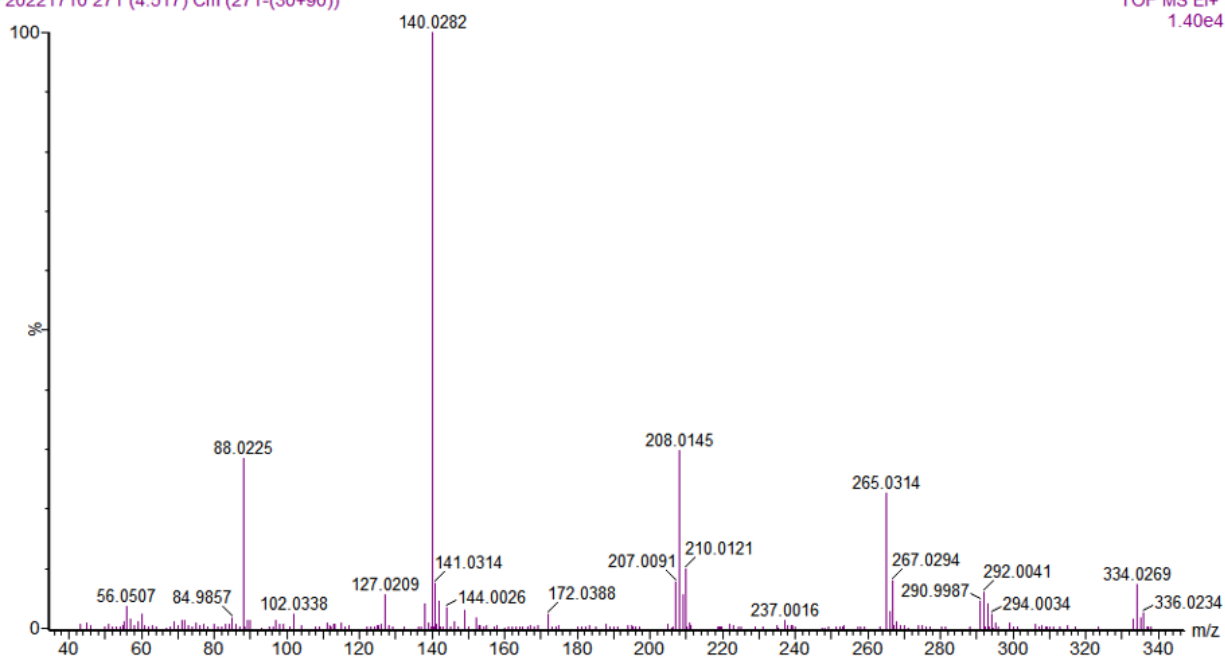

**<sup>1</sup>H NMR spectrum of 3cd (400 MHz, DMSO-*d*<sub>6</sub>)**

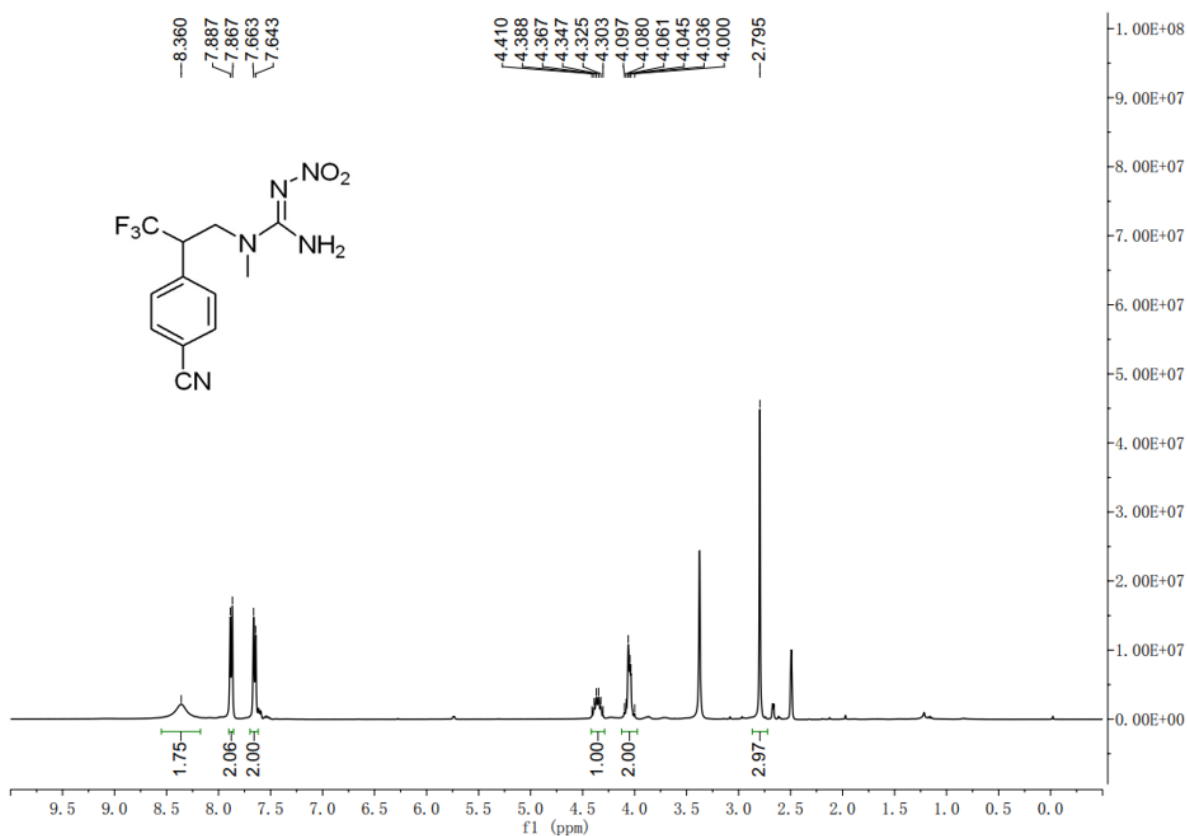

**<sup>13</sup>C NMR spectrum of 3cd (100 MHz, DMSO-*d*<sub>6</sub>)**

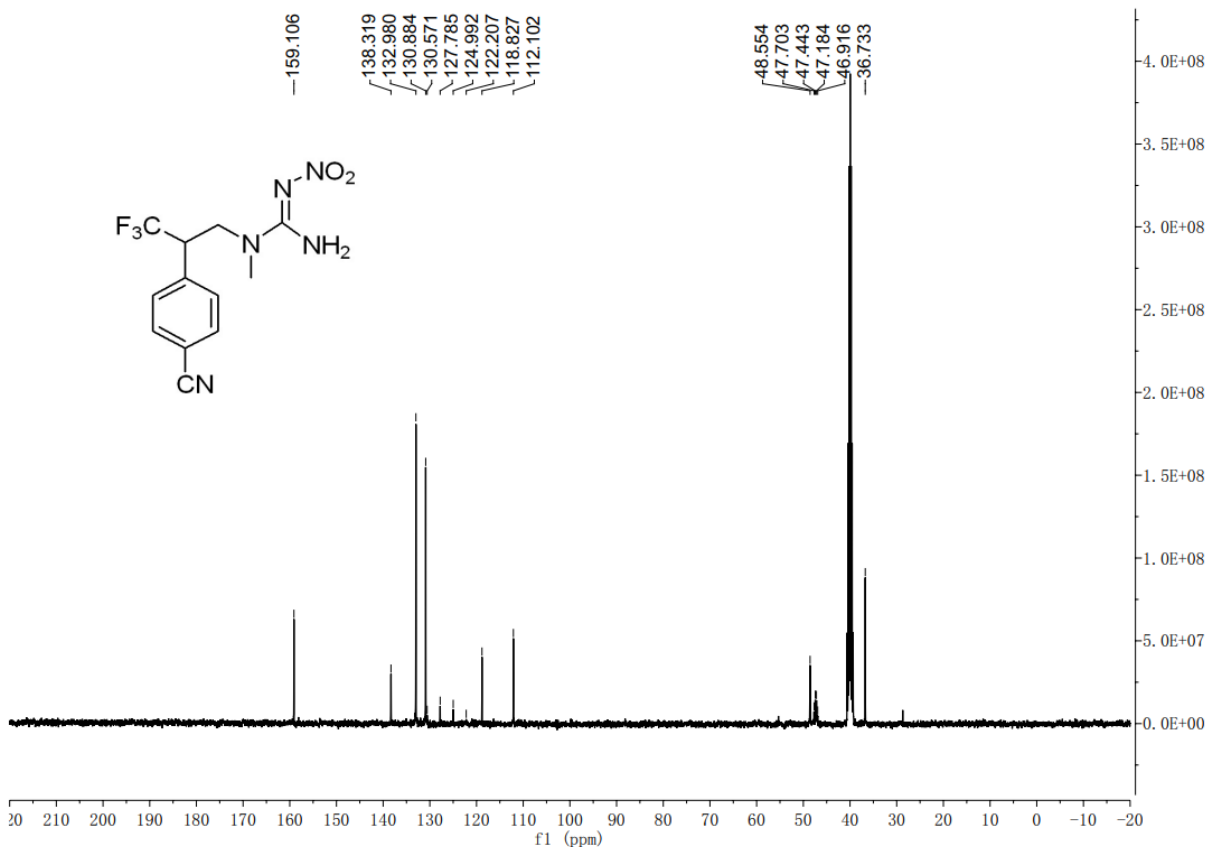

**$^{19}\text{F}$  NMR spectrum of 3cd (564 MHz,  $\text{DMSO}-d_6$ )**

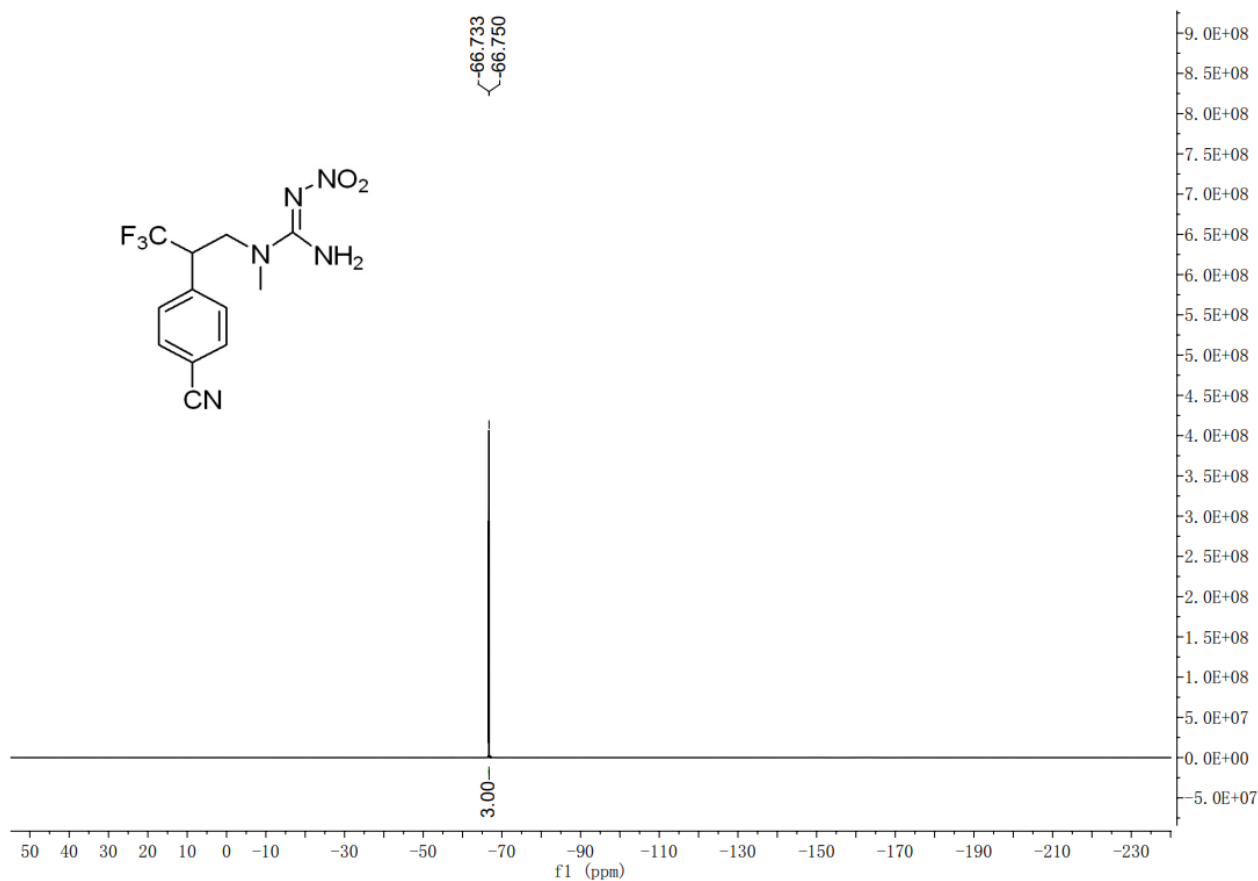

**HRMS (EI) spectrum of 3cd**

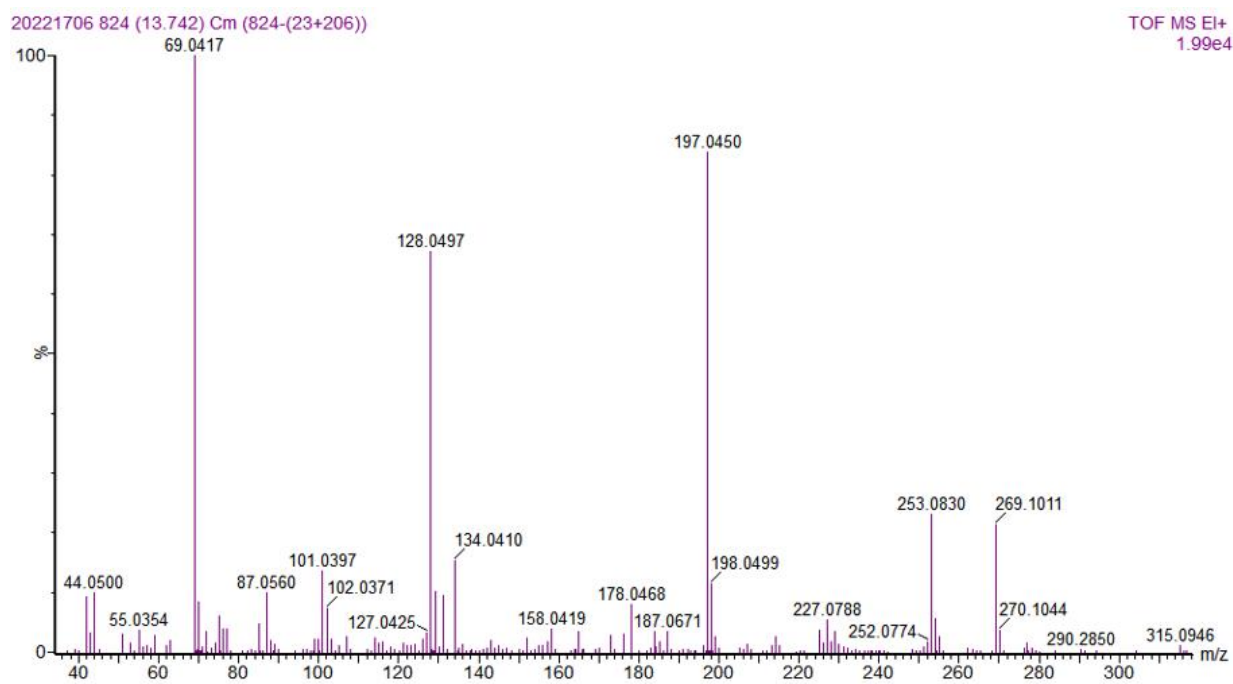

**<sup>1</sup>H NMR spectrum of 3td (400 MHz, DMSO-*d*<sub>6</sub>)**

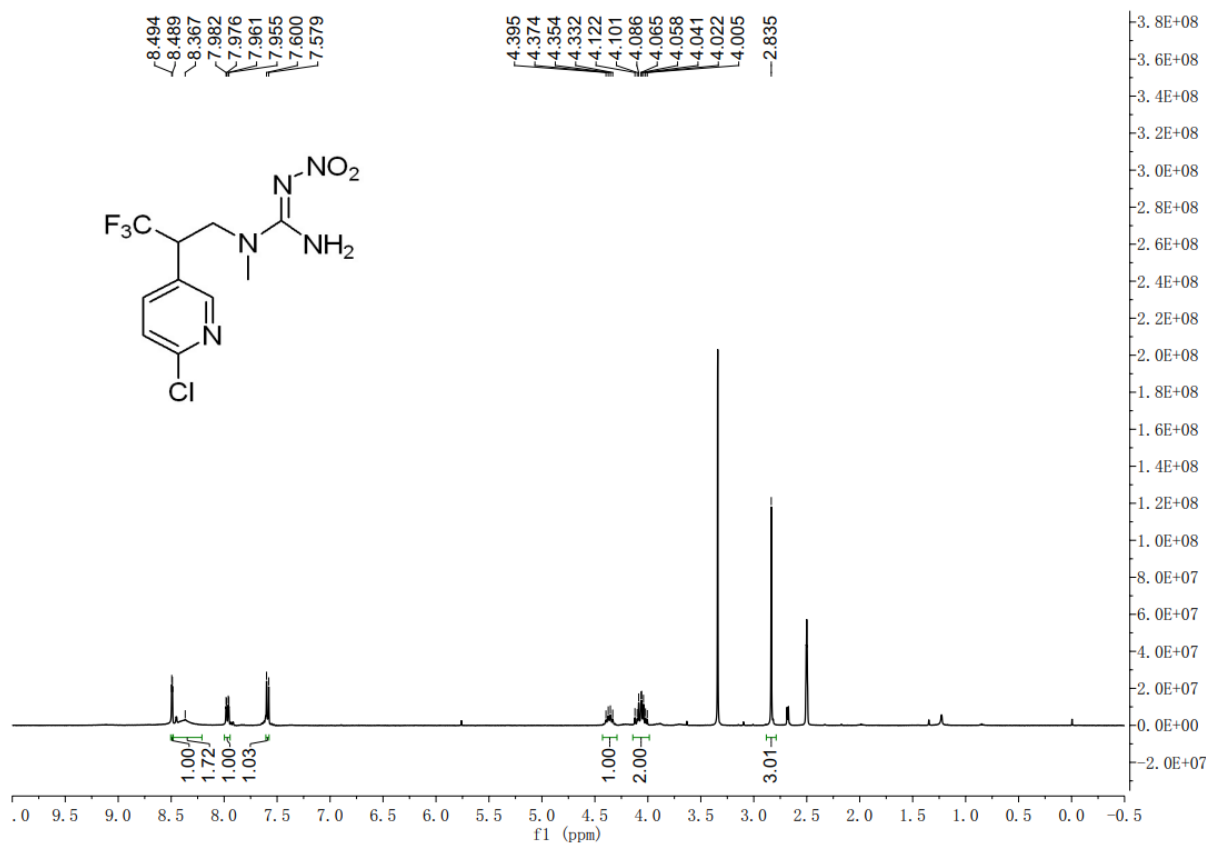

**<sup>13</sup>C NMR spectrum of 3td (150 MHz, DMSO-*d*<sub>6</sub>)**

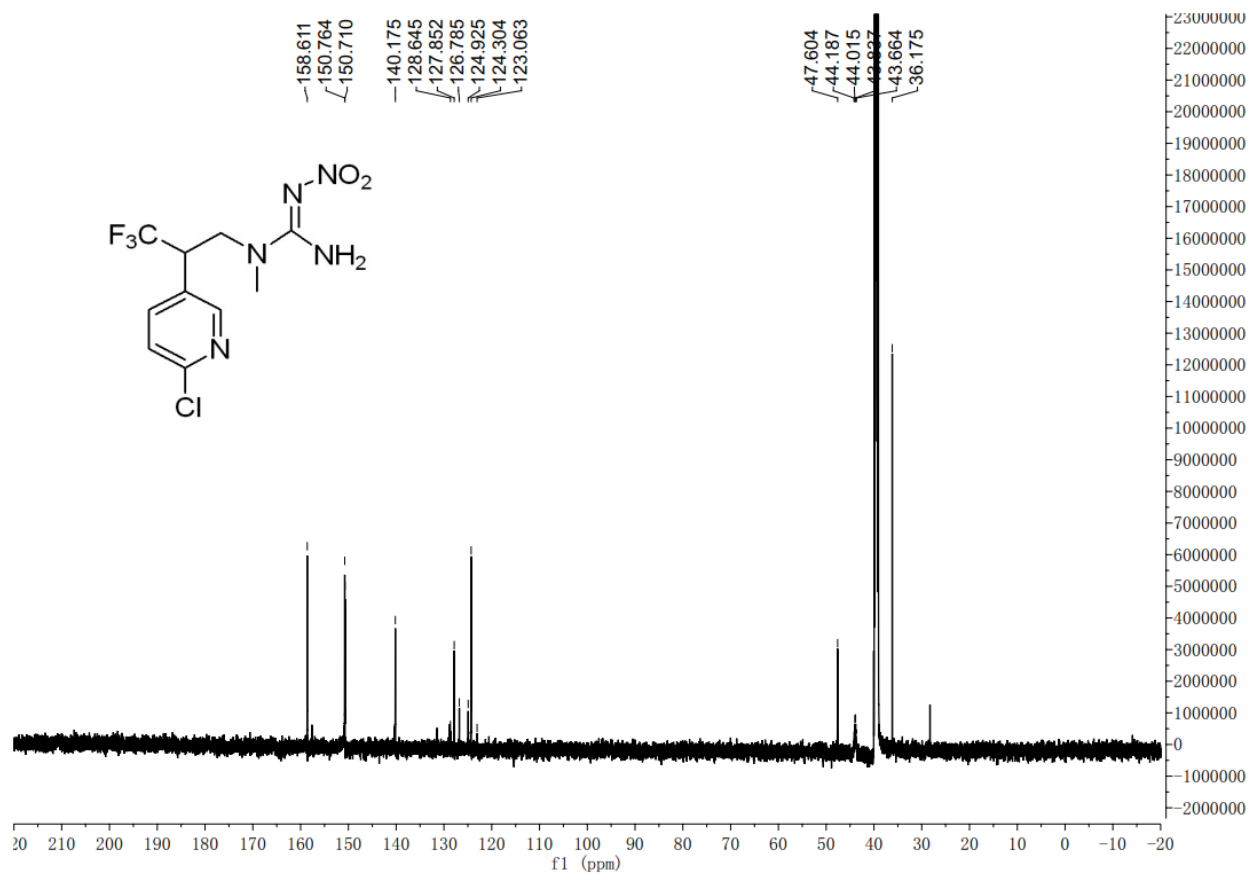

**$^{19}\text{F}$  NMR spectrum of 3td (564 MHz,  $\text{DMSO-}d_6$ )**

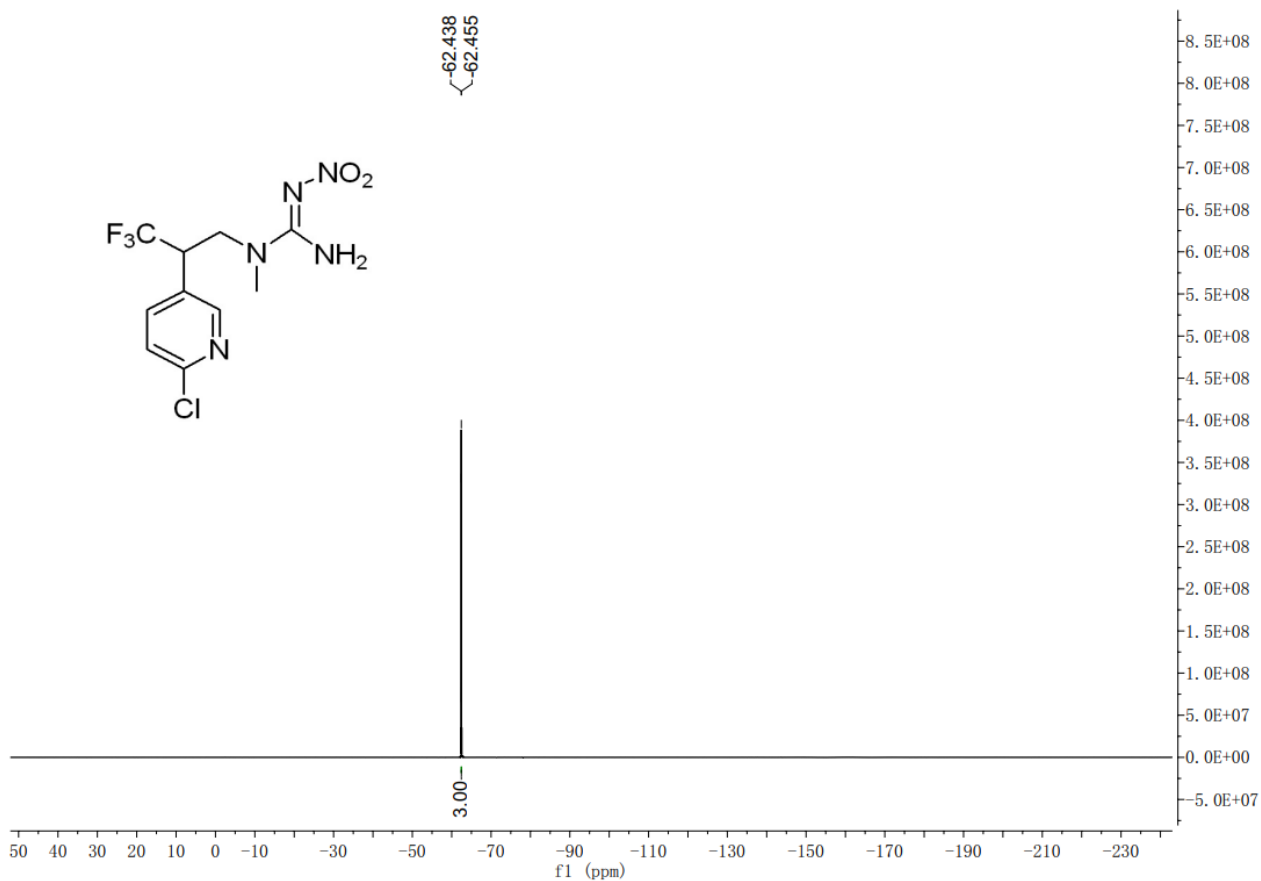

**HRMS (EI) spectrum of 3td**

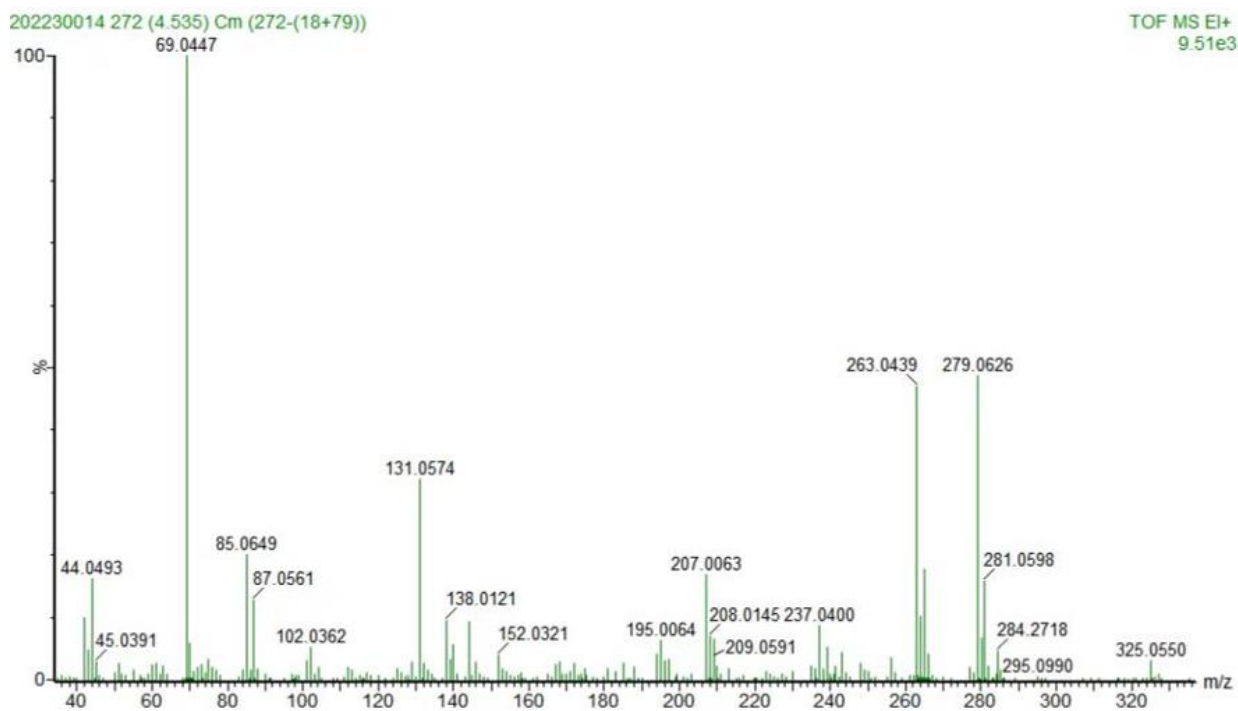

**<sup>1</sup>H NMR spectrum of 4aa (400 MHz, CDCl<sub>3</sub>)**

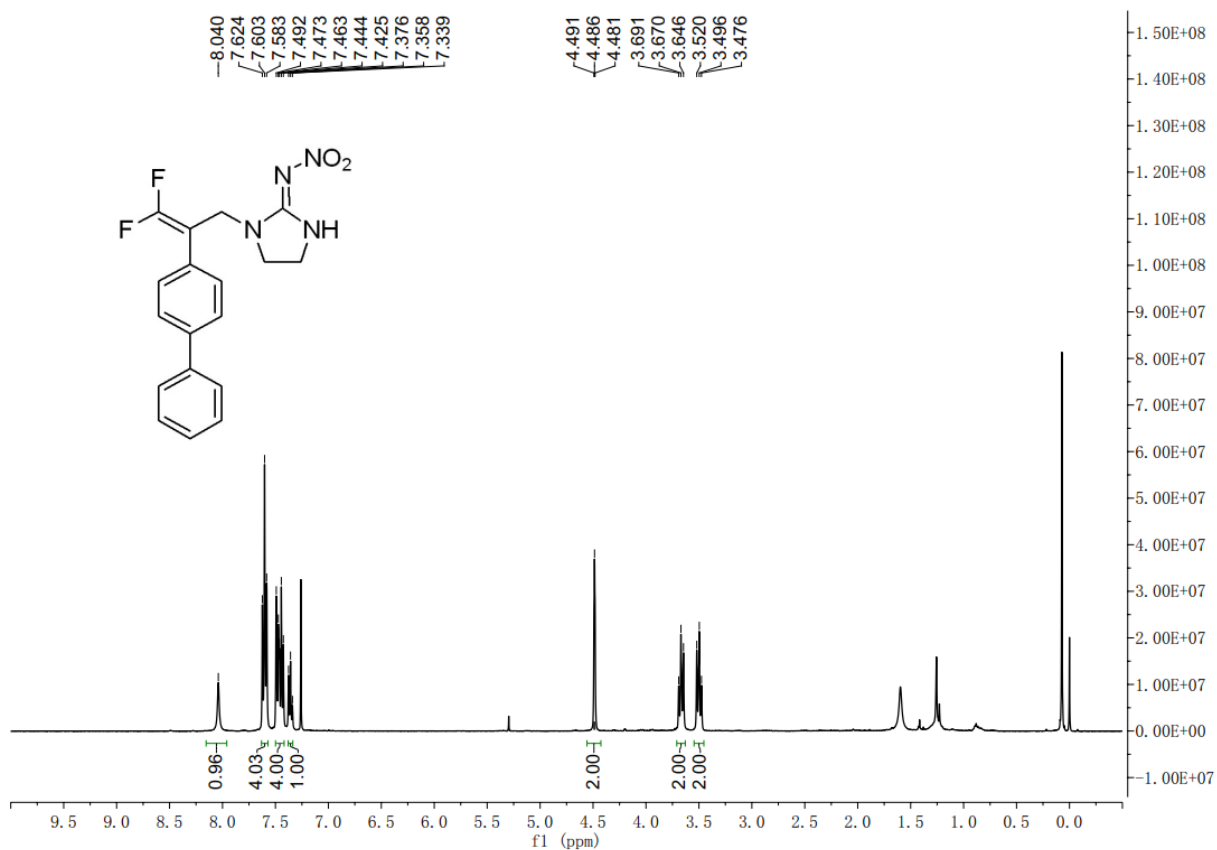

**<sup>13</sup>C NMR spectrum of 4aa (100 MHz, CDCl<sub>3</sub>)**

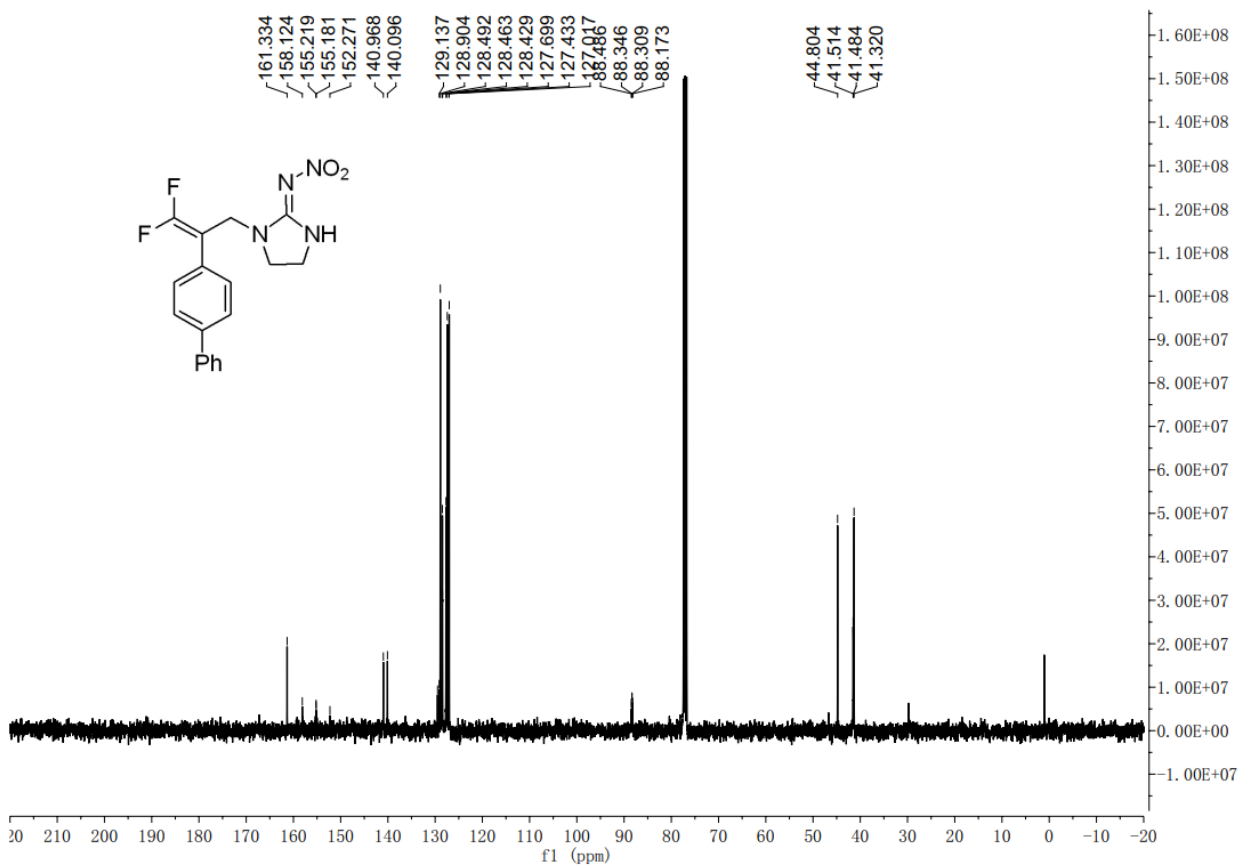



**<sup>19</sup>F NMR spectrum of 4aa (564 MHz, CDCl<sub>3</sub>)**

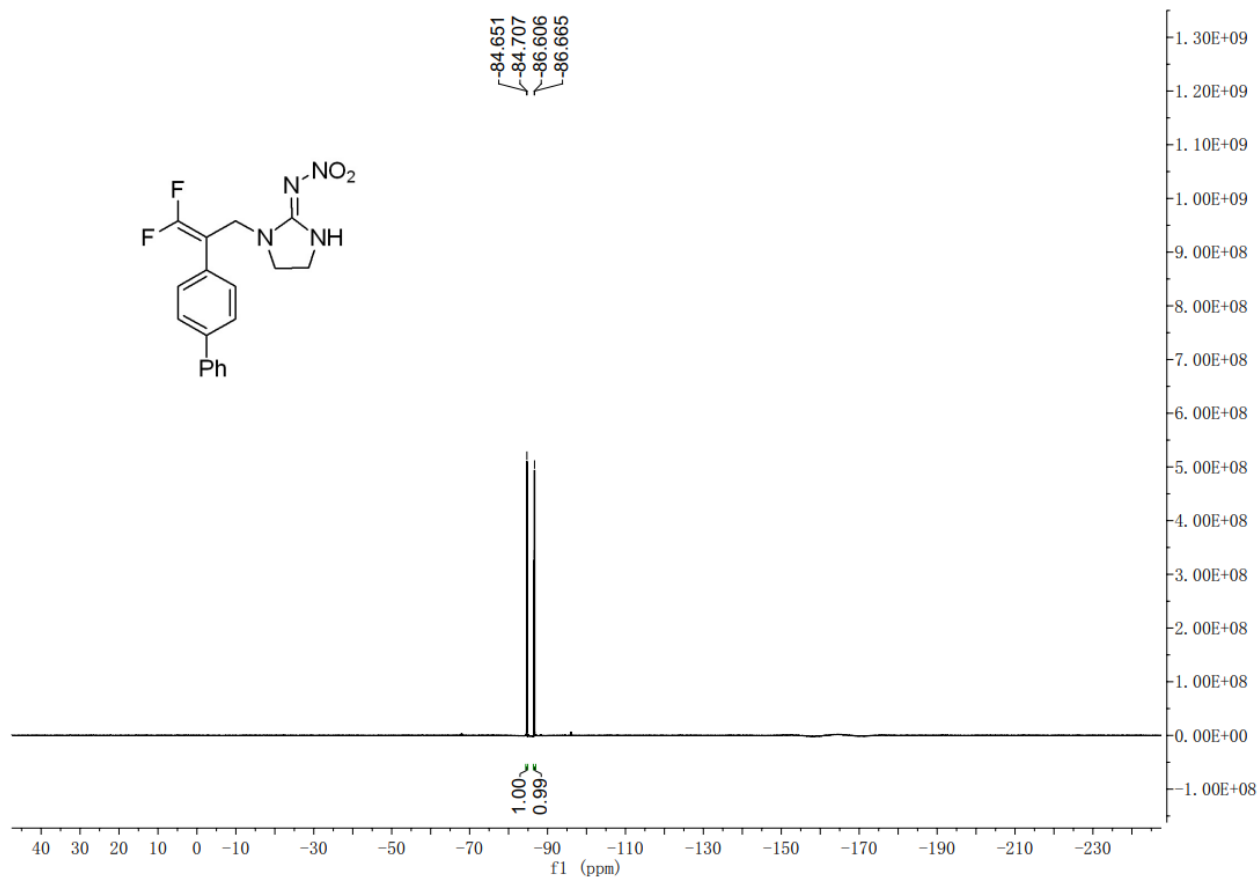

**HRMS (ESI) spectrum of 4aa**

Monoisotopic Mass, Even Electron Ions

78 formula(e) evaluated with 1 results within limits (all results (up to 1000) for each mass)

Elements Used:

C: 18-18 H: 16-16 N: 0-8 O: 0-6 F: 2-3 Na: 1-1

15

221219-2-1-- 21 (0.135)

1: TOF MS ES+  
4.83e+006

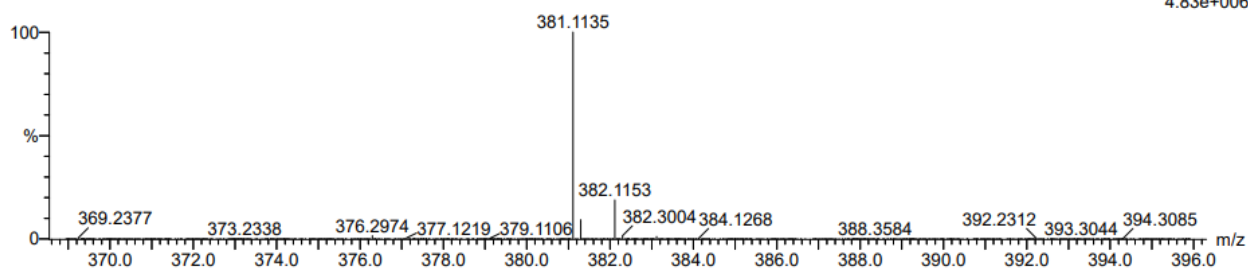

Minimum:

Maximum: 5.0 50.0 -1.5

| Mass     | Calc. Mass | mDa  | PPM  | DBE  | i-FIT | Norm | Conf(%) | Formula             |
|----------|------------|------|------|------|-------|------|---------|---------------------|
| 381.1135 | 381.1139   | -0.4 | -1.0 | 11.5 | 767.1 | n/a  | n/a     | C18 H16 N4 O2 F2 Na |

**<sup>1</sup>H NMR spectrum of 4fa (400 MHz, CDCl<sub>3</sub>)**

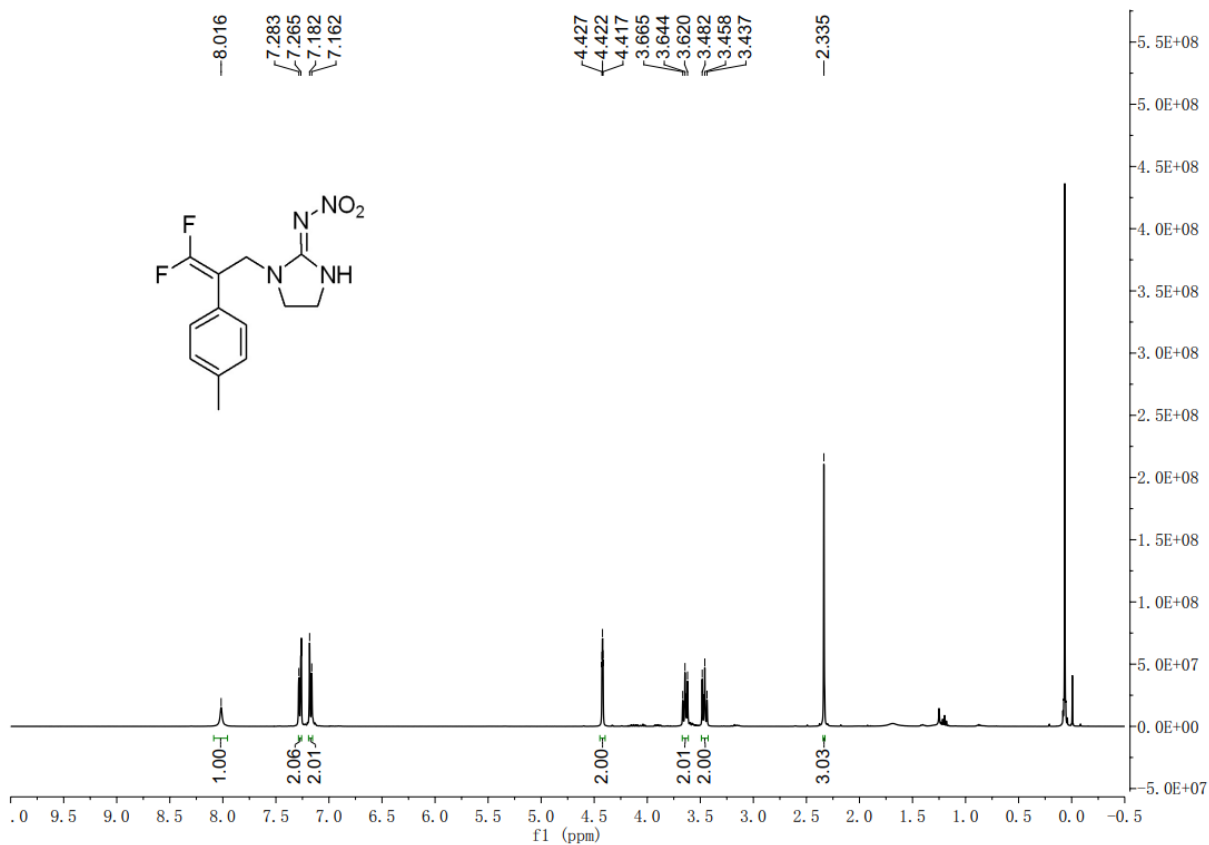

**<sup>13</sup>C NMR spectrum of 4fa (100 MHz, CDCl<sub>3</sub>)**

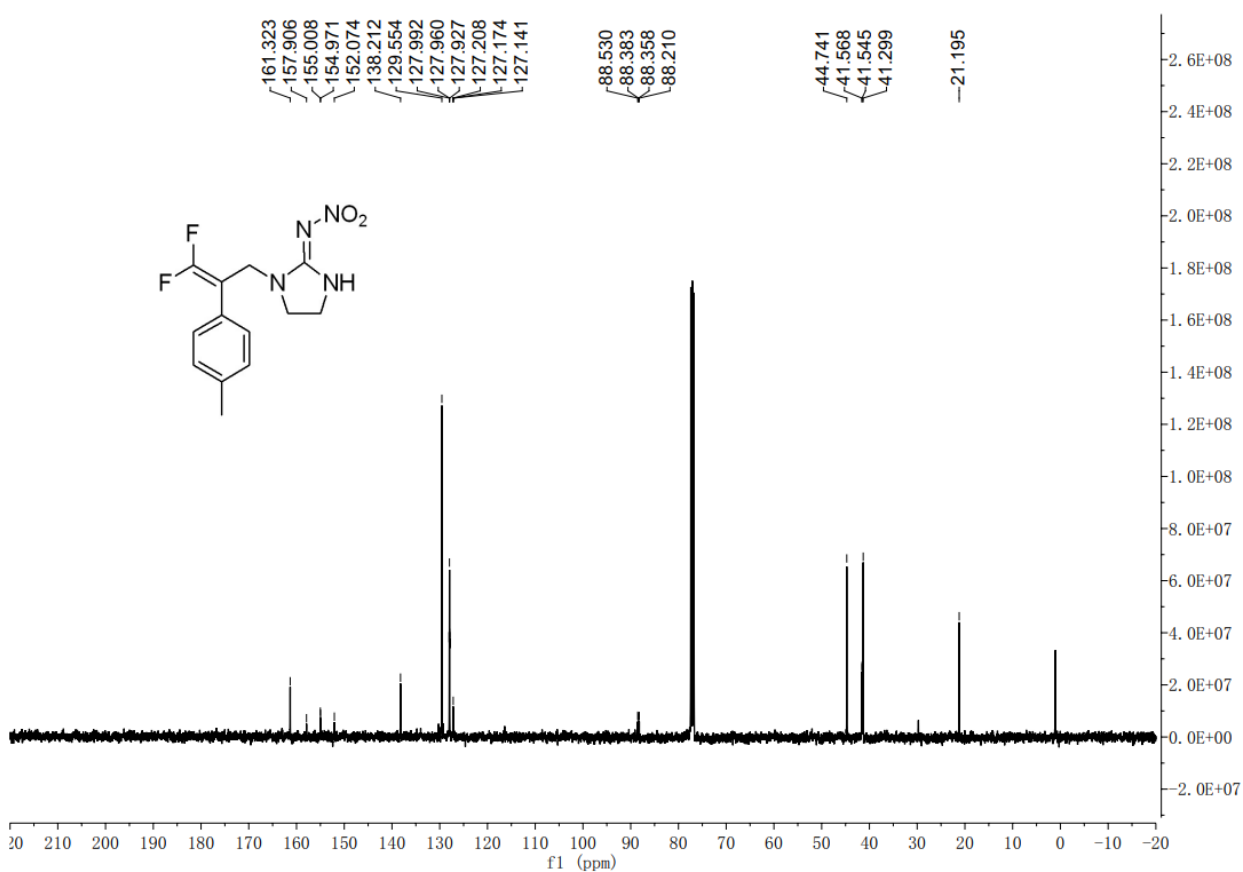

**<sup>19</sup>F NMR spectrum of 4fa (564 MHz, CDCl<sub>3</sub>)**

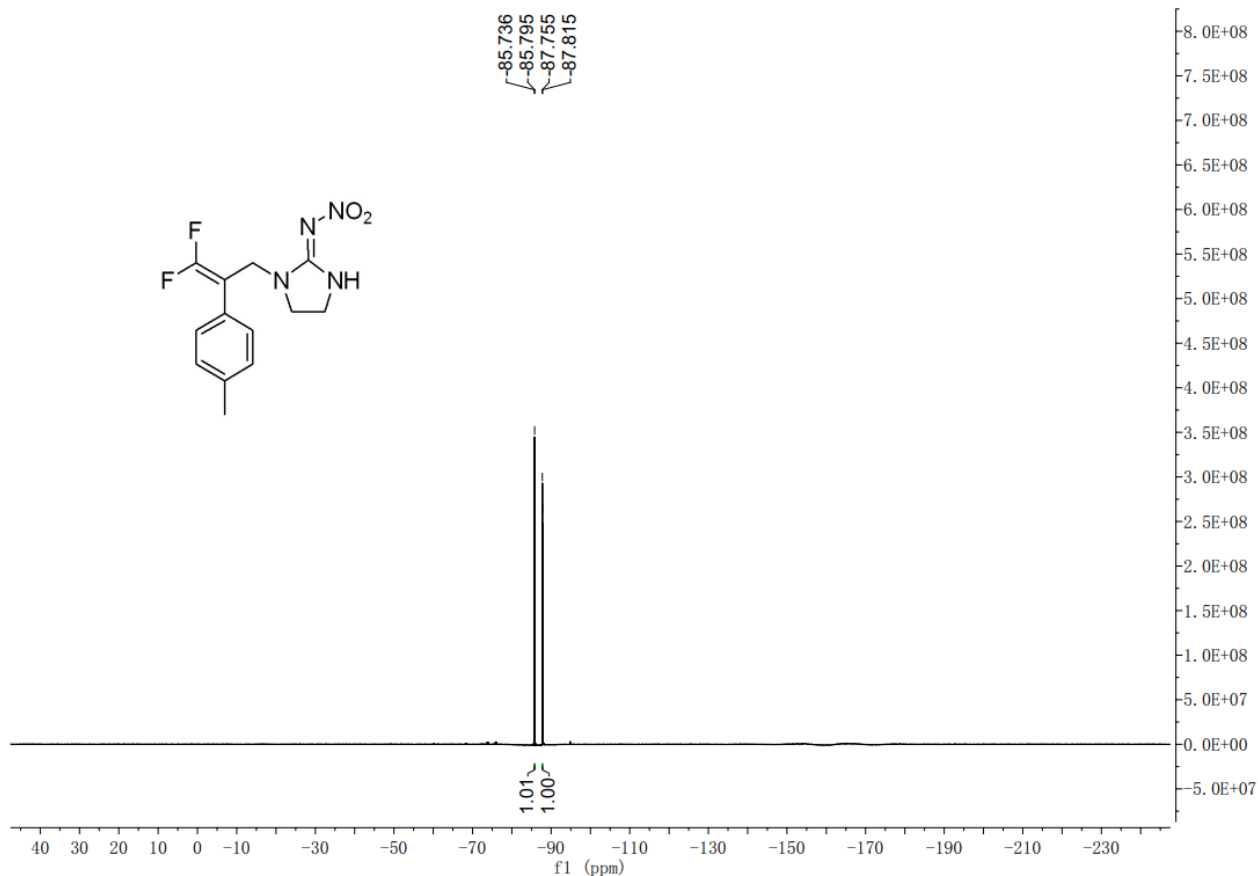

**HRMS (ESI) spectrum of 4fa**

Monoisotopic Mass, Even Electron Ions

86 formula(e) evaluated with 1 results within limits (all results (up to 1000) for each mass)

Elements Used:

C: 13-13 H: 14-16 N: 0-8 O: 0-6 F: 2-3 Na: 1-1

15

221219-2-4 26 (0.161)

1: TOF MS ES+  
1.79e+006

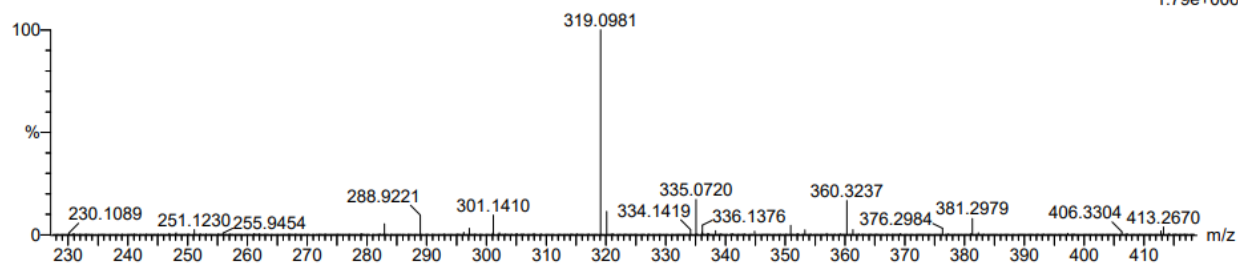

Minimum: -1.5  
Maximum: 5.0 50.0 50.0

| Mass     | Calc. Mass | mDa  | PPM  | DBE | i-FIT | Norm | Conf (%) | Formula             |
|----------|------------|------|------|-----|-------|------|----------|---------------------|
| 319.0981 | 319.0983   | -0.2 | -0.6 | 7.5 | 664.0 | n/a  | n/a      | C13 H14 N4 O2 F2 Na |

**<sup>1</sup>H NMR spectrum of 4ua (400 MHz, acetone-*d*<sub>6</sub>)**

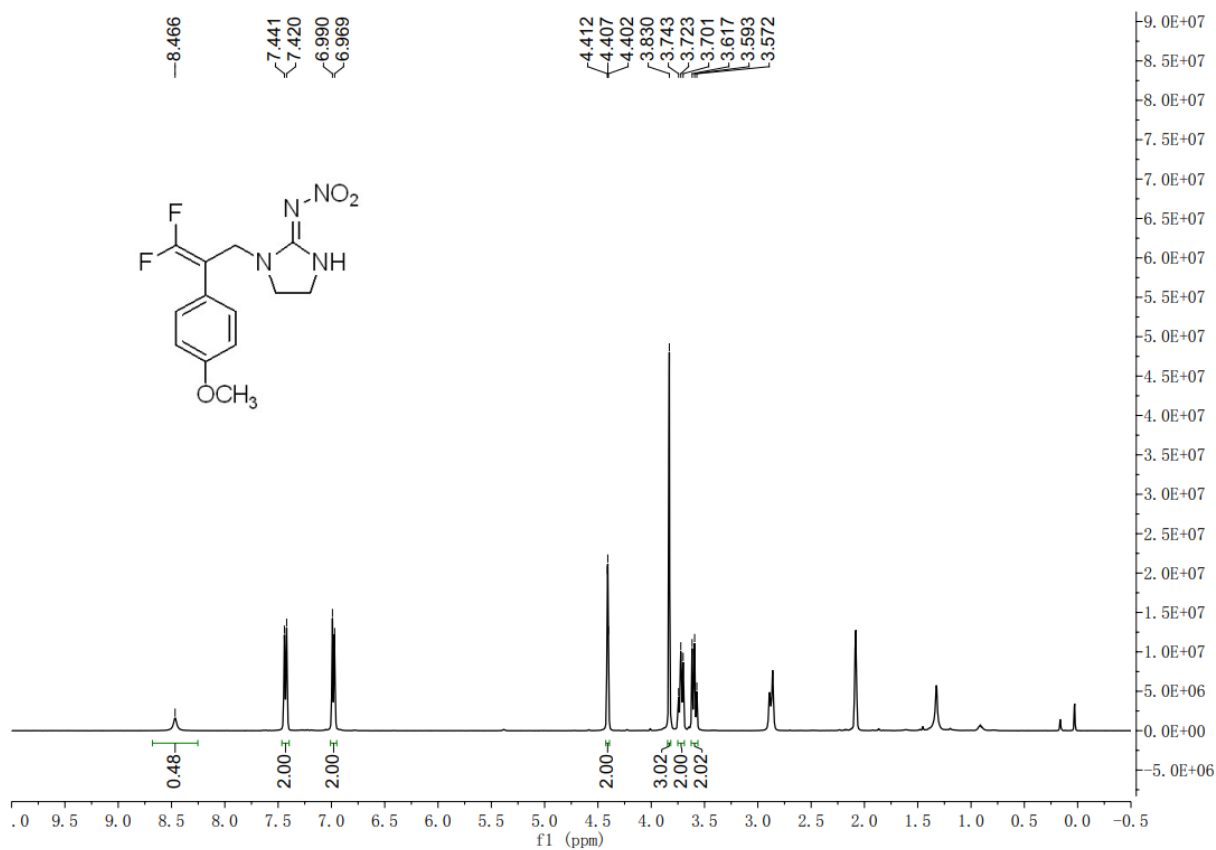

**<sup>13</sup>C NMR spectrum of 4ua (100 MHz, acetone-*d*<sub>6</sub>)**

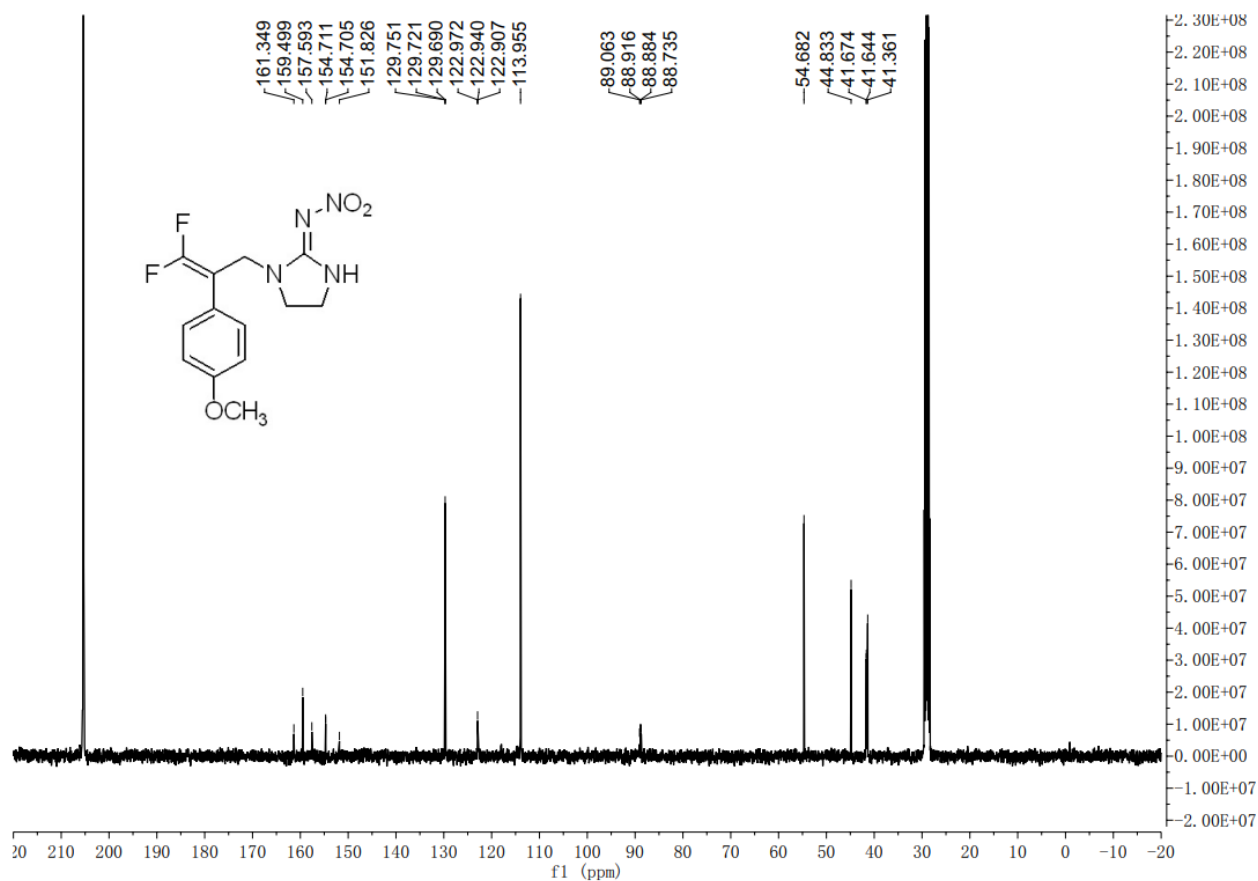

**<sup>19</sup>F NMR spectrum of 4ua (564 MHz, acetone-*d*<sub>6</sub>)**

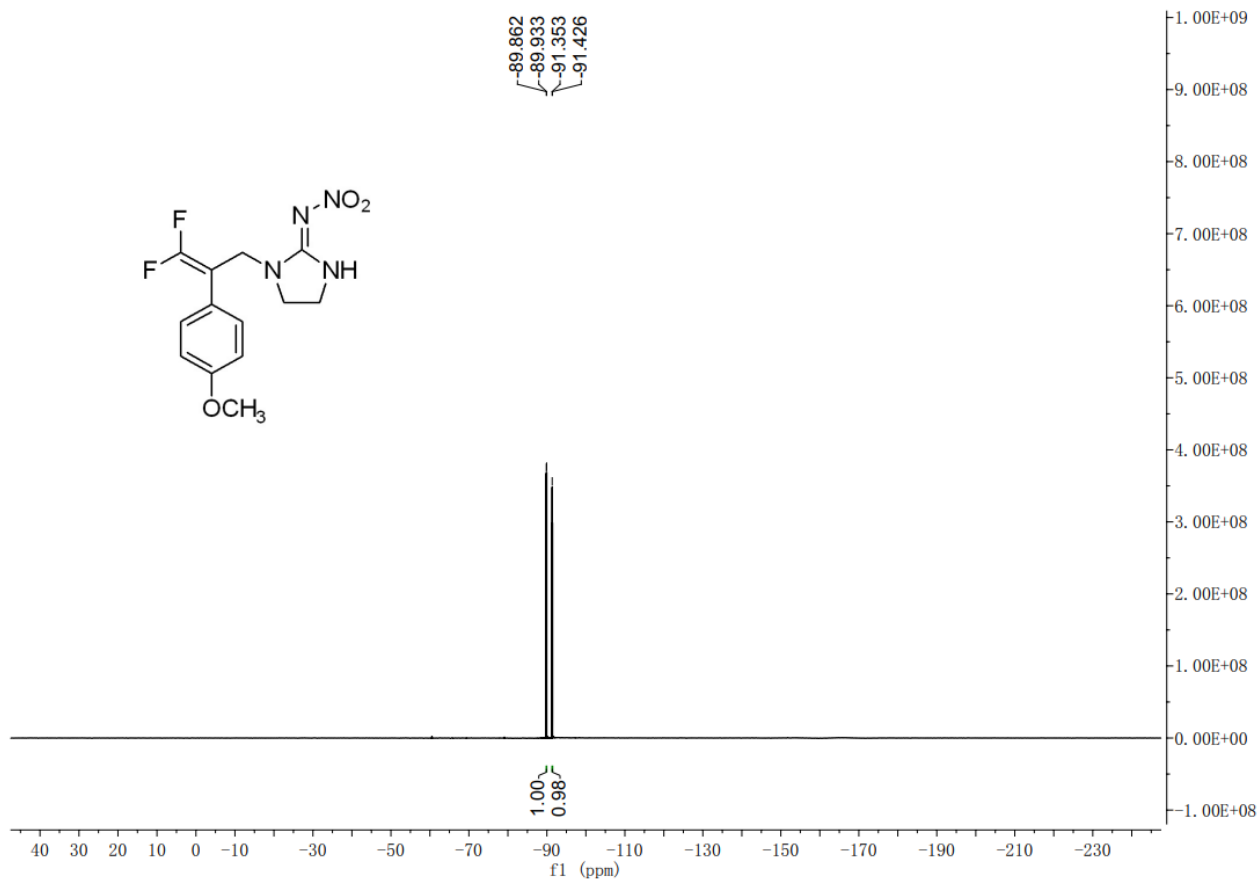

**HRMS (ESI) spectrum of 4ua**

Monoisotopic Mass, Even Electron Ions

60 formula(e) evaluated with 1 results within limits (all results (up to 1000) for each mass)

Elements Used:

C: 13-13 H: 0-45 N: 0-8 O: 0-6 F: 2-2 Na: 1-1

10

221219-2-1 17 (0.114)

1: TOF MS ES+  
5.92e+006

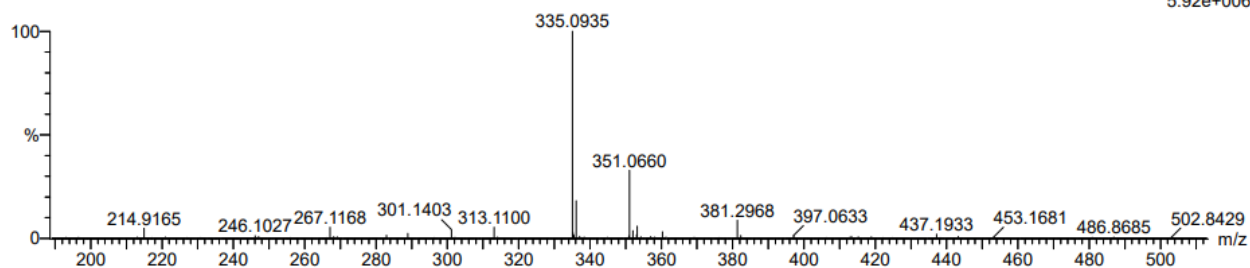

Min imum: -1.5  
Max imum: 50.0

| Mass     | Calc. Mass | mDa | PPM | DBE | i-FIT | Norm | Conf (%) | Formula             |
|----------|------------|-----|-----|-----|-------|------|----------|---------------------|
| 335.0935 | 335.0932   | 0.3 | 0.9 | 7.5 | 701.1 | n/a  | n/a      | C13 H14 N4 O3 F2 Na |

**<sup>1</sup>H NMR spectrum of 4va (400 MHz, CDCl<sub>3</sub>)**

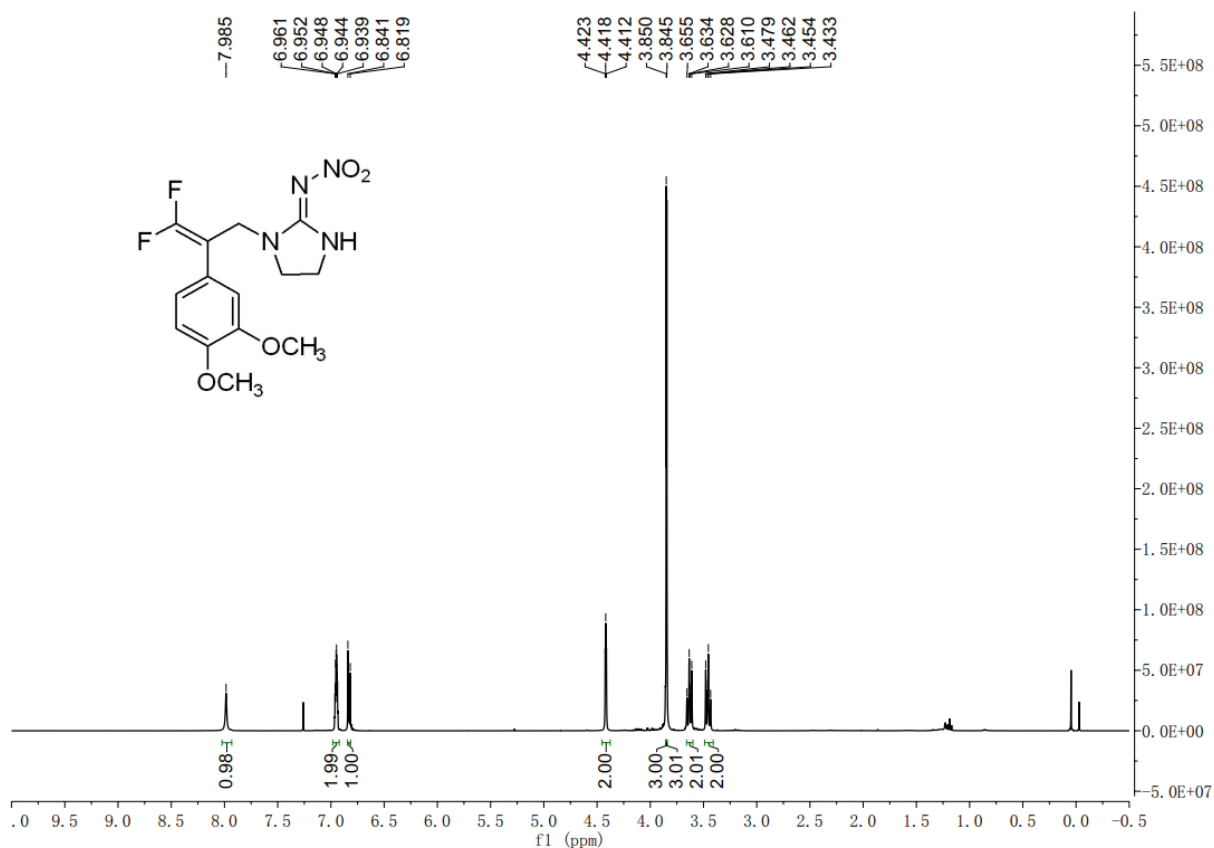

**<sup>13</sup>C NMR spectrum of 4va (100 MHz, CDCl<sub>3</sub>)**

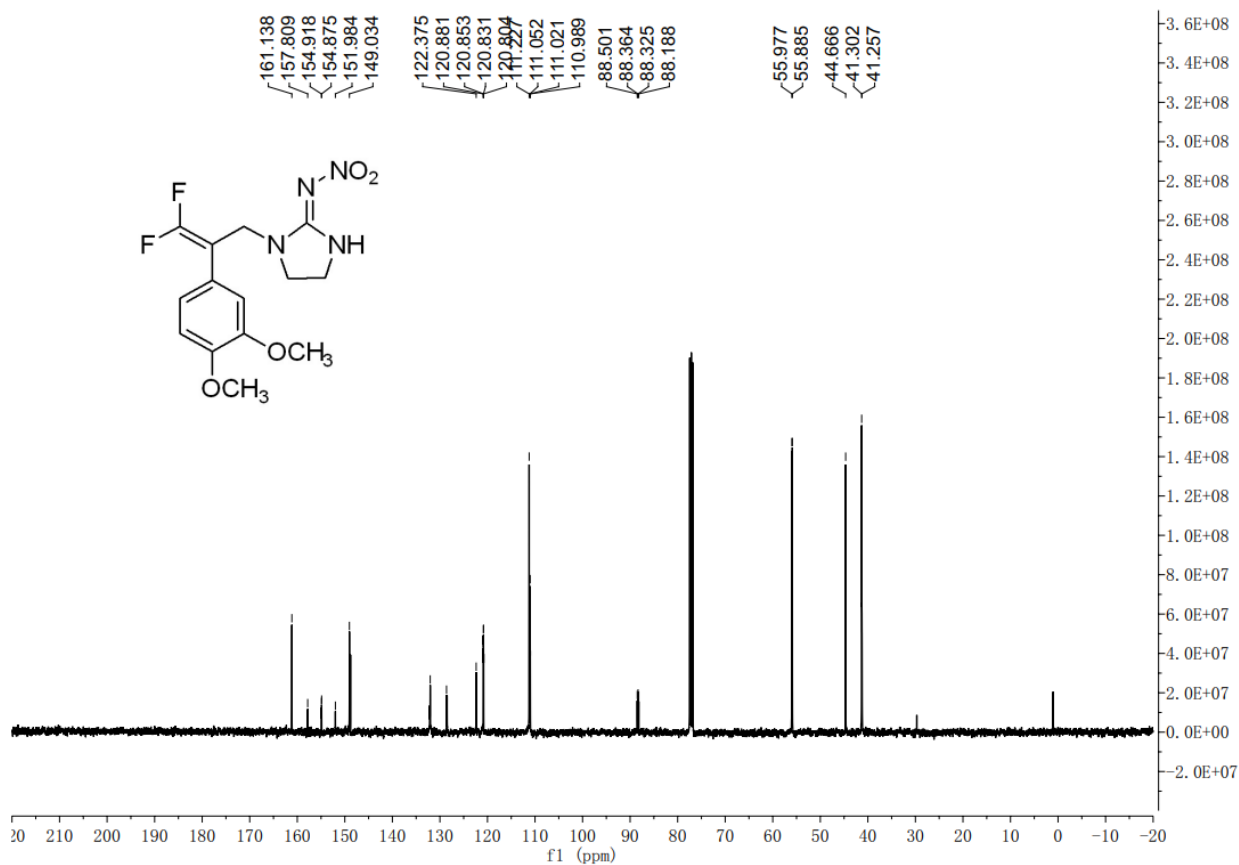

**<sup>19</sup>F NMR spectrum of 4va (564 MHz, CDCl<sub>3</sub>)**

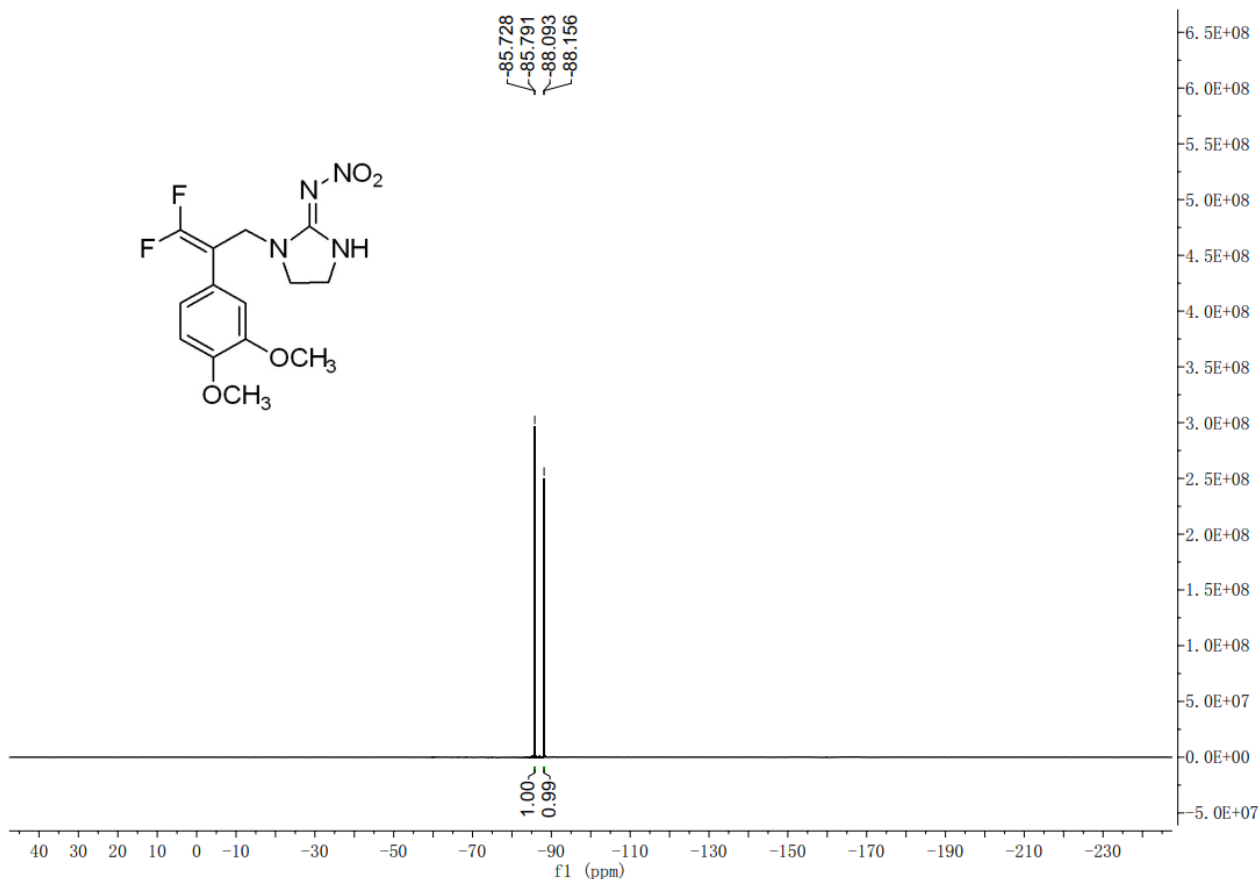

**HRMS (ESI) spectrum of 4va**

Monoisotopic Mass, Even Electron Ions

78 formula(e) evaluated with 1 results within limits (all results (up to 1000) for each mass)

Elements Used:

C: 14-14 H: 14-16 N: 0-8 O: 0-6 F: 2-3 Na: 1-1

15

221219-2-3 21 (0.135)

1: TOF MS ES+  
4.70e+006

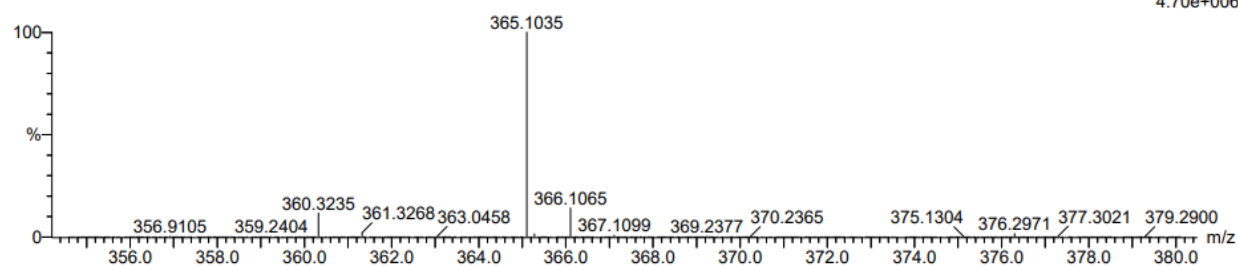

Minimum: -1.5  
Maximum: 50.0

| Mass     | Calc. Mass | mDa  | PPM  | DBE | i-FIT | Norm | Conf(%) | Formula             |
|----------|------------|------|------|-----|-------|------|---------|---------------------|
| 365.1035 | 365.1037   | -0.2 | -0.5 | 7.5 | 710.5 | n/a  | n/a     | C14 H16 N4 O4 F2 Na |

**<sup>1</sup>H NMR spectrum of 4wa (400 MHz, CDCl<sub>3</sub>)**

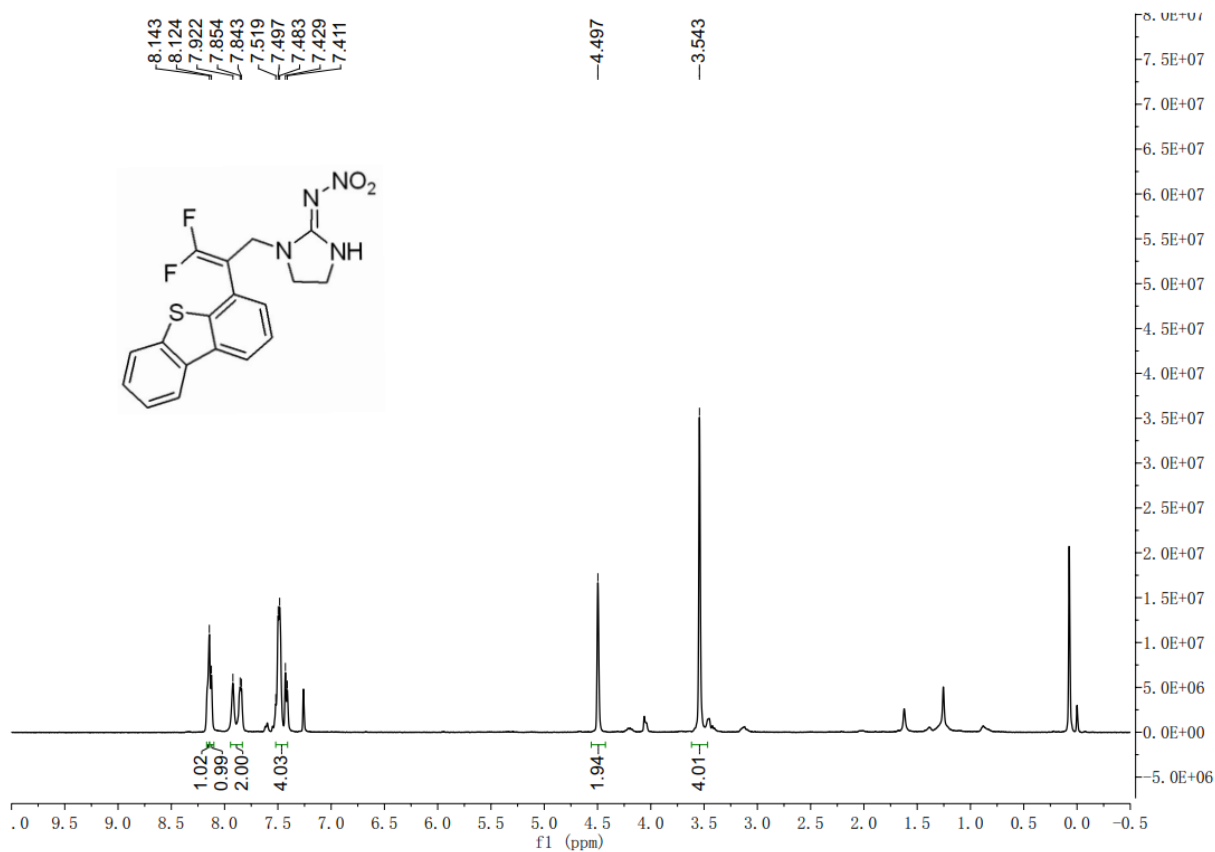

**<sup>13</sup>C NMR spectrum of 4wa (100 MHz, CDCl<sub>3</sub>)**

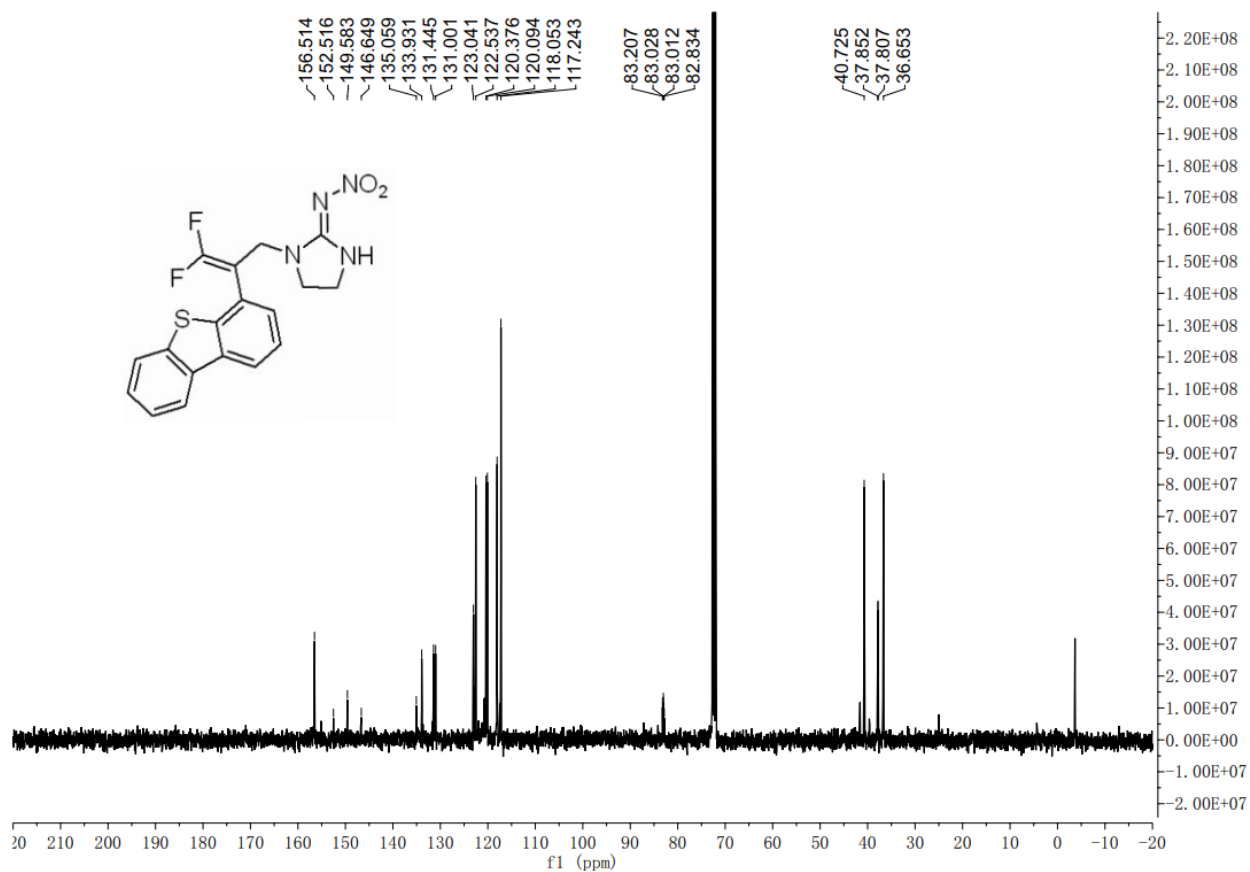



**<sup>19</sup>F NMR spectrum of 4wa (564 MHz, CDCl<sub>3</sub>)**

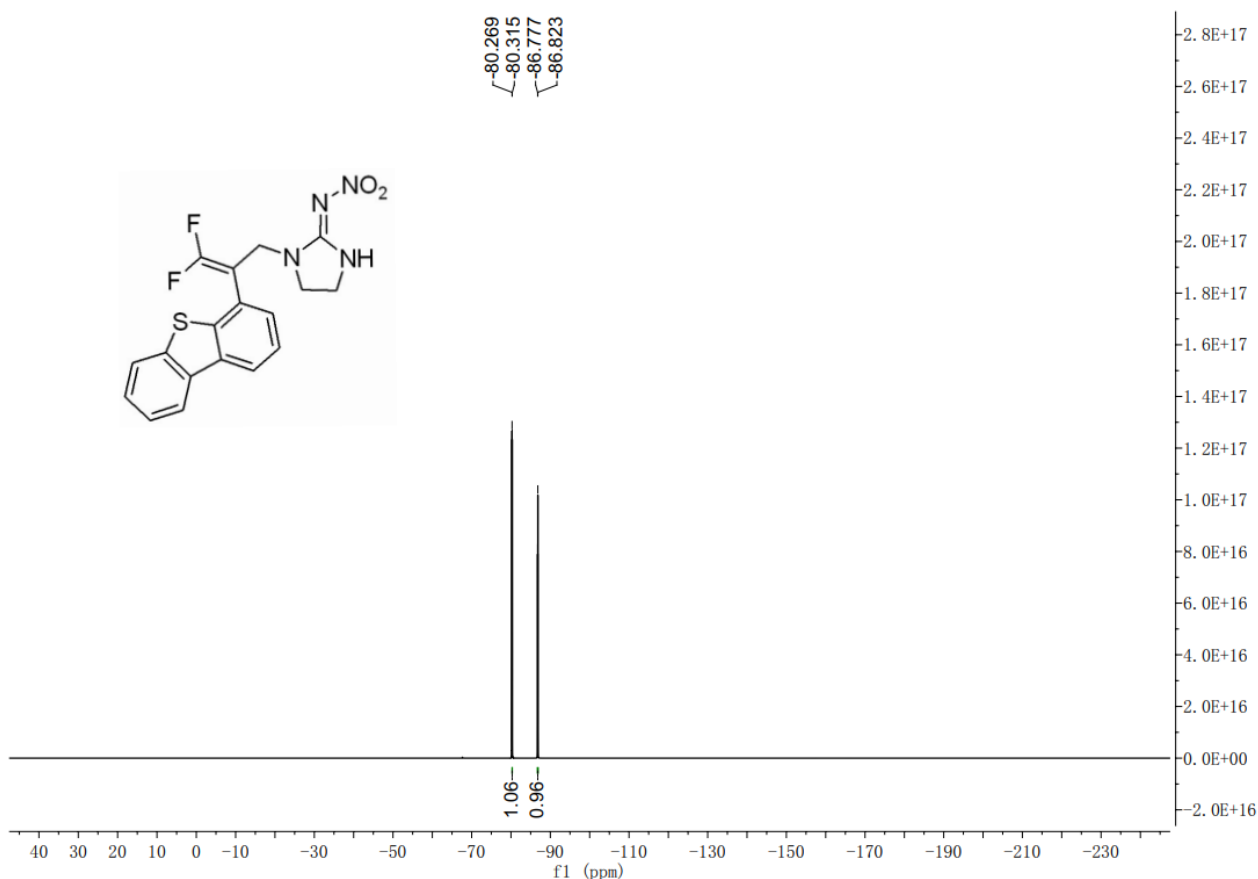

**HRMS (ESI) spectrum of 4wa**

Monoisotopic Mass, Even Electron Ions

81 formula(e) evaluated with 1 results within limits (all results (up to 1000) for each mass)

Elements Used:

C: 18-18 H: 14-16 N: 0-8 O: 0-6 F: 2-3 Na: 1-1 S: 1-1

15

221219-2-2 20 (0.130)

1: TOF MS ES+  
6.19e+006

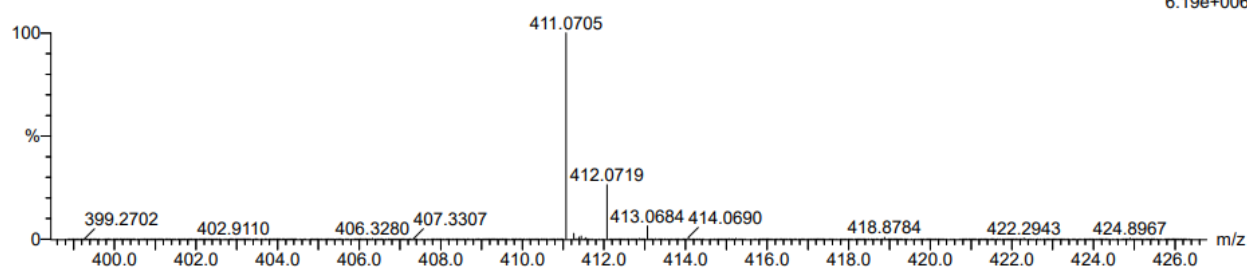

Minimum: -1.5  
Maximum: 50.0

| Mass     | Calc. Mass | mDa | PPM | DBE  | i-FIT | Norm | Conf(%) | Formula                                                                          |
|----------|------------|-----|-----|------|-------|------|---------|----------------------------------------------------------------------------------|
| 411.0705 | 411.0703   | 0.2 | 0.5 | 12.5 | 571.9 | n/a  | n/a     | C <sub>18</sub> H <sub>14</sub> N <sub>4</sub> O <sub>2</sub> F <sub>2</sub> NaS |

**<sup>1</sup>H NMR spectrum of 4gc (400 MHz, CDCl<sub>3</sub>)**

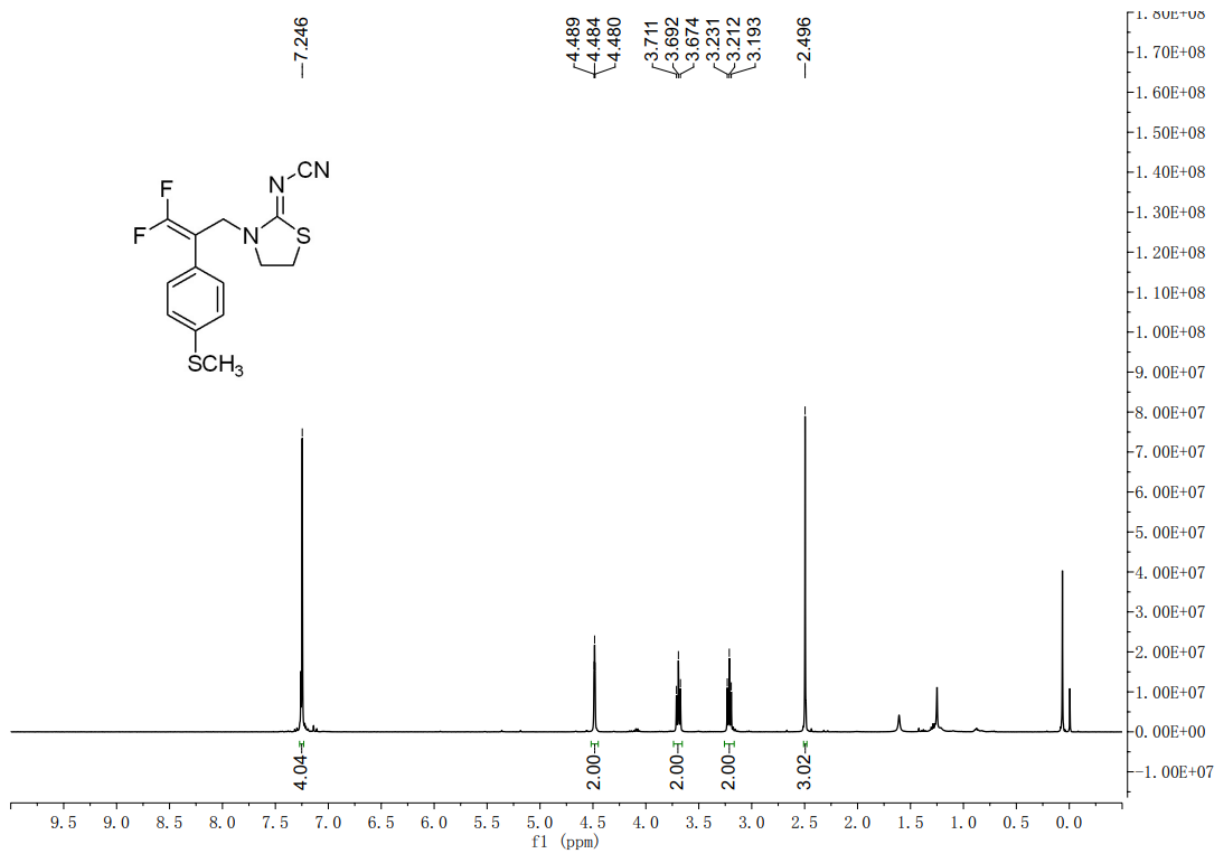

**<sup>13</sup>C NMR spectrum of 4gc (100 MHz, CDCl<sub>3</sub>)**

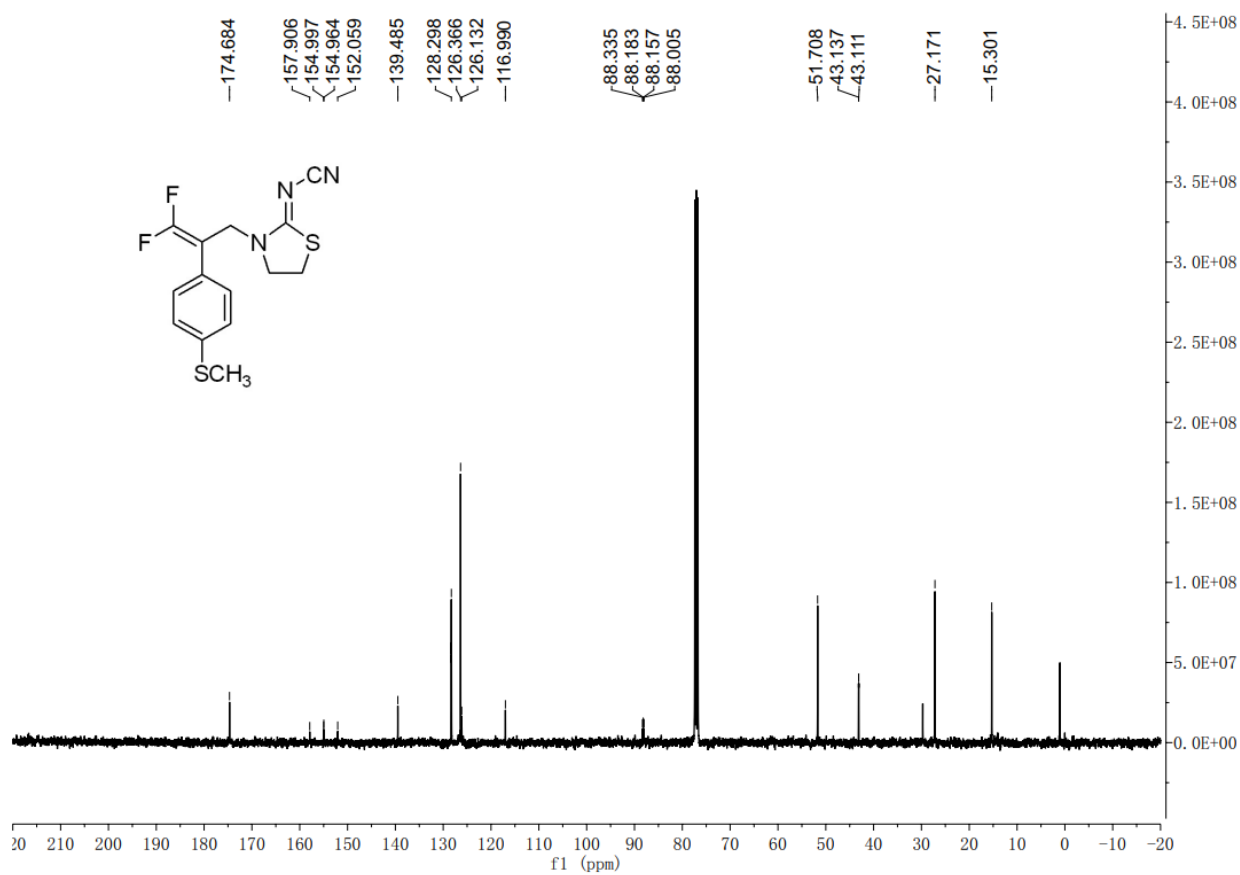

**<sup>19</sup>F NMR spectrum of 4gc (564 MHz, CDCl<sub>3</sub>)**

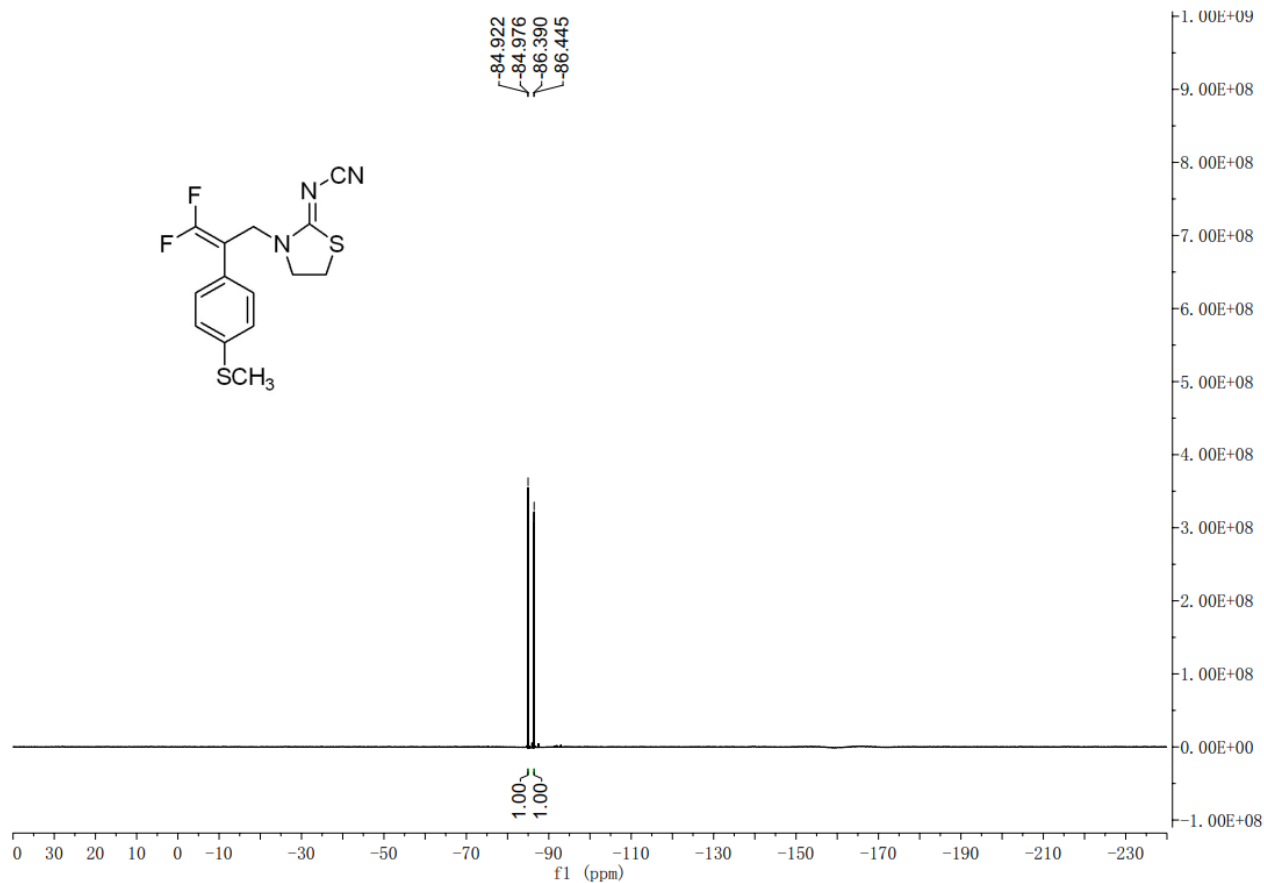

**HRMS (EI) spectrum of 4gc**

202230015 352 (5.867) Cm (352-(15+90))

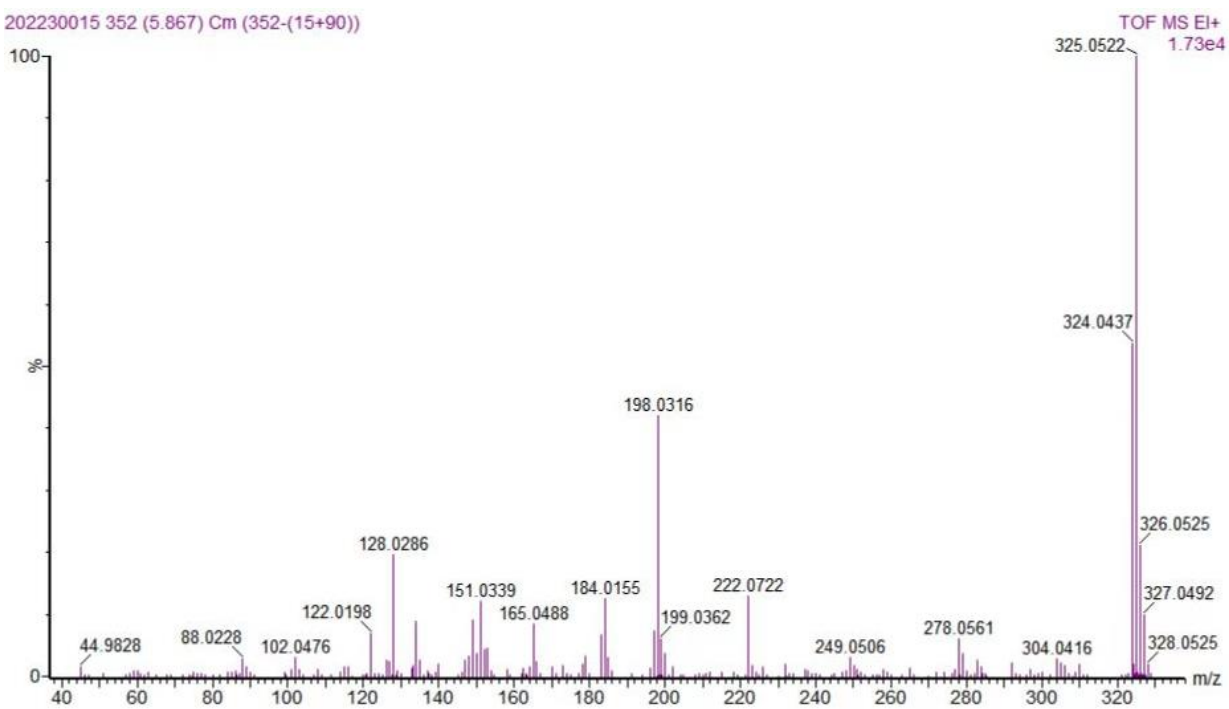

**<sup>1</sup>H NMR spectrum of 4hc (400 MHz, CDCl<sub>3</sub>)**

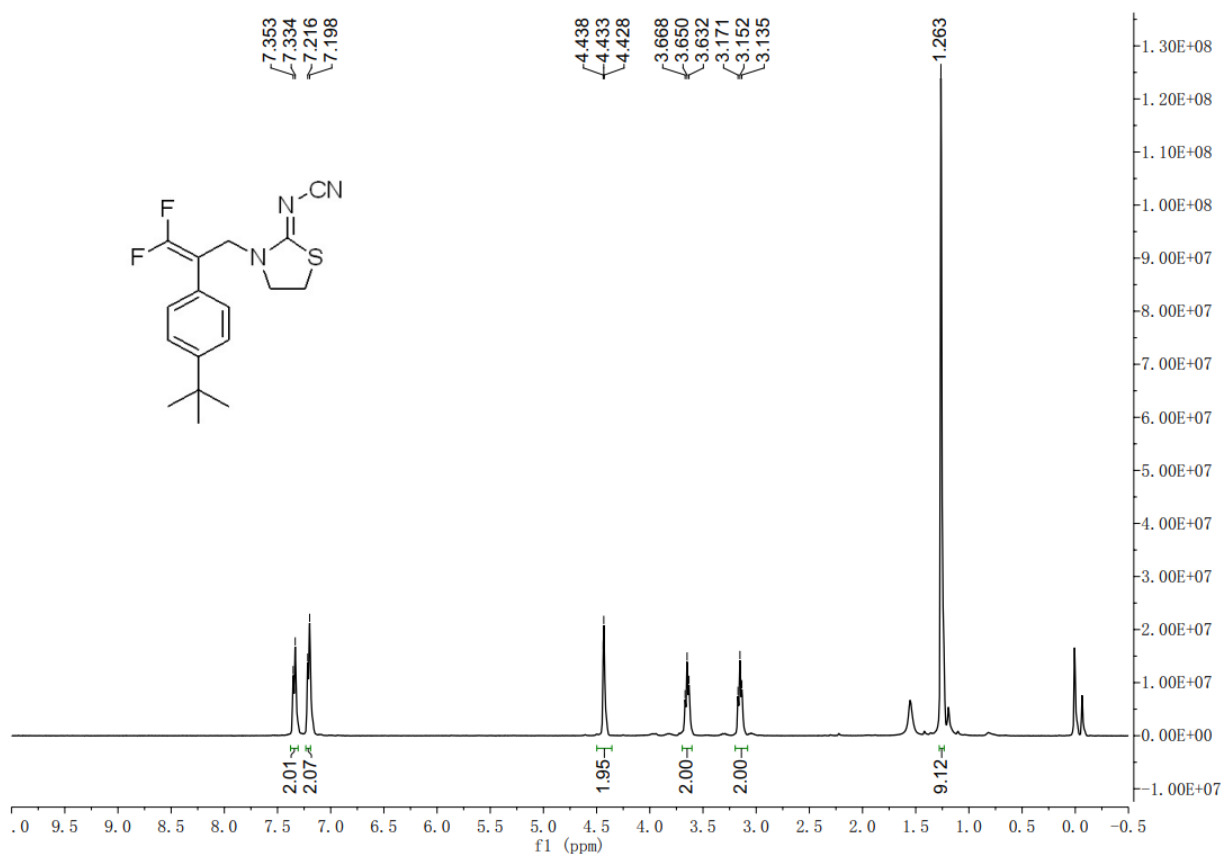

**<sup>13</sup>C NMR spectrum of 4hc (100 MHz, CDCl<sub>3</sub>)**

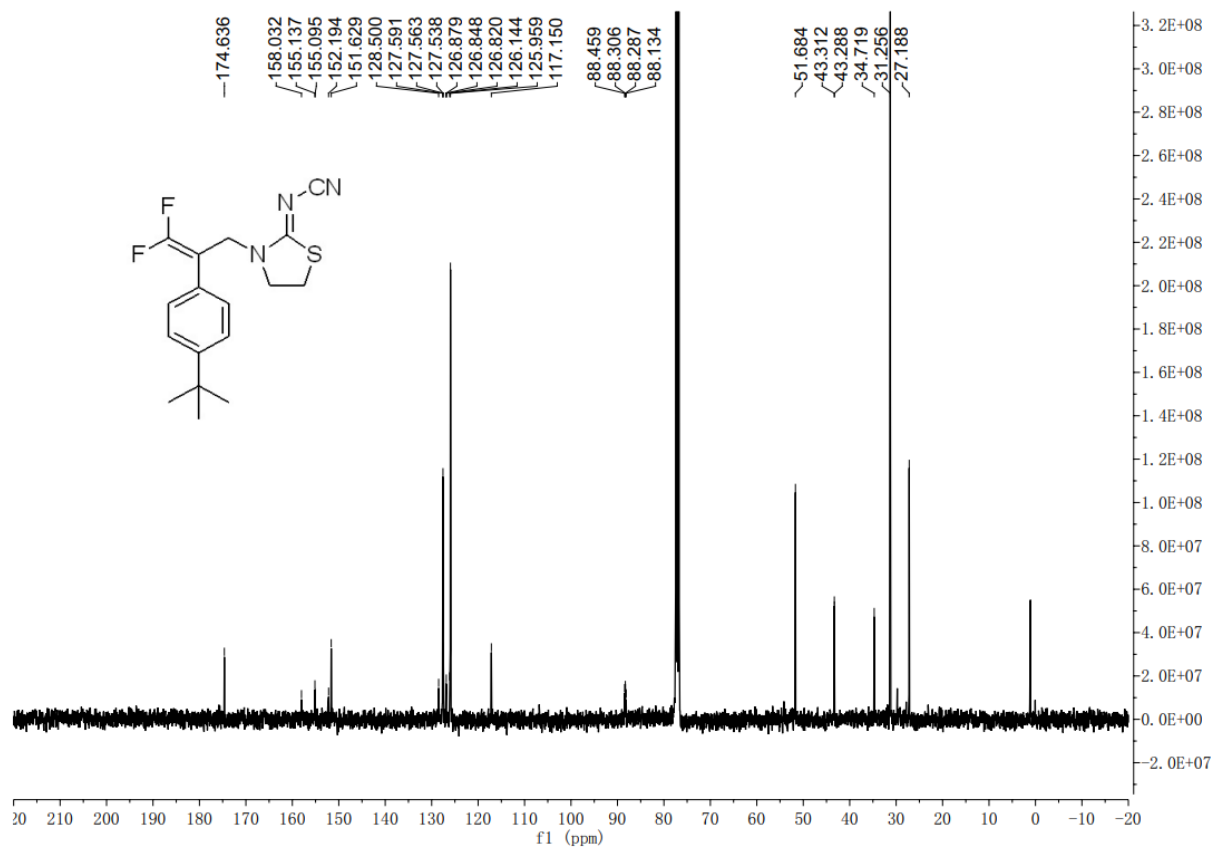

**$^{19}\text{F}$  NMR spectrum of 4hc (564 MHz,  $\text{CDCl}_3$ )**

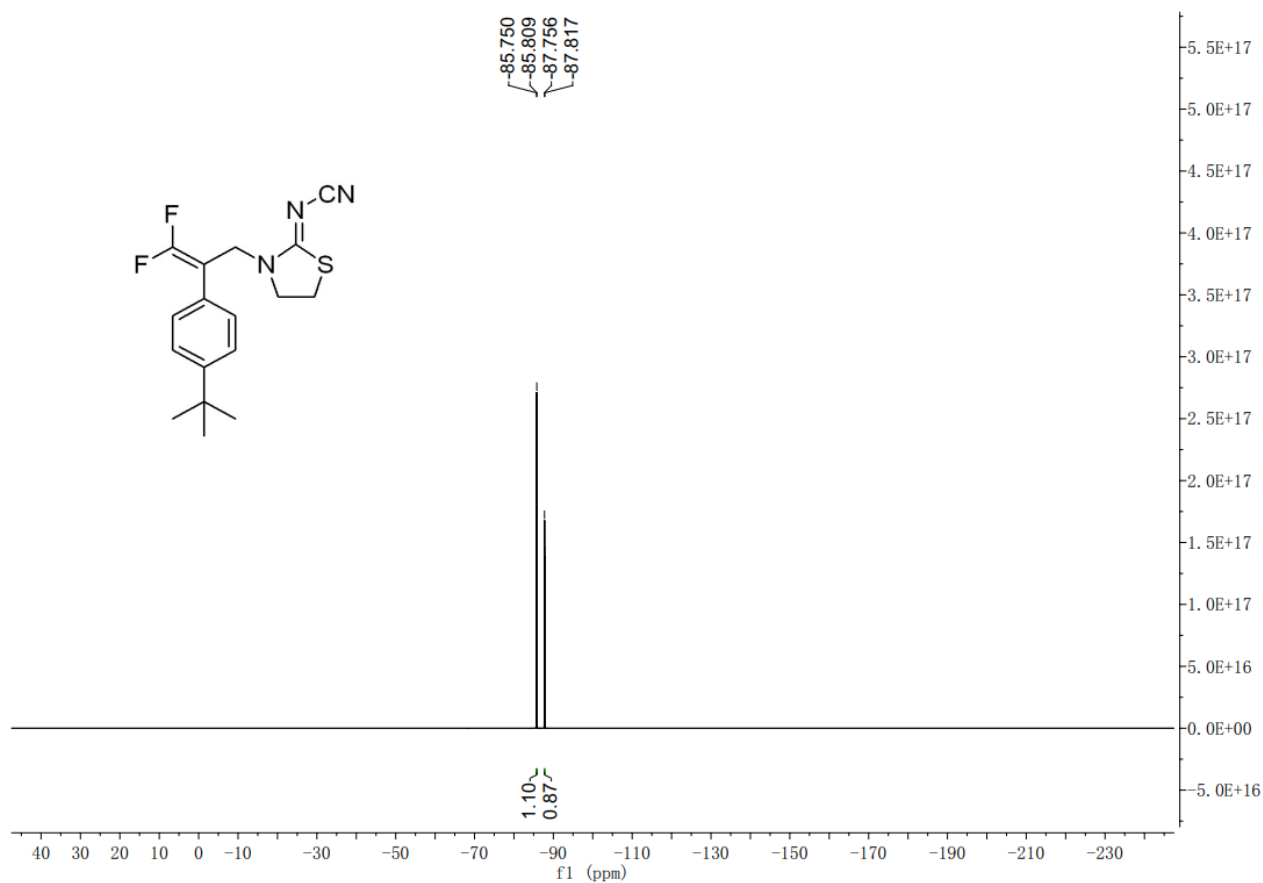

**HRMS (EI) spectrum of 4hc**

20222064 456 (7.600) Cm (456-(12+34))

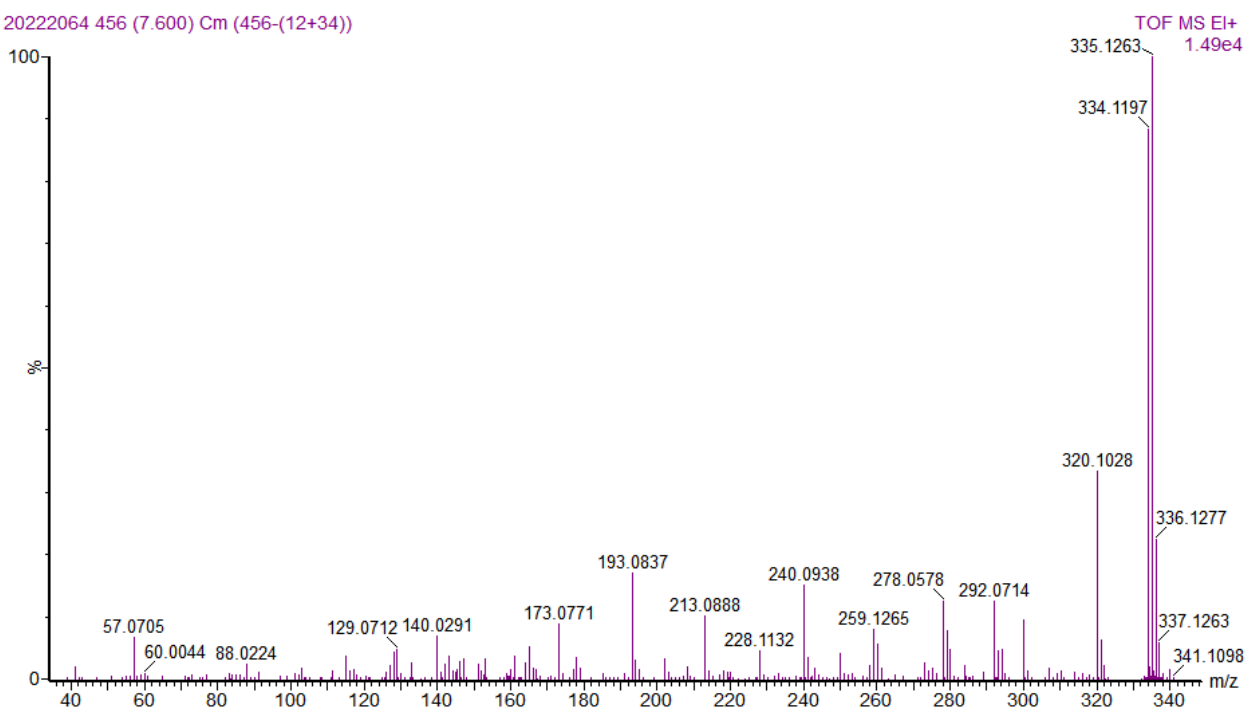

**<sup>1</sup>H NMR spectrum of 4xc (400 MHz, CDCl<sub>3</sub>)**

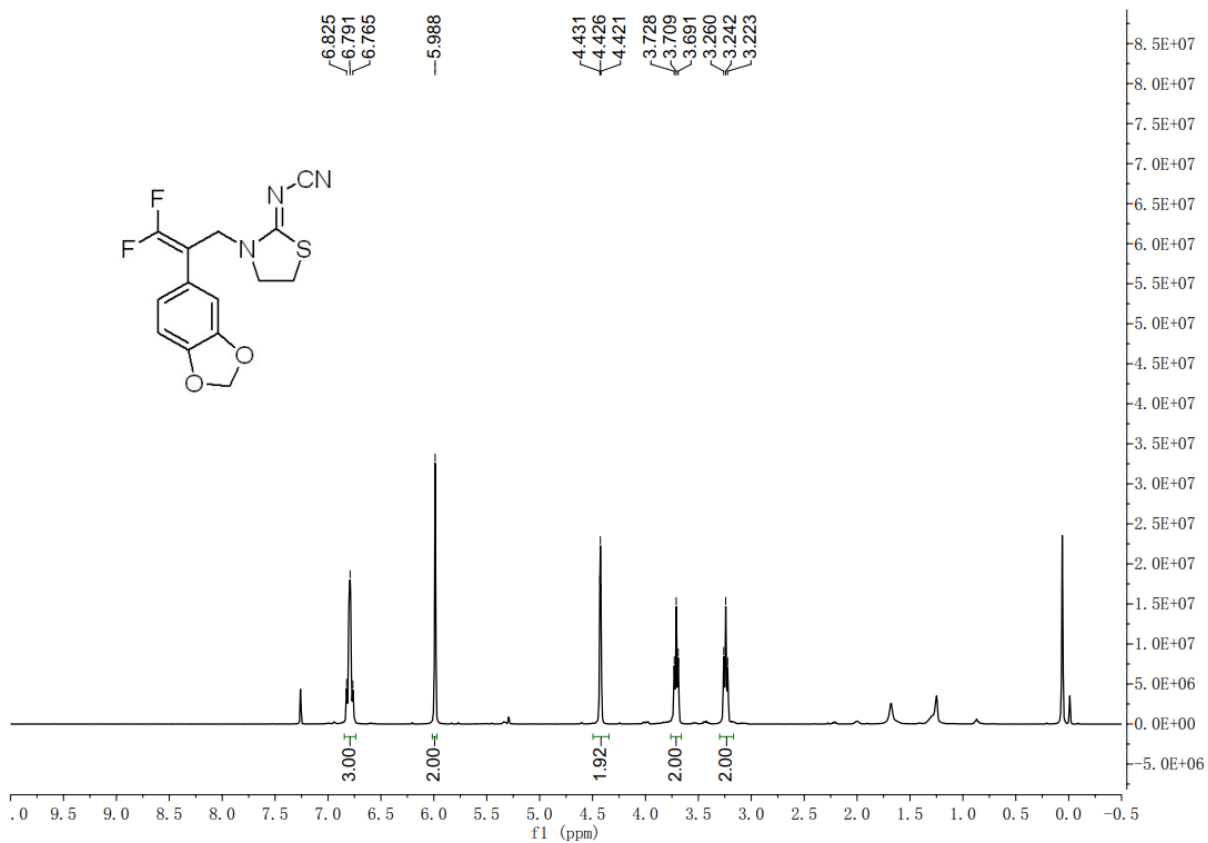

**<sup>13</sup>C NMR spectrum of 4xc (100 MHz, CDCl<sub>3</sub>)**

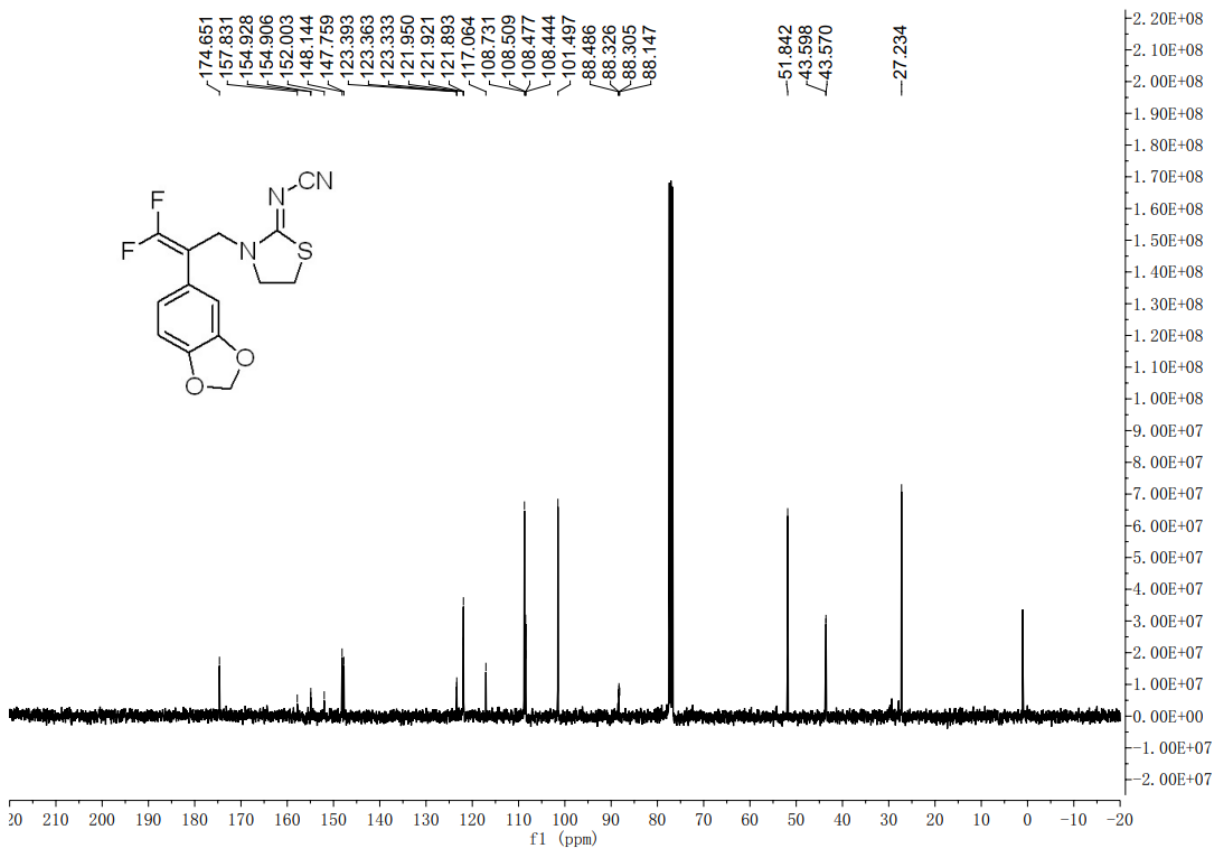

**<sup>19</sup>F NMR spectrum of 4xc (564 MHz, CDCl<sub>3</sub>)**

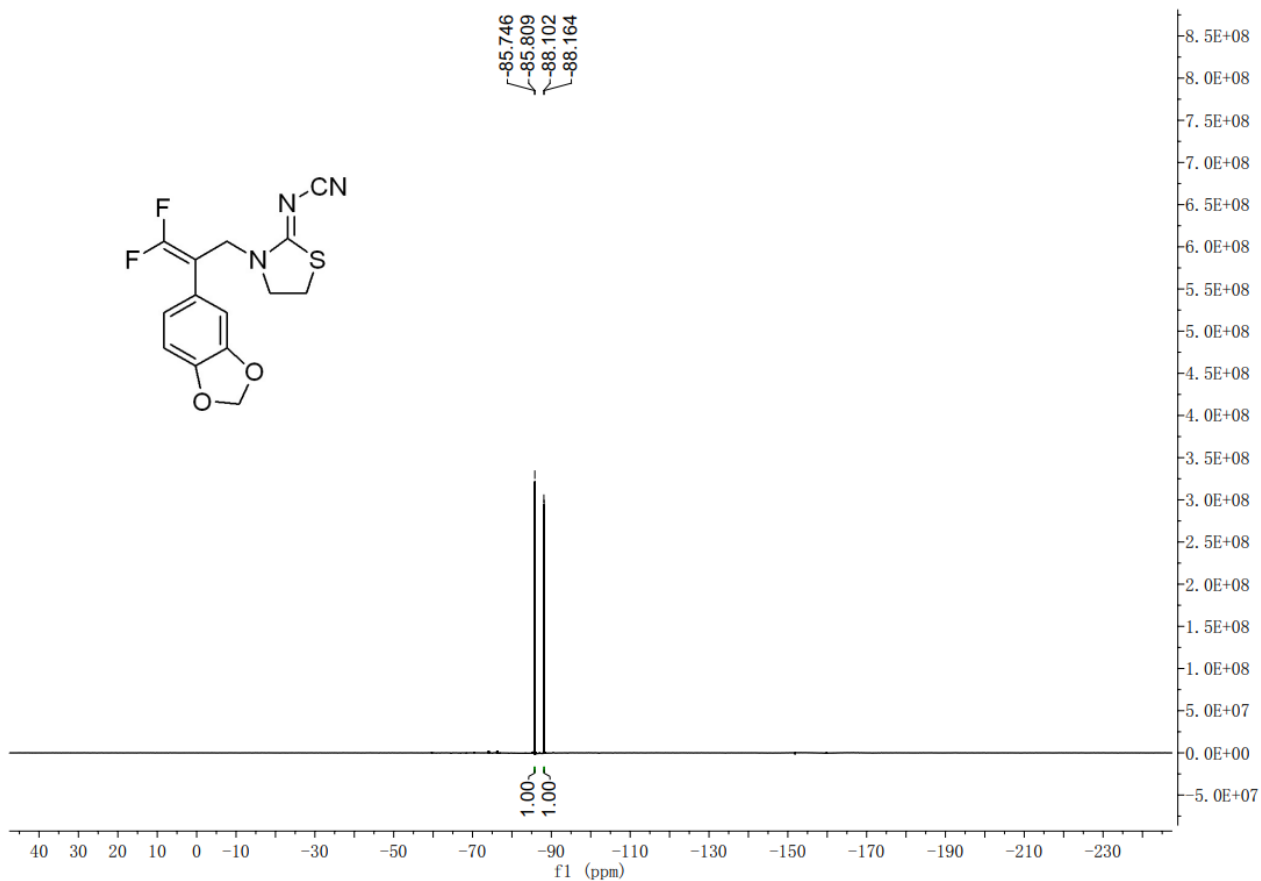

**HRMS (EI) spectrum of 4xc**

20222063 378 (6.303) Cm (378-(21+56))

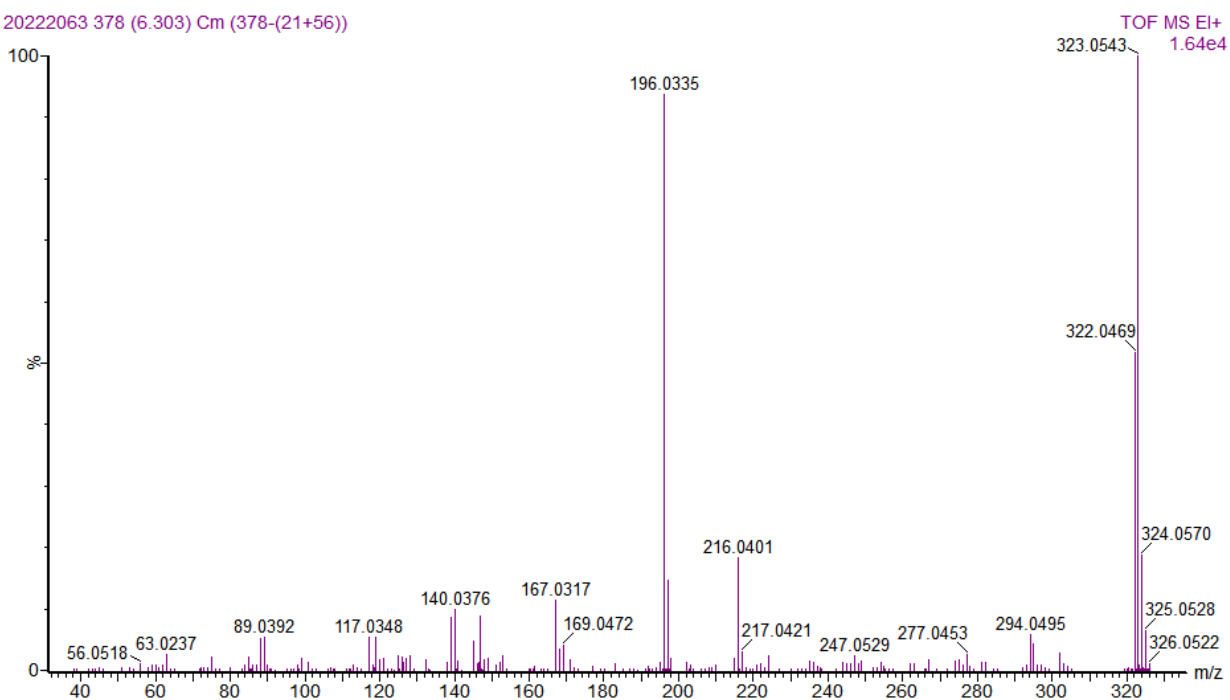

**<sup>1</sup>H NMR spectrum of 6 (400 MHz, acetone-*d*<sub>6</sub>)**

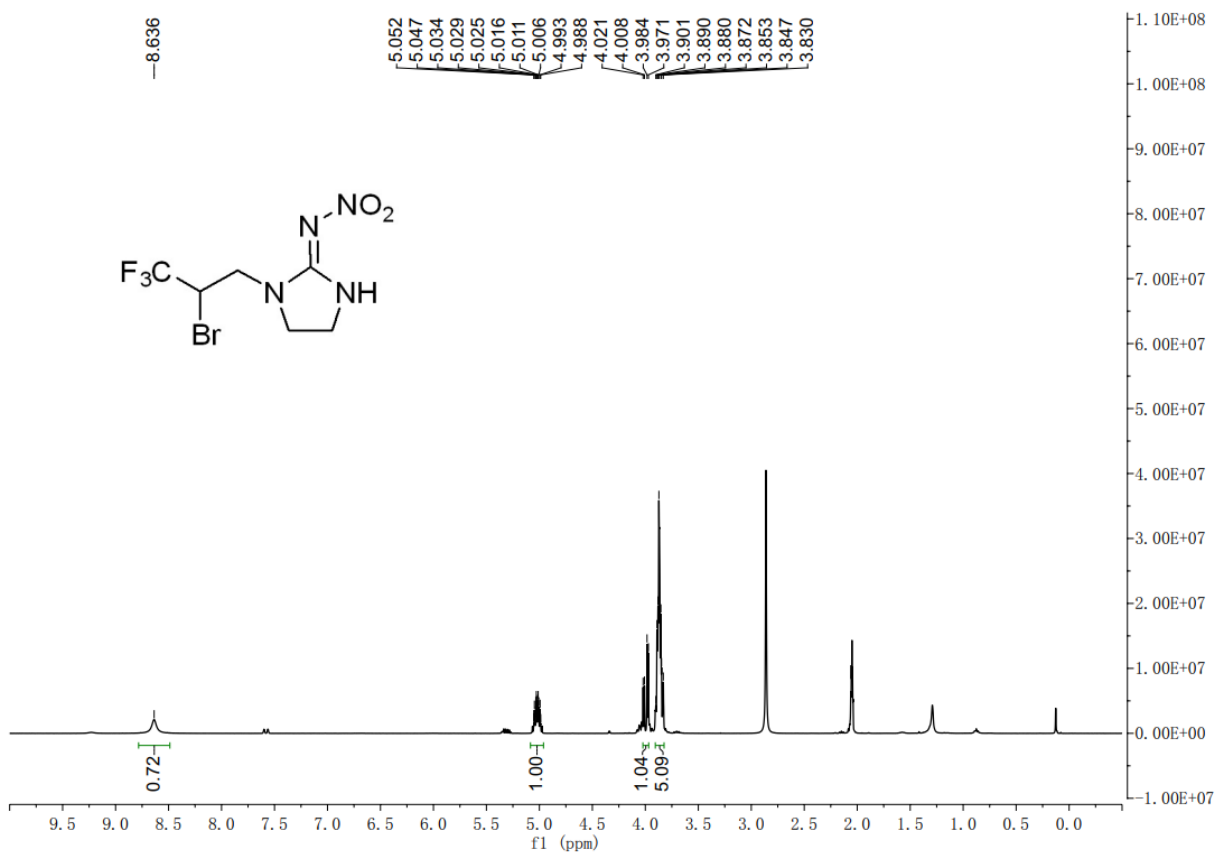

**<sup>13</sup>C NMR spectrum of 6 (100 MHz, acetone-*d*<sub>6</sub>)**

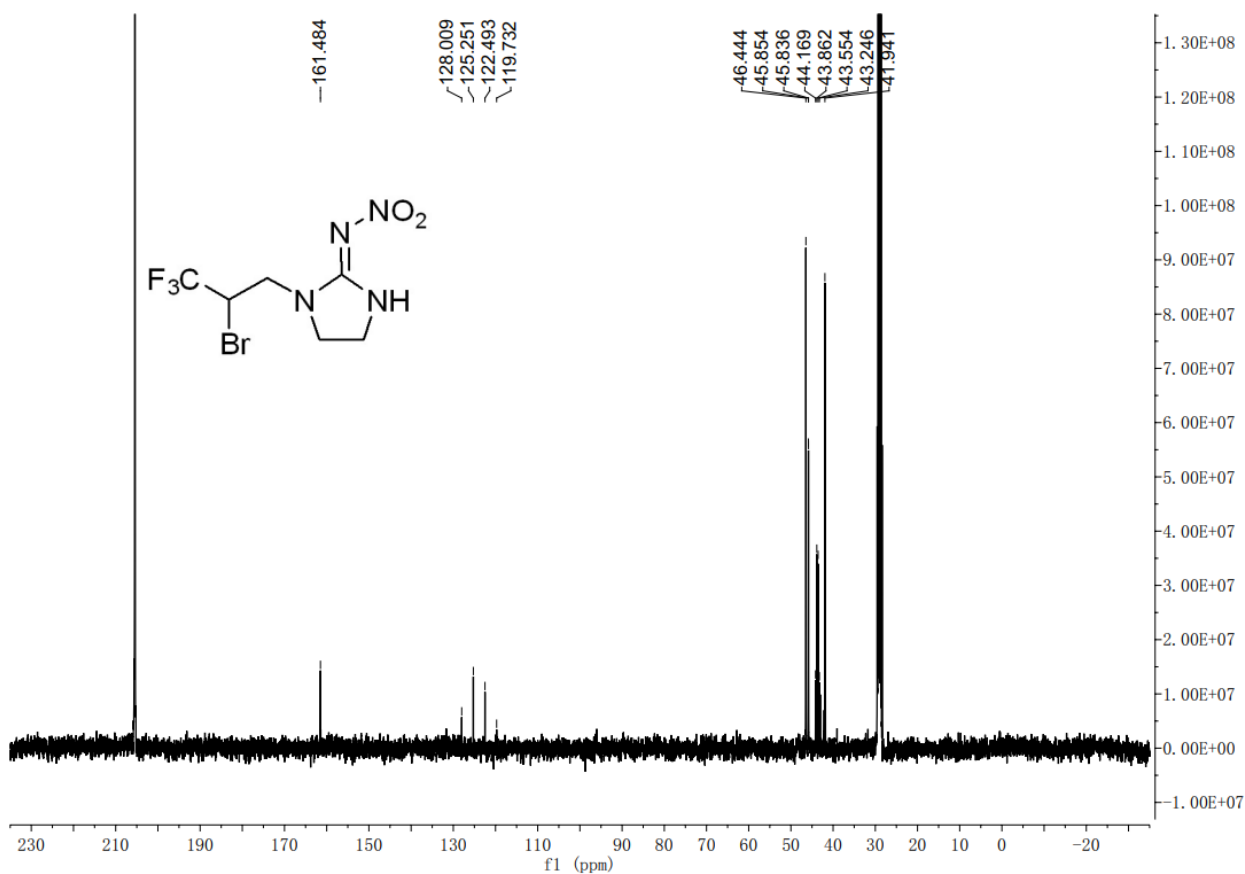



**$^{19}\text{F}$  NMR spectrum of 6 (564 MHz, acetone- $d_6$ )**

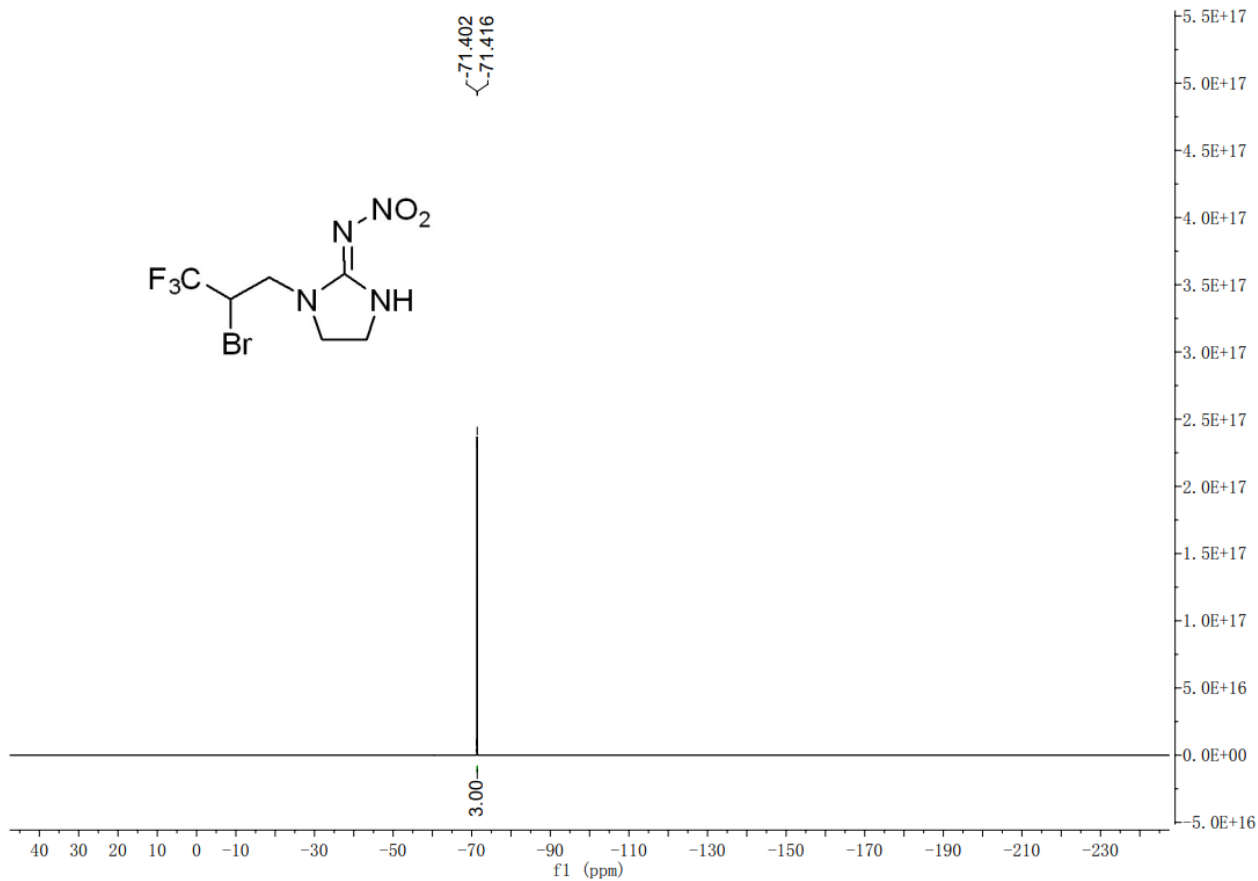

**HRMS (EI) spectrum of 6**

20221832 377 (6.283) Cm (377-(19+114))

TOF MS EI+  
1.84e4

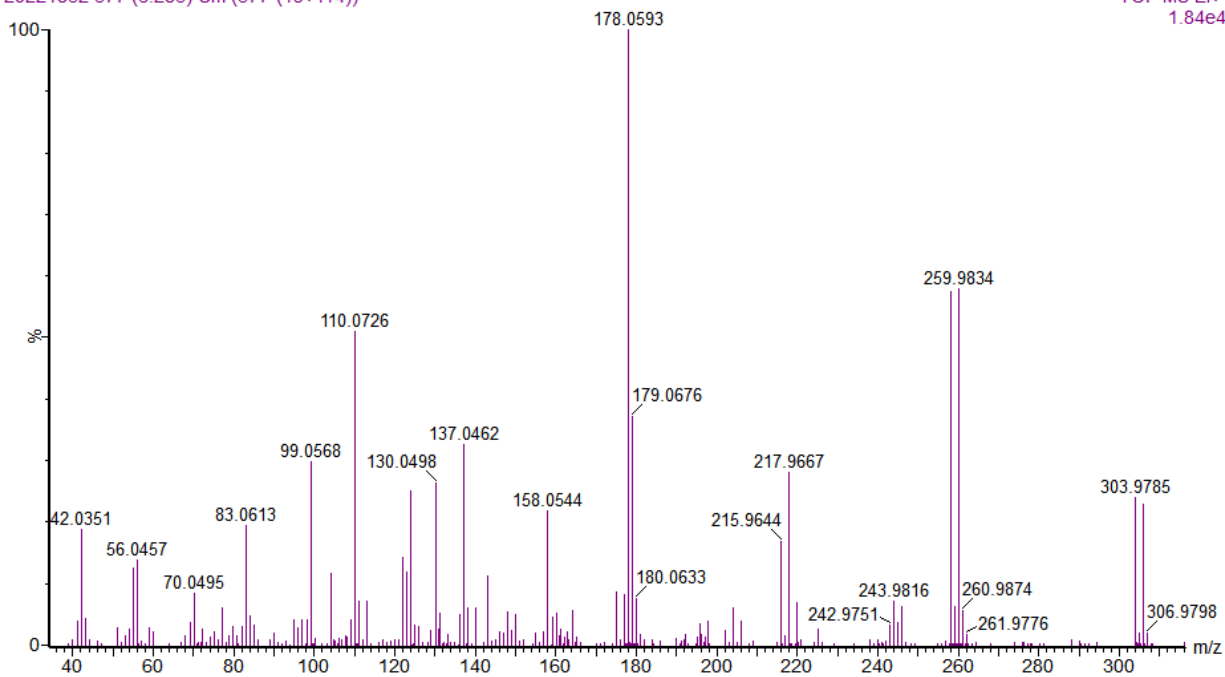

Supplement: s1 [file s1]
